# Supplementary material for: Gold-catalyzed dual annulation of azide-tethered alkynes with nitriles: expeditious synthesis of oxazolo[4,5-c]quinolines
Source: Royal Society of Chemistry journal article supplement (doi:10.1039/c9qo00568d), 2019-01-01
Supplement: c9qo00568d1.pdf [file c9qo00568d1.pdf]

## SUPPORTING INFORMATION

### **Gold-catalyzed dual annulation of azide-tethered alkynes with nitriles: expeditious synthesis of oxazolo[4,5-c]quinolines**

Han Su,<sup>a</sup> Ming Bao,<sup>b</sup> Chao Pei,<sup>a</sup> Wenhao Hu,<sup>\*b</sup> Lihua Qiu<sup>\*a</sup> and Xinfang Xu<sup>\*ab</sup>

<sup>a</sup> College of Chemistry, Chemical Engineering and Materials Science, Soochow University, Suzhou 215123, China

<sup>b</sup> Guangdong Key Laboratory of Chiral Molecule and Drug Discovery, School of Pharmaceutical Sciences, Sun Yat-sen University, Guangzhou 510006, China

Email: huwh9@mail.sysu.edu.cn

qiulihua@suda.edu.cn

xuxinfang@mail.sysu.edu.cn

## **Table of Contents**

|                                                                  |                |
|------------------------------------------------------------------|----------------|
| <b>1. General Information</b>                                    | <b>S2</b>      |
| <b>2. General Procedure for the Synthesis of Azide Alkynes 1</b> | <b>S2-S10</b>  |
| <b>3. Reactions of Nitriles with Azide Alkynes</b>               | <b>S10-S23</b> |
| <b>4. Reactions of Aldehydes with Azide Alkynes</b>              | <b>S23-S27</b> |
| <b>5. General Procedure for the Scale Up</b>                     | <b>S27</b>     |
| <b>6. Control Experiment</b>                                     | <b>S28-S29</b> |
| <b>7. Derivatizations</b>                                        | <b>S29-S31</b> |
| <b>8. References</b>                                             | <b>S31</b>     |
| <b>9. NMR Spectra for Compounds 3, 4a, 5a, 7, 8, 9 and 10</b>    | <b>S32-S74</b> |
| <b>10. Crystallographic Data for Compound 3s and 8</b>           | <b>S75-S76</b> |

## General Information

All reactions were carried out in oven-dried glassware under an atmosphere of dry argon. Metal catalysts used in this reaction were purchased from commercial sources and used without further purification. Flash column chromatography was performed using silica gel (300-400 mesh). Analytical thin-layer chromatography was performed using glass plates pre-coated with 200-300 mesh silica gel impregnated with a fluorescent indicator (254 nm).  $^1\text{H}$  NMR and  $^{13}\text{C}$  NMR spectra were recorded on a 400 MHz spectrometer in  $\text{CDCl}_3$ ; chemical shifts are reported in ppm with the solvent signals as reference, and coupling constants (J) are given in Hertz. The peak information is described as: br = broad, s = singlet, d = doublet, t = triplet, q = quartet, m = multiplet, comp = composite. High-resolution mass spectra (HRMS) were recorded on a commercial apparatus (CI Source).

## General Procedure for the Synthesis of Azide Alkynes 1.

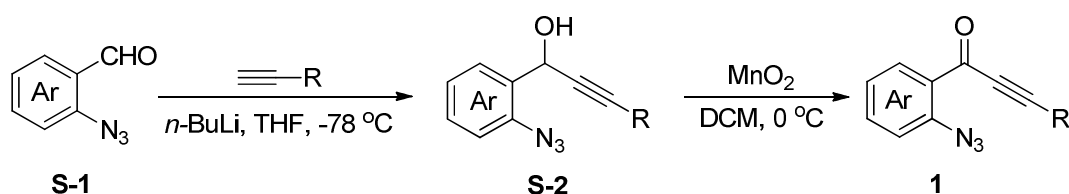

**Synthesis of S-2:** To a 50-mL oven-dried flask containing a magnetic stirring bar, alkyne (11.0 mmol) in 20 mL of THF,  $n\text{-BuLi}$  (4.4 mL, 2.5 M, 11.0 mmol, 1.1 equiv) was added slowly at  $-78\text{ }^\circ\text{C}$  under argon atmosphere. The reaction mixture was stirred for additional 30 mins, then **S-1** (10.0 mmol) was added to the above reaction mixture, and the reaction mixture was stirred for 8 h under these conditions. The reaction was quenched with saturated  $\text{NH}_4\text{Cl}$  (20 mL). The organic phase was separated, and the aqueous layer was extracted with DCM ( $3 \times 20\text{ mL}$ ). The combined organic layer was washed with brine (30 mL), dried over anhydrous  $\text{MgSO}_4$  and concentrated in *vacuo* after filtration. The residue was purified by column chromatography on silica gel (eluted with petroleum ether/ethyl acetate = 5:1) to afford pure products **S-2** in >85% yields.

**Synthesis of 1:**<sup>1</sup> To a 50-mL oven-dried flask containing a magnetic stirring bar, and **S-2** (5.0 mmol) in DCM (10 mL), MnO<sub>2</sub> (6.521 g, 75.0 mmol) was added at room temperature. The resulting reaction mixture was stirred for 5 - 15 mins. After **S-2** was completely consumed (monitored by TLC), the reaction mixture was filtered through a short pad of Celite and concentrated *in vacuo* after filtration. The residue was purified by column chromatography on silica gel (eluted with petroleum ether/ethyl acetate = 30:1) to give **1** in >80% yields.

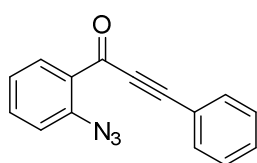

**1-(2-Azidophenyl)-3-phenylprop-2-yn-1-one (1a).** Yellow solid; mp: 62-65 °C. <sup>1</sup>H NMR (400 MHz, CDCl<sub>3</sub>) (δ, ppm) 8.19 – 8.13 (m, 1H), 7.67 – 7.62 (m, 2H), 7.61 – 7.56 (m, 1H), 7.49 – 7.45 (m, 1H), 7.44 – 7.37 (m, 2H), 7.30 – 7.23 (m, 2H). <sup>13</sup>C NMR (100 MHz, CDCl<sub>3</sub>) δ 176.2, 140.3, 134.4, 133.22, 133.18, 131.0, 129.2, 129.0, 128.8, 124.7, 120.3, 93.5, 88.4. HRMS (TOF MS Cl<sup>+</sup>) calculated for C<sub>15</sub>H<sub>9</sub>N<sub>3</sub>NaO<sup>+</sup> [M+Na]<sup>+</sup>: 270.0638, found 270.0642.

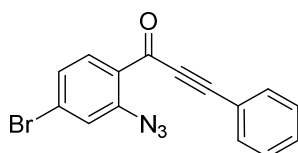

**1-(2-Azido-4-bromophenyl)-3-phenylprop-2-yn-1-one (1b).** Yellow solid; mp: 91-93 °C. <sup>1</sup>H NMR (400 MHz, CDCl<sub>3</sub>) (δ, ppm) 8.00 (d, *J* = 8.2 Hz, 1H), 7.65 – 7.60 (m, 2H), 7.50 – 7.44 (m, 1H), 7.43 – 7.35 (comp, 4H). <sup>13</sup>C NMR (100 MHz, CDCl<sub>3</sub>) δ 175.1, 141.6, 134.3, 133.3, 131.2, 129.0, 128.9, 128.1, 127.8, 123.4, 120.1, 94.0, 88.3. HRMS (TOF MS Cl<sup>+</sup>) calculated for C<sub>15</sub>H<sub>8</sub>BrN<sub>3</sub>NaO<sup>+</sup> [M+Na]<sup>+</sup>: 347.9743, found 347.9745.

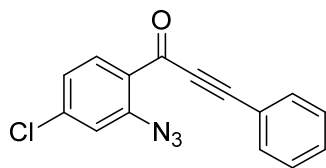

**1-(2-Azido-4-chlorophenyl)-3-phenylprop-2-yn-1-one (1c).** Yellow solid; mp: 73-75 °C.  $^1\text{H}$  NMR (400 MHz,  $\text{CDCl}_3$ ) ( $\delta$ , ppm) 8.09 (d,  $J = 8.3$  Hz, 1H), 7.65 – 7.60 (m, 2H), 7.50 – 7.45 (m, 1H), 7.41 (t,  $J = 7.4$  Hz, 2H), 7.25 – 7.20 (m, 2H).  $^{13}\text{C}$  NMR (100 MHz,  $\text{CDCl}_3$ )  $\delta$  174.9, 141.6, 140.5, 134.3, 133.2, 131.1, 128.8, 127.3, 125.0, 120.4, 120.0, 93.9, 88.2. HRMS (TOF MS  $\text{Cl}^+$ ) calculated for  $\text{C}_{15}\text{H}_8\text{ClN}_3\text{NaO}^+$   $[\text{M}+\text{Na}]^+$ : 304.0248, found 304.0249.

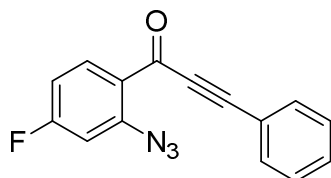

**1-(2-Azido-4-fluorophenyl)-3-phenylprop-2-yn-1-one (1d).** Yellow solid; mp: 58-60 °C.  $^1\text{H}$  NMR (400 MHz,  $\text{CDCl}_3$ ) ( $\delta$ , ppm) 8.21 (m,  $J = 9.2, 6.3$  Hz, 1H), 7.66 – 7.60 (m, 2H), 7.51 – 7.45 (m, 1H), 7.41 – 7.39 (m, 2H), 7.00 – 6.90 (m, 2H).  $^{13}\text{C}$  NMR (100 MHz,  $\text{CDCl}_3$ )  $\delta$  174.7, 166.0 (d,  $J = 258.0$  Hz), 143.0 (d,  $J = 9.5$  Hz), 135.8 (d,  $J = 10.5$  Hz), 133.2, 131.0, 128.8, 125.5, 120.1, 112.2 (d,  $J = 21.7$  Hz), 107.7 (d,  $J = 25.1$  Hz), 93.6, 88.2.  $^{19}\text{F}$  NMR (376 MHz,  $\text{CDCl}_3$ )  $\delta$  -102.0. HRMS (TOF MS  $\text{Cl}^+$ ) calculated for  $\text{C}_{15}\text{H}_8\text{FN}_3\text{NaO}^+$   $[\text{M}+\text{Na}]^+$ : 288.0544, found 288.0540.

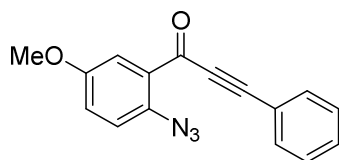

**1-(2-Azido-5-methoxyphenyl)-3-phenylprop-2-yn-1-one (1e).** Yellow solid; mp: 68-70 °C.  $^1\text{H}$  NMR (400 MHz,  $\text{CDCl}_3$ ) ( $\delta$ , ppm) 7.65 – 7.59 (comp, 3H), 7.48 – 7.42 (m, 1H), 7.41 – 7.36 (m, 2H), 7.18 – 7.09 (m, 2H), 3.83 (s, 3H).  $^{13}\text{C}$  NMR (100 MHz,  $\text{CDCl}_3$ )  $\delta$  175.7, 156.5, 133.1, 132.7, 131.0, 129.6, 128.7, 121.5, 120.9, 120.2, 116.6, 93.7, 88.5, 55.8. HRMS (TOF MS  $\text{Cl}^+$ ) calculated for  $\text{C}_{16}\text{H}_{11}\text{N}_3\text{NaO}_2^+$   $[\text{M}+\text{Na}]^+$ :

300.0743, found 300.0750.

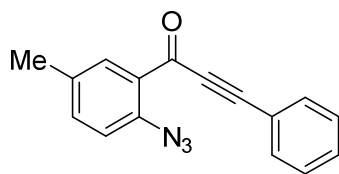

**1-(2-Azido-5-methylphenyl)-3-phenylprop-2-yn-1-one (1f).** Yellow solid; mp: 69-71 °C.  $^1\text{H}$  NMR (400 MHz,  $\text{CDCl}_3$ ) ( $\delta$ , ppm) 7.92 (d,  $J = 1.4$  Hz, 1H), 7.67 – 7.60 (m, 2H), 7.51 – 7.44 (m, 1H), 7.43 – 7.35 (comp, 3H), 7.15 (d,  $J = 8.2$  Hz, 1H), 2.40 (s, 3H).  $^{13}\text{C}$  NMR (100 MHz,  $\text{CDCl}_3$ )  $\delta$  176.2, 137.5, 135.1, 134.6, 133.3, 133.1, 130.9, 128.74, 128.71, 120.3, 120.2, 93.3, 88.5, 20.8. HRMS (TOF MS  $\text{Cl}^+$ ) calculated for  $\text{C}_{16}\text{H}_{11}\text{N}_3\text{NaO}^+ [\text{M}+\text{Na}]^+$ : 284.0794, found 284.0797.

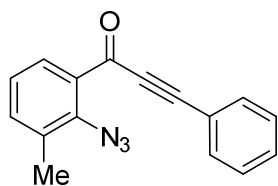

**1-(2-Azido-3-methylphenyl)-3-phenylprop-2-yn-1-one (1g).** Yellow solid; mp: 70-72 °C.  $^1\text{H}$  NMR (400 MHz,  $\text{CDCl}_3$ ) ( $\delta$ , ppm) 8.10 (d,  $J = 7.8, 1.0$  Hz, 1H), 7.66 – 7.61 (m, 2H), 7.45 (d,  $J = 6.4, 3.7, 1.3$  Hz, 1H), 7.41 – 7.35 (m, 3H), 7.22 (t,  $J = 7.7$  Hz, 1H), 2.36 (s, 3H).  $^{13}\text{C}$  NMR (100 MHz,  $\text{CDCl}_3$ )  $\delta$  176.8, 138.6, 135.9, 133.7, 133.1, 131.3, 130.9, 130.7, 128.7, 125.1, 120.0, 93.0, 88.0, 18.1. HRMS (TOF MS  $\text{Cl}^+$ ) calculated for  $\text{C}_{16}\text{H}_{12}\text{N}_3\text{O}^+ [\text{M}+\text{H}]^+$ : 262.0975, found 262.0981.

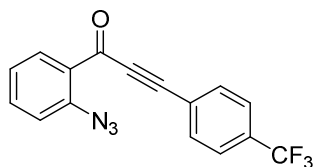

**1-(2-Azidophenyl)-3-(4-(trifluoromethyl)phenyl)prop-2-yn-1-one (1h).** Yellow oil.  $^1\text{H}$  NMR (400 MHz,  $\text{CDCl}_3$ ) ( $\delta$ , ppm) 8.16 – 8.10 (m, 1H), 7.74 (d,  $J = 8.1$  Hz, 2H), 7.65 (d,  $J = 8.2$  Hz, 2H), 7.63 – 7.57 (m, 1H), 7.30 – 7.23 (m, 2H).  $^{13}\text{C}$  NMR (100

MHz, CDCl<sub>3</sub>)  $\delta$  175.6, 140.5, 136.0, 134.7, 133.21, 133.15, 132.3 (q,  $J$  = 33.0 Hz), 128.5, 125.8 (q,  $J$  = 3.7 Hz), 124.8 (q,  $J$  = 237.1 Hz), 124.7, 120.3, 90.8, 89.5. <sup>19</sup>F NMR (376 MHz, CDCl<sub>3</sub>)  $\delta$  -63.1. HRMS (TOF MS Cl<sup>+</sup>) calculated for C<sub>16</sub>H<sub>8</sub>F<sub>3</sub>N<sub>3</sub>NaO<sup>+</sup> [M+Na]<sup>+</sup>: 338.0512, found 338.0500.

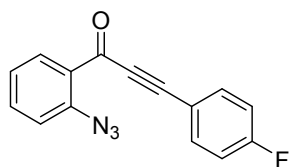

**1-(2-Azidophenyl)-3-(4-fluorophenyl)prop-2-yn-1-one (1i).** Yellow solid; mp: 82-84 °C. <sup>1</sup>H NMR (400 MHz, CDCl<sub>3</sub>) ( $\delta$ , ppm) 8.16 – 8.10 (m, 1H), 7.66 – 7.55 (comp, 3H), 7.30 – 7.23 (m, 2H), 7.13 – 7.06 (m, 2H). <sup>13</sup>C NMR (100 MHz, CDCl<sub>3</sub>)  $\delta$  176.0, 164.1 (d,  $J$  = 254.0 Hz), 140.3, 135.4 (d,  $J$  = 8.9 Hz), 134.4, 133.1, 128.9, 124.7, 120.3, 116.4 (d,  $J$  = 3.6 Hz), 116.3 (d,  $J$  = 22.4 Hz), 92.3, 88.4. <sup>19</sup>F NMR (376 MHz, CDCl<sub>3</sub>)  $\delta$  -105.9. HRMS (TOF MS Cl<sup>+</sup>) calculated for C<sub>15</sub>H<sub>8</sub>FN<sub>3</sub>NaO<sup>+</sup> [M+Na]<sup>+</sup>: 288.0544, found 288.0552.

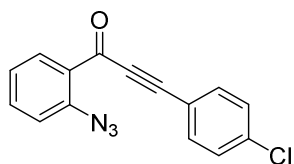

**1-(2-Azidophenyl)-3-(4-chlorophenyl)prop-2-yn-1-one (1j).** Yellow solid; mp: 86-88 °C. <sup>1</sup>H NMR (400 MHz, CDCl<sub>3</sub>) ( $\delta$ , ppm) 8.16 – 8.09 (m, 1H), 7.61 – 7.53 (comp, 3H), 7.38 (d,  $J$  = 8.5 Hz, 2H), 7.26 (t,  $J$  = 8.4 Hz, 2H). <sup>13</sup>C NMR (100 MHz, CDCl<sub>3</sub>)  $\delta$  175.9, 140.3, 137.3, 134.5, 134.3, 133.1, 129.2, 128.8, 124.7, 120.3, 118.7, 92.0, 89.1. HRMS (TOF MS Cl<sup>+</sup>) calculated for C<sub>15</sub>H<sub>8</sub>ClN<sub>3</sub>NaO<sup>+</sup> [M+Na]<sup>+</sup>: 304.0248, found 304.0254.

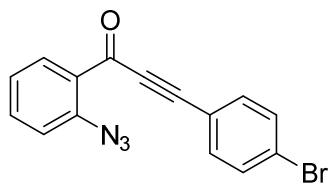

**1-(2-Azidophenyl)-3-(4-bromophenyl)prop-2-yn-1-one (1k).** Yellow solid; mp: 85-88 °C. <sup>1</sup>H NMR (400 MHz, CDCl<sub>3</sub>) (δ, ppm) 8.17 – 8.09 (m, 1H), 7.63 – 7.56 (m, 1H), 7.56 – 7.52 (m, 2H), 7.51 – 7.46 (m, 2H), 7.30 – 7.23 (m, 2H). <sup>13</sup>C NMR (100 MHz, CDCl<sub>3</sub>) δ 175.7, 140.2, 134.4, 134.3, 133.1, 132.1, 128.6, 125.7, 124.6, 120.2, 119.1, 91.9, 89.1. HRMS (TOF MS CI<sup>+</sup>) calculated for C<sub>15</sub>H<sub>8</sub>BrN<sub>3</sub>NaO<sup>+</sup> [M+Na]<sup>+</sup>: 347.9743, found 347.9744.

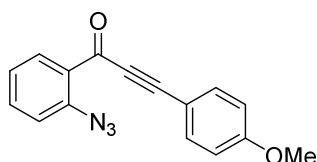

**1-(2-Azidophenyl)-3-(4-methoxyphenyl)prop-2-yn-1-one (1l).** Yellow solid; mp: 78-81 °C. <sup>1</sup>H NMR (400 MHz, CDCl<sub>3</sub>) (δ, ppm) 8.16 (d, *J* = 7.7 Hz, 1H), 7.63 – 7.58 (comp, 3H), 7.28 (t, *J* = 7.9 Hz, 2H), 6.94 (d, *J* = 8.5 Hz, 2H), 3.87 (s, 3H). <sup>13</sup>C NMR (100 MHz, CDCl<sub>3</sub>) δ 176.2, 161.9, 140.1, 135.3, 134.1, 133.0, 129.3, 124.7, 120.2, 114.5, 112.0, 94.8, 88.5, 55.6. HRMS (TOF MS CI<sup>+</sup>) calculated for C<sub>16</sub>H<sub>11</sub>N<sub>3</sub>NaO<sub>2</sub><sup>+</sup> [M+Na]<sup>+</sup>: 300.0743, found 300.0730.

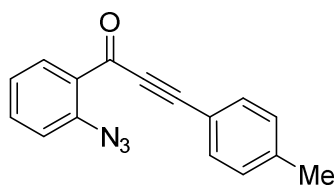

**1-(2-Azidophenyl)-3-(*p*-tolyl)prop-2-yn-1-one (1m).** Yellow solid; mp: 76-78 °C. <sup>1</sup>H NMR (400 MHz, CDCl<sub>3</sub>) (δ, ppm) 7.92 (d, *J* = 1.4 Hz, 1H), 7.67 – 7.60 (m, 2H), 7.51 – 7.44 (m, 1H), 7.43 – 7.35 (comp, 3H), 7.15 (d, *J* = 8.2 Hz, 1H), 2.40 (s, 3H). <sup>13</sup>C NMR (100 MHz, CDCl<sub>3</sub>) δ 176.2, 141.7, 140.1, 134.2, 133.2, 133.1, 129.6, 129.1, 124.6, 120.2, 117.1, 94.1, 88.3, 21.8. HRMS (TOF MS CI<sup>+</sup>) calculated for C<sub>16</sub>H<sub>11</sub>N<sub>3</sub>NaO<sup>+</sup> [M+Na]<sup>+</sup>: 284.0794, found 284.0797.

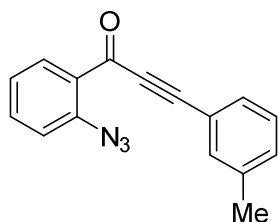

**1-(2-Azidophenyl)-3-(*m*-tolyl)prop-2-yn-1-one (1n).** Yellow oil.  $^1\text{H}$  NMR (400 MHz,  $\text{CDCl}_3$ ) ( $\delta$ , ppm) 8.16 – 8.11 (m, 1H), 7.58 – 7.51 (m, 1H), 7.43 – 7.38 (m, 2H), 7.27 – 7.19 (comp, 4H), 2.33 (s, 3H).  $^{13}\text{C}$  NMR (100 MHz,  $\text{CDCl}_3$ )  $\delta$  175.8, 139.9, 138.4, 134.2, 133.4, 133.0, 131.7, 130.1, 128.6, 128.5, 124.5, 120.1, 119.7, 93.6, 88.0, 21.0. HRMS (TOF MS  $\text{Cl}^+$ ) calculated for  $\text{C}_{16}\text{H}_{11}\text{N}_3\text{NaO}^+$   $[\text{M}+\text{Na}]^+$ : 284.0794, found 284.0784.

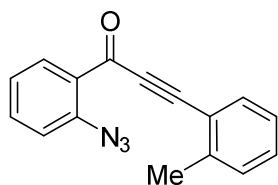

**1-(2-Azidophenyl)-3-(*o*-tolyl)prop-2-yn-1-one (1o).** Yellow oil.  $^1\text{H}$  NMR (400 MHz,  $\text{CDCl}_3$ ) ( $\delta$ , ppm) 8.21 – 8.10 (m, 1H), 7.64 – 7.53 (m, 2H), 7.39 – 7.33 (m, 1H), 7.30 – 7.18 (comp, 4H), 2.55 (s, 3H).  $^{13}\text{C}$  NMR (100 MHz,  $\text{CDCl}_3$ )  $\delta$  176.2, 142.3, 140.2, 134.2, 133.8, 133.0, 131.0, 130.0, 129.2, 126.0, 124.7, 120.2, 120.1, 92.6, 92.3, 20.8. HRMS (TOF MS  $\text{Cl}^+$ ) calculated for  $\text{C}_{16}\text{H}_{11}\text{N}_3\text{NaO}^+$   $[\text{M}+\text{Na}]^+$ : 284.0794, found 284.0804.

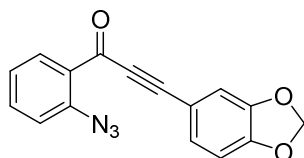

**1-(2-Azidophenyl)-3-(benzo[*d*][1,3]dioxol-5-yl)prop-2-yn-1-one (1p).** Yellow solid; mp: 124-126 °C.  $^1\text{H}$  NMR (400 MHz,  $\text{CDCl}_3$ ) ( $\delta$ , ppm) 8.36 – 8.31 (m, 1H), 7.79 – 7.77 (m, 1H), 7.49 – 7.46 (m, 2H), 7.45 – 7.41 (m, 1H), 7.26 (d,  $J$  = 1.6 Hz, 1H), 7.04 (d,  $J$  = 8.0 Hz, 1H), 6.24 (s, 2H).  $^{13}\text{C}$  NMR (100 MHz,  $\text{CDCl}_3$ )  $\delta$  176.1, 150.4, 147.9, 140.2, 134.2, 133.0, 129.3, 129.1, 124.7, 120.2, 113.2, 112.7, 109.0, 102.0, 94.3, 87.9.



HRMS (TOF MS  $\text{Cl}^+$ ) calculated for  $\text{C}_{16}\text{H}_9\text{N}_3\text{NaO}_3^+$   $[\text{M}+\text{Na}]^+$ : 314.0536, found 314.0540.

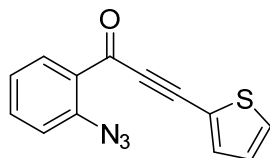

**1-(2-Azidophenyl)-3-(thiophen-2-yl)prop-2-yn-1-one (1q).** Yellow oil.  $^1\text{H}$  NMR (400 MHz,  $\text{CDCl}_3$ ) ( $\delta$ , ppm) 8.10 – 8.03 (m, 1H), 7.59 – 7.47 (comp, 3H), 7.27 – 7.20 (m, 2H), 7.09 – 7.02 (m, 1H).  $^{13}\text{C}$  NMR (100 MHz,  $\text{CDCl}_3$ )  $\delta$  175.4, 140.2, 136.8, 134.3, 132.7, 132.0, 128.6, 127.9, 124.6, 120.1, 120.0, 93.3, 87.6. HRMS (TOF MS  $\text{Cl}^+$ ) calculated for  $\text{C}_{13}\text{H}_7\text{N}_3\text{OS}$   $[\text{M}+\text{Na}]^+$ : 276.0202, found 276.0208.

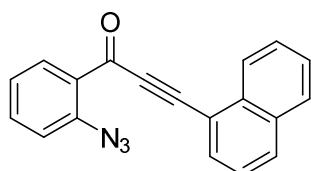

**1-(2-Azidophenyl)-3-(naphthalen-1-yl)prop-2-yn-1-one (1r).** Yellow solid; mp: 59-61 °C.  $^1\text{H}$  NMR (400 MHz,  $\text{CDCl}_3$ ) ( $\delta$ , ppm) 8.42 (d,  $J = 8.3$  Hz, 1H), 8.24 – 8.21 (m, 1H), 7.96 (d,  $J = 8.2$  Hz, 1H), 7.92 – 7.88 (m, 2H), 7.64 – 7.54 (comp, 3H), 7.49 (t,  $J = 7.7$  Hz, 1H), 7.29 (t,  $J = 7.8$  Hz, 2H).  $^{13}\text{C}$  NMR (100 MHz,  $\text{CDCl}_3$ )  $\delta$  176.0, 140.2, 134.3, 133.8, 133.4, 133.1, 132.9, 131.7, 129.2, 128.7, 127.8, 127.0, 125.8, 125.3, 124.7, 120.2, 117.9, 93.3, 92.0. HRMS (TOF MS  $\text{Cl}^+$ ) calculated for  $\text{C}_{19}\text{H}_{11}\text{N}_3\text{NaO}^+$   $[\text{M}+\text{Na}]^+$ : 320.0794, found 320.0783.

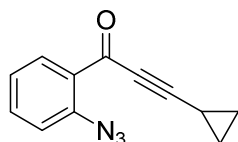

**1-(2-Azidophenyl)-3-cyclopropylprop-2-yn-1-one (1s).** Yellow oil.  $^1\text{H}$  NMR (400 MHz,  $\text{CDCl}_3$ ) ( $\delta$ , ppm) 7.99 – 7.91 (m, 1H), 7.51 – 7.41 (m, 1H), 7.19 – 7.10 (m, 2H), 1.49 – 1.40 (m, 1H), 1.01 – 0.89 (comp, 4H).  $^{13}\text{C}$  NMR (100 MHz,  $\text{CDCl}_3$ )  $\delta$  175.9,

139.6, 133.8, 132.9, 128.9, 124.4, 120.0, 101.5, 76.9, 9.9. HRMS (TOF MS  $\text{Cl}^+$ ) calculated for  $\text{C}_{12}\text{H}_9\text{N}_3\text{NaO}^+$   $[\text{M}+\text{Na}]^+$ : 234.0638, found 234.0654.

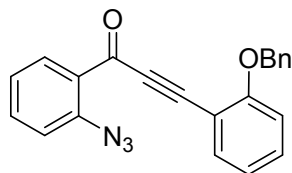

**1-(2-Azidophenyl)-3-(2-(benzyloxy)phenyl)prop-2-yn-1-one (1t).** Yellow solid; mp: 100-102 °C.  $^1\text{H}$  NMR (400 MHz,  $\text{CDCl}_3$ ) ( $\delta$ , ppm) 8.29 – 8.16 (m, 1H), 7.65 – 7.58 (m, 1H), 7.54 – 7.32 (comp, 7H), 7.18 (d,  $J = 7.9$  Hz, 1H), 7.04 – 6.93 (m, 2H), 6.89 – 6.77 (m, 1H), 5.16 (s, 2H).  $^{13}\text{C}$  NMR (100 MHz,  $\text{CDCl}_3$ )  $\delta$  176.2, 161.0, 140.0, 136.2, 135.3, 134.2, 134.0, 132.7, 128.72, 128.68, 128.2, 127.6, 124.5, 121.1, 120.1, 112.3, 109.9, 92.5, 90.3, 70.6. HRMS (TOF MS  $\text{Cl}^+$ ) calculated for  $\text{C}_{22}\text{H}_{15}\text{N}_3\text{NaO}_2^+$   $[\text{M}+\text{Na}]^+$ : 376.1056, found 376.1041.

## Reactions of Nitriles with Azide Alkynes

To a 10-mL oven-dried vial containing a magnetic stirring bar, azide alkynes **1** (0.2 mmol),  $\text{AuCl}_3$  (2.3 mg, 5.0 mol %), and nitriles **2** (1.0 mL) were added in sequence at room temperature under argon atmosphere. The resulting reaction mixture was stirred for 12 h under these conditions. When the reaction was completed (monitored by TLC). Then the solvent was evaporated *in vacuo* and the residue was purified by flash column chromatography on silica gel without additional treatment (hexanes/ethyl acetate = 80:1 to 5:1) to afford the pure products **3** in good to high yields.

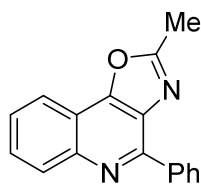

**2-Methyl-4-phenyloxazolo[4,5-c]quinoline (3a).** 49.4 mg, 95% yield. Yellow solid;

mp: 150-152 °C.  $^1\text{H}$  NMR (400 MHz,  $\text{CDCl}_3$ ) ( $\delta$ , ppm) 8.70 – 8.64 (m, 2H), 8.27 (d,  $J$  = 8.5 Hz, 1H), 8.10 – 8.08 (m, 1H), 7.73 – 7.69 (m, 1H), 7.62 – 7.55 (comp, 3H), 7.54 – 7.47 (m, 1H), 2.77 (s, 3H).  $^{13}\text{C}$  NMR (100 MHz,  $\text{CDCl}_3$ )  $\delta$  163.1, 153.1, 150.4, 145.5, 137.2, 133.3, 130.1, 129.9, 129.4, 128.9, 128.7, 126.8, 119.9, 115.6, 14.7. HRMS (TOF MS  $\text{Cl}^+$ ) calculated for  $\text{C}_{17}\text{H}_{13}\text{N}_2\text{O}^+$   $[\text{M}+\text{H}]^+$ : 261.1028, found 261.1028.

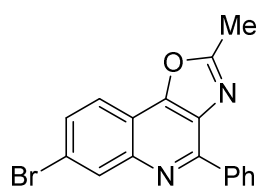

**7-Bromo-2-methyl-4-phenyloxazolo[4,5-c]quinoline (3b).** 59.7 mg, 88% yield. Yellow solid; mp: 202-204 °C.  $^1\text{H}$  NMR (400 MHz,  $\text{CDCl}_3$ ) ( $\delta$ , ppm) 8.67 – 8.61 (m, 2H), 8.39 (d,  $J$  = 1.9 Hz, 1H), 7.89 (d,  $J$  = 8.7 Hz, 1H), 7.64 – 7.61 (m, 1H), 7.59 – 7.55 (m, 2H), 7.54 – 7.47 (m, 1H), 2.74 (s, 3H).  $^{13}\text{C}$  NMR (100 MHz,  $\text{CDCl}_3$ )  $\delta$  163.4, 152.9, 151.2, 145.9, 136.8, 133.5, 132.4, 130.2, 130.1, 129.5, 128.7, 122.8, 121.2, 114.2, 14.7. HRMS (TOF MS  $\text{Cl}^+$ ) calculated for  $\text{C}_{17}\text{H}_{12}\text{BrN}_2\text{O}^+$   $[\text{M}+\text{H}]^+$ : 339.0133, found 339.0124.

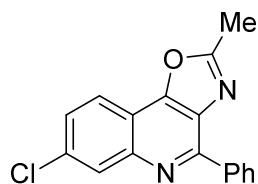

**7-Chloro-2-methyl-4-phenyloxazolo[4,5-c]quinoline (3c).** 47.7 mg, 81% yield. Yellow solid; mp: 197-199 °C.  $^1\text{H}$  NMR (400 MHz,  $\text{CDCl}_3$ ) ( $\delta$ , ppm) 8.67 – 8.62 (m, 2H), 8.21 (d,  $J$  = 2.0 Hz, 1H), 7.96 (d,  $J$  = 8.7 Hz, 1H), 7.60 – 7.54 (m, 2H), 7.54 – 7.47 (m, 2H), 2.75 (s, 3H).  $^{13}\text{C}$  NMR (100 MHz,  $\text{CDCl}_3$ )  $\delta$  163.4, 152.9, 151.3, 145.74, 136.8, 134.7, 133.4, 130.2, 129.5, 129.1, 128.7, 127.7, 121.2, 113.9, 14.6. HRMS (TOF MS  $\text{Cl}^+$ ) calculated for  $\text{C}_{17}\text{H}_{12}\text{ClN}_2\text{O}^+$   $[\text{M}+\text{H}]^+$ : 295.0638, found 295.0634.

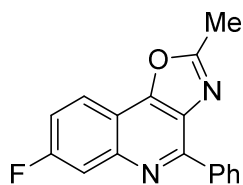

**7-Fluoro-2-methyl-4-phenyloxazolo[4,5-c]quinoline (3d).** 47.3 mg, 85% yield. White solid; mp: 189-191 °C. <sup>1</sup>H NMR (400 MHz, CDCl<sub>3</sub>) (δ, ppm) 8.68 – 8.61 (m, 2H), 8.07 – 8.03 (m, 1H), 7.89 – 7.85 (m, 1H), 7.61 – 7.54 (m, 2H), 7.54 – 7.48 (m, 1H), 7.40 – 7.32 (m, 1H), 2.76 (s, 3H). <sup>13</sup>C NMR (100 MHz, CDCl<sub>3</sub>) δ 162.8 (d, *J* = 248.6 Hz), 163.0, 153.2, 151.5, 146.5 (d, *J* = 12.7 Hz), 136.9, 132.8, 130.2, 129.5, 128.7, 121.9 (d, *J* = 9.9 Hz), 117.1 (d, *J* = 25.7 Hz), 114.1 (d, *J* = 20.9 Hz), 112.6, 14.6. <sup>19</sup>F NMR (376 MHz, CDCl<sub>3</sub>) δ -110.3. HRMS (TOF MS Cl<sup>+</sup>) calculated for C<sub>18</sub>H<sub>11</sub>ClN<sub>2</sub>O<sup>+</sup> [M+H]<sup>+</sup>: 279.0928, found 279.0932.

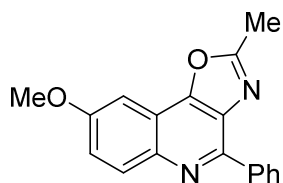

**8-Methoxy-2-methyl-4-phenyloxazolo[4,5-c]quinoline (3e).** 25.5 mg, 44% yield. Yellow solid; mp: 201-203 °C. <sup>1</sup>H NMR (400 MHz, CDCl<sub>3</sub>) (δ, ppm) 8.64 – 8.59 (m, 2H), 8.17 (d, *J* = 10.1 Hz, 1H), 7.60 – 7.53 (m, 2H), 7.47 (t, *J* = 7.4 Hz, 1H), 7.36 (d, *J* = 7.8 Hz, 2H), 3.99 (s, 3H), 2.80 (s, 3H). <sup>13</sup>C NMR (100 MHz, CDCl<sub>3</sub>) δ 163.1, 158.4, 152.6, 147.9, 141.5, 137.4, 133.6, 131.8, 129.6, 129.2, 128.7, 121.4, 116.4, 98.2, 55.9, 14.8. HRMS (TOF MS Cl<sup>+</sup>) calculated for C<sub>18</sub>H<sub>15</sub>N<sub>2</sub>O<sub>2</sub><sup>+</sup> [M+H]<sup>+</sup>: 291.1134, found 291.1134.

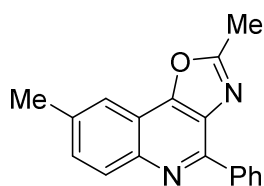

**2,8-Dimethyl-4-phenyloxazolo[4,5-c]quinoline (3f).** 42.2 mg, 77% yield. Yellow

solid; mp: 165-167 °C.  $^1\text{H}$  NMR (400 MHz,  $\text{CDCl}_3$ ) ( $\delta$ , ppm) 8.64 (d,  $J = 7.2$  Hz, 2H), 8.13 (d,  $J = 8.7$  Hz, 1H), 7.81 (s, 1H), 7.58 (t,  $J = 7.6$  Hz, 2H), 7.54 – 7.46 (m, 2H), 2.73 (s, 3H), 2.55 (s, 3H).  $^{13}\text{C}$  NMR (100 MHz,  $\text{CDCl}_3$ )  $\delta$  162.9, 152.6, 149.4, 144.0, 137.3, 137.0, 133.3, 131.0, 129.8, 129.7, 129.3, 128.6, 118.9, 115.5, 21.8, 14.6. HRMS (TOF MS  $\text{Cl}^+$ ) calculated for  $\text{C}_{18}\text{H}_{15}\text{N}_2\text{O}^+$   $[\text{M}+\text{H}]^+$ : 275.1184, found 275.1181.

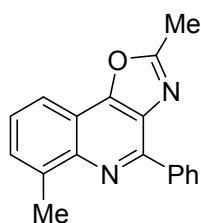

**2,6-Dimethyl-4-phenyloxazolo[4,5-c]quinoline (3g).** 25.8 mg, 47% yield. White solid; mp: 155-157 °C.  $^1\text{H}$  NMR (400 MHz,  $\text{CDCl}_3$ ) ( $\delta$ , ppm) 8.83 – 8.77 (m, 2H), 7.98 (d,  $J = 8.1$  Hz, 1H), 7.61 – 7.55 (comp, 3H), 7.53 – 7.46 (m, 2H), 2.95 (s, 3H), 2.80 (s, 3H).  $^{13}\text{C}$  NMR (100 MHz,  $\text{CDCl}_3$ )  $\delta$  163.0, 153.5, 148.4, 144.3, 138.4, 137.8, 133.2, 129.8, 129.5, 129.2, 128.7, 126.7, 117.8, 115.6, 18.9, 14.8. HRMS (TOF MS  $\text{Cl}^+$ ) calculated for  $\text{C}_{18}\text{H}_{15}\text{N}_2\text{O}^+$   $[\text{M}+\text{H}]^+$ : 275.1184, found 275.1186.

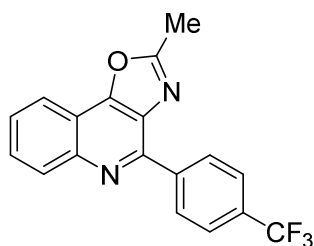

**2-Methyl-4-(4-(trifluoromethyl)phenyl)oxazolo[4,5-c]quinoline (3h).** 58.0 mg, 89% yield. White solid; mp: 150-153 °C.  $^1\text{H}$  NMR (400 MHz,  $\text{CDCl}_3$ ) ( $\delta$ , ppm) 8.85 – 8.74 (m, 2H), 8.27 – 8.18 (m, 1H), 8.08 – 8.05 (m, 1H), 7.80 (d,  $J = 8.1$  Hz, 2H), 7.71 (m, 1H), 7.60 (m, 1H), 2.75 (s, 3H).  $^{13}\text{C}$  NMR (100 MHz,  $\text{CDCl}_3$ )  $\delta$  163.4, 153.2, 148.4, 145.3, 140.4, 133.3, 131.4 (q,  $J = 32.3$  Hz), 130.2, 129.7, 129.1, 127.4, 125.5 (q,  $J = 3.9$  Hz), 124.4 (q,  $J = 272.2$  Hz), 120.0, 115.8, 14.6.  $^{19}\text{F}$  NMR (376 MHz,  $\text{CDCl}_3$ )  $\delta$  -62.7. HRMS (TOF MS  $\text{Cl}^+$ ) calculated for  $\text{C}_{18}\text{H}_{12}\text{F}_3\text{N}_2\text{O}^+$   $[\text{M}+\text{H}]^+$ :

329.0902, found 329.0902.

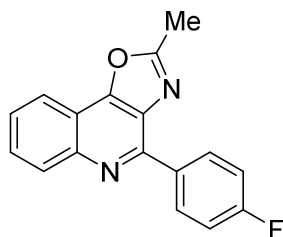

**4-(4-Fluorophenyl)-2-methyloxazolo[4,5-*c*]quinoline (3i).** 42.3 mg, 76% yield. Yellow solid; mp: 152-154 °C. <sup>1</sup>H NMR (400 MHz, CDCl<sub>3</sub>) (δ, ppm) 8.76 – 8.66 (m, 2H), 8.23 – 8.20 (m, 1H), 8.08 – 8.05 (m, 1H), 7.72 – 7.67 (m, 1H), 7.63 – 7.52 (m, 1H), 7.28 – 7.18 (m, 2H), 2.75 (s, 3H). <sup>13</sup>C NMR (100 MHz, CDCl<sub>3</sub>) δ 164.1 (d, *J* = 249.9 Hz), 163.1, 153.1, 149.1, 145.39, 133.4 (d, *J* = 2.9 Hz), 133.0, 131.5 (d, *J* = 8.4 Hz), 130.0, 128.9, 126.9, 120.0, 115.59 (d, *J* = 21.5 Hz), 115.56, 14.6. <sup>19</sup>F NMR (376 MHz, CDCl<sub>3</sub>) δ -111.3. HRMS (TOF MS CI<sup>+</sup>) calculated for C<sub>17</sub>H<sub>12</sub>FN<sub>2</sub>O<sup>+</sup> [M+H]<sup>+</sup>: 279.0934, found 279.0936.

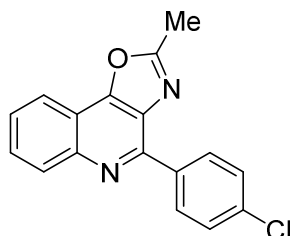

**4-(4-Chlorophenyl)-2-methyloxazolo[4,5-*c*]quinoline (3j).** 49.5 mg, 84% yield. Yellow solid; mp: 173-175 °C. <sup>1</sup>H NMR (400 MHz, CDCl<sub>3</sub>) (δ, ppm) 8.70 – 8.63 (m, 2H), 8.22 (d, *J* = 8.5 Hz, 1H), 8.10 – 8.07 (m, 1H), 7.73 – 7.69 (m, 1H), 7.61 – 7.57 (m, 1H), 7.56 – 7.50 (m, 2H), 2.77 (s, 3H). <sup>13</sup>C NMR (100 MHz, CDCl<sub>3</sub>) δ 163.2, 153.1, 148.9, 145.4, 136.1, 135.7, 133.1, 130.7, 130.1, 129.0, 128.8, 127.1, 120.0, 115.7, 14.7. HRMS (TOF MS CI<sup>+</sup>) calculated for C<sub>17</sub>H<sub>12</sub>ClN<sub>2</sub>O<sup>+</sup> [M+H]<sup>+</sup>: 295.0638, found 295.0642.

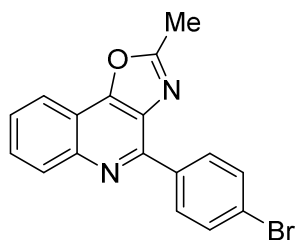

**4-(4-Bromophenyl)-2-methyloxazolo[4,5-c]quinoline (3k).** 55.6 mg, 82% yield. White solid; mp: 191-193 °C.  $^1\text{H}$  NMR (400 MHz,  $\text{CDCl}_3$ ) ( $\delta$ , ppm) 8.62 – 8.57 (m, 2H), 8.25 – 8.20 (m, 1H), 8.11– 8.09 (m, 1H), 7.74 – 7.66 (comp, 3H), 7.62– 7.59 (m, 1H), 2.78 (s, 3H).  $^{13}\text{C}$  NMR (100 MHz,  $\text{CDCl}_3$ )  $\delta$  163.3, 153.2, 149.0, 145.5, 136.1, 133.2, 131.9, 131.0, 130.2, 129.1, 127.1, 124.7, 120.1, 115.8, 14.7. HRMS (TOF MS  $\text{Cl}^+$ ) calculated for  $\text{C}_{17}\text{H}_{12}\text{BrN}_2\text{O}^+$   $[\text{M}+\text{H}]^+$ : 339.0133, found 339.0125.

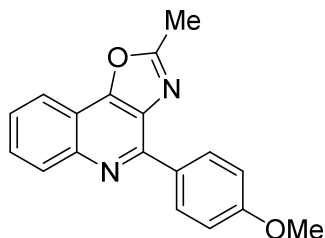

**4-(4-Methoxyphenyl)-2-methyloxazolo[4,5-c]quinoline (3l).** 29.0mg, 50% yield. White solid; mp: 132-134 °C.  $^1\text{H}$  NMR (400 MHz,  $\text{CDCl}_3$ ) ( $\delta$ , ppm) 8.72 – 8.64 (m, 2H), 8.23 – 8.21(m, 1H), 8.07 – 8.04 (m, 1H), 7.70 – 7.56 (m, 1H), 7.56 – 7.52 (m, 1H), 7.10 – 7.07 (m, 2H), 3.89 (s, 3H), 2.75 (s, 3H).  $^{13}\text{C}$  NMR (100 MHz,  $\text{CDCl}_3$ )  $\delta$  162.9, 161.2, 153.0, 150.0, 145.5, 133.0, 131.0, 129.9, 129.8, 128.8, 126.4, 119.9, 115.4, 114.0, 55.4, 14.6. HRMS (TOF MS  $\text{Cl}^+$ ) calculated for  $\text{C}_{18}\text{H}_{15}\text{N}_2\text{O}_2^+$   $[\text{M}+\text{H}]^+$ : 291.1128, found 291.1132.

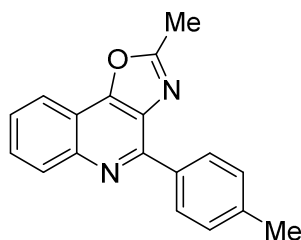

**2-Methyl-4-(p-tolyl)oxazolo[4,5-c]quinoline (3m).** 52.1 mg, 95% yield. Yellow solid;

mp: 140-142 °C.  $^1\text{H}$  NMR (400 MHz,  $\text{CDCl}_3$ ) ( $\delta$ , ppm) 8.64 – 8.55 (m, 2H), 8.26 – 8.24 (m, 1H), 8.09 – 8.06 (m, 1H), 7.72 – 7.67 (m, 1H), 7.58 – 7.54 (m, 1H), 7.42 – 7.36 (m, 2H), 2.76 (s, 3H), 2.46 (s, 3H).  $^{13}\text{C}$  NMR (100 MHz,  $\text{CDCl}_3$ )  $\delta$  162.9, 153.0, 150.5, 145.5, 140.0, 134.5, 133.2, 130.0, 129.4, 129.3, 128.8, 126.6, 119.9, 115.6, 21.6, 14.6. HRMS (TOF MS  $\text{Cl}^+$ ) calculated for  $\text{C}_{18}\text{H}_{15}\text{N}_2\text{O}^+$   $[\text{M}+\text{H}]^+$ : 275.1184, found 275.1178.

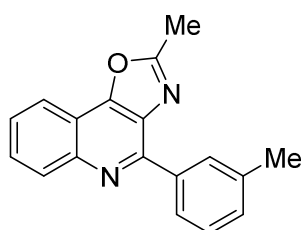

**2-Methyl-4-(*m*-tolyl)oxazolo[4,5-*c*]quinoline (3n).** 41.1 mg, 75% yield. White solid; mp: 114-116 °C.  $^1\text{H}$  NMR (400 MHz,  $\text{CDCl}_3$ ) ( $\delta$ , ppm) 8.51 – 8.42 (m, 2H), 8.30 – 8.27 (m, 1H), 8.13 – 8.11 (m, 1H), 7.74 – 7.70 (m, 1H), 7.62 – 7.58 (m, 1H), 7.49 – 7.45 (t,  $J = 7.6$  Hz, 1H), 7.33 – 7.30 (m, 1H), 2.79 (s, 3H), 2.52 (s, 3H).  $^{13}\text{C}$  NMR (100 MHz,  $\text{CDCl}_3$ )  $\delta$  163.1, 153.1, 150.8, 145.5, 138.3, 137.2, 133.4, 130.8, 130.2, 129.8, 128.9, 128.6, 126.9, 126.8, 120.0, 115.7, 21.8, 14.7. HRMS (TOF MS  $\text{Cl}^+$ ) calculated for  $\text{C}_{18}\text{H}_{15}\text{N}_2\text{O}^+$   $[\text{M}+\text{H}]^+$ : 275.1184, found 275.1185.

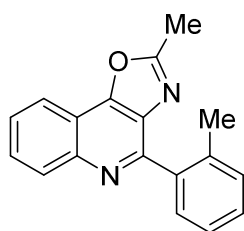

**2-Methyl-4-(*o*-tolyl)oxazolo[4,5-*c*]quinoline (3o).** 34.0 mg, 62% yield. Yellow solid; mp: 139-141 °C.  $^1\text{H}$  NMR (400 MHz,  $\text{CDCl}_3$ ) ( $\delta$ , ppm) 8.32 – 8.29 (m, 1H), 8.20 – 8.18 (m, 1H), 7.77 – 7.73 (m, 1H), 7.68 – 7.60 (m, 2H), 7.41 – 7.34 (comp, 3H), 2.76 (s, 3H), 2.39 (s, 3H).  $^{13}\text{C}$  NMR (100 MHz,  $\text{CDCl}_3$ )  $\delta$  163.6, 153.9, 152.5, 145.4, 136.9, 136.7, 134.2, 131.0, 130.3, 130.1, 129.3, 128.9, 127.1, 126.0, 120.0, 115.6, 20.4, 14.7. HRMS (TOF MS  $\text{Cl}^+$ ) calculated for  $\text{C}_{18}\text{H}_{15}\text{N}_2\text{O}^+$   $[\text{M}+\text{H}]^+$ : 275.1184, found 275.1188.



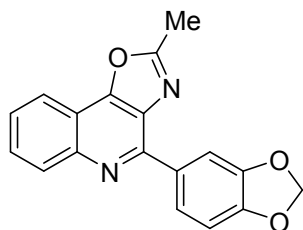

**4-(Benzo[d][1,3]dioxol-5-yl)-2-methyloxazolo[4,5-c]quinoline (3p).** 26.2 mg, 43% yield. Yellow solid; mp: 190-192 °C.  $^1\text{H}$  NMR (400 MHz,  $\text{CDCl}_3$ ) ( $\delta$ , ppm) 8.36 – 8.33 (m, 1H), 8.26 – 8.17 (m, 2H), 8.08 – 8.06 (m, 1H), 7.71 – 7.66 (m, 1H), 7.58 – 7.54 (m, 1H), 6.99 (d,  $J$  = 8.2 Hz, 1H), 6.04 (s, 2H), 2.77 (s, 3H).  $^{13}\text{C}$  NMR (100 MHz,  $\text{CDCl}_3$ )  $\delta$  162.9, 153.0, 149.6, 149.2, 148.1, 145.4, 132.9, 131.6, 129.9, 128.8, 126.6, 124.4, 119.9, 115.5, 109.5, 108.4, 101.4, 14.6. HRMS (TOF MS  $\text{Cl}^+$ ) calculated for  $\text{C}_{18}\text{H}_{13}\text{N}_2\text{O}_3^+$   $[\text{M}+\text{H}]^+$ : 305.0926, found 305.0920.

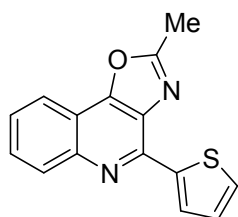

**2-Methyl-4-(thiophen-2-yl)oxazolo[4,5-c]quinoline (3q).** 44.2 mg, 83% yield. Yellow solid; mp: 114-115 °C.  $^1\text{H}$  NMR (400 MHz,  $\text{CDCl}_3$ ) ( $\delta$ , ppm) 8.61 – 8.57 (m, 1H), 8.17 (d,  $J$  = 8.5 Hz, 1H), 8.04 – 8.01 (m, 1H), 7.69 – 7.65 (m, 1H), 7.55 – 7.51 (m, 2H), 7.24 – 7.22 (m, 1H), 2.77 (s, 3H).  $^{13}\text{C}$  NMR (100 MHz,  $\text{CDCl}_3$ )  $\delta$  163.4, 152.7, 145.6, 145.5, 142.2, 131.8, 130.8, 129.6, 129.2, 128.9, 128.5, 126.6, 119.9, 115.5, 14.7. HRMS (TOF MS  $\text{Cl}^+$ ) calculated for  $\text{C}_{15}\text{H}_{11}\text{N}_2\text{OS}^+$   $[\text{M}+\text{H}]^+$ : 267.0587, found 267.0570.

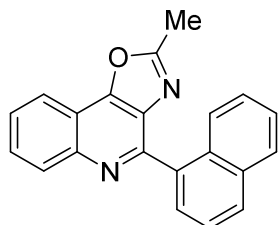

**2-Methyl-4-(naphthalen-1-yl)oxazolo[4,5-c]quinoline (3r).** 39.1 mg, 63% yield. Yellow solid; mp: 188-190 °C.  $^1\text{H}$  NMR (400 MHz,  $\text{CDCl}_3$ ) 8.35 (d,  $J$  = 8.5 Hz, 1H),

8.25 (d,  $J = 8.0$  Hz, 1H), 8.10 (d,  $J = 8.4$  Hz, 1H), 8.01 (d,  $J = 8.2$  Hz, 1H), 7.93 (t,  $J = 6.3$  Hz, 2H), 7.81 – 7.77 (m, 1H), 7.73 – 7.64 (m, 2H), 7.53 – 7.49 (m, 1H), 7.47 – 7.42 (m, 1H), 2.76 (s, 3H).  $^{13}\text{C}$  NMR (100 MHz,  $\text{CDCl}_3$ )  $\delta$  163.6, 152.9, 152.8, 145.5, 134.8, 134.4, 134.3, 131.6, 130.3, 129.9, 129.1, 128.9, 128.5, 127.3, 126.6, 126.0, 125.3, 120.1, 115.8, 14.7. HRMS (TOF MS  $\text{Cl}^+$ ) calculated for  $\text{C}_{21}\text{H}_{15}\text{N}_2\text{O}^+$   $[\text{M}+\text{H}]^+$ : 311.1184, found 311.1179.

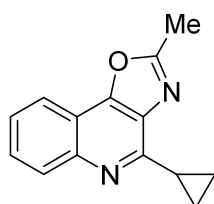

**4-Cyclopropyl-2-methyloxazolo[4,5-c]quinoline (3s).** 30.5 mg, 68% yield. White solid; mp: 94-96 °C.  $^1\text{H}$  NMR (400 MHz,  $\text{CDCl}_3$ ) ( $\delta$ , ppm) 8.07 – 8.01 (m, 2H), 7.64 – 7.60 (m, 1H), 7.52 – 7.48 (m, 1H), 2.80 – 2.72 (comp, 4H), 1.51 – 1.45 (m, 2H), 1.20 – 1.14 (m, 2H).  $^{13}\text{C}$  NMR (100 MHz,  $\text{CDCl}_3$ )  $\delta$  163.0, 157.4, 151.5, 145.6, 133.9, 129.2, 128.5, 125.8, 120.0, 115.2, 14.6, 14.3, 10.4. HRMS (TOF MS  $\text{Cl}^+$ ) calculated for  $\text{C}_{14}\text{H}_{13}\text{N}_2\text{O}^+$   $[\text{M}+\text{H}]^+$ : 225.1028, found 225.1027.

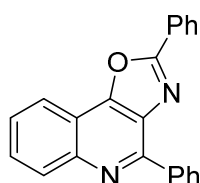

**2,4-Diphenyloxazolo[4,5-c]quinoline (3A).** 47.1 mg, 73% yield. Yellow solid; mp: 167-169 °C.  $^1\text{H}$  NMR (400 MHz,  $\text{CDCl}_3$ ) ( $\delta$ , ppm) 8.84 – 8.81 (m, 2H), 8.37– 8.35 (m, 2H), 8.29– 8.27 (d,  $J = 8.5$  Hz, 1H), 8.22– 8.20 (m, 1H), 7.75– 7.63 (m, 1H), 7.63– 7.60 (comp, 3H), 7.57 – 7.52 (comp, 4H).  $^{13}\text{C}$  NMR (100MHz,  $\text{CDCl}_3$ )  $\delta$  162.5, 152.9, 150.7, 145.8, 137.2, 134.1, 131.8, 130.3, 130.0, 129.7, 129.1, 128.7, 127.8, 126.9, 126.8, 120.2, 115.8. HRMS (TOF MS  $\text{Cl}^+$ ) calculated for  $\text{C}_{22}\text{H}_{15}\text{N}_2\text{O}^+$   $[\text{M}+\text{H}]^+$ : 323.1179, found 323.1185.

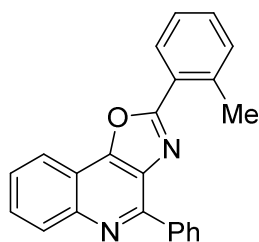

**4-Phenyl-2-(*o*-tolyl)oxazolo[4,5-*c*]quinoline (3B).** 41.7 mg, 62% yield. White solid; mp: 189-191 °C. <sup>1</sup>H NMR (400 MHz, CDCl<sub>3</sub>) (δ, ppm) 8.90 – 8.84 (m, 2H), 8.31 – 8.28 (m, 2H), 8.21 – 8.19 (m, 1H), 7.75 – 7.70 (m, 1H), 7.63 – 7.58 (comp, 3H), 7.55 – 7.51 (m, 1H), 7.45 – 7.35 (comp, 3H), 2.90 (s, 3H). <sup>13</sup>C NMR (100 MHz, CDCl<sub>3</sub>) δ 162.5, 152.3, 150.5, 145.7, 139.2, 137.2, 134.0, 132.1, 131.3, 130.3, 130.0, 129.8, 129.6, 129.0, 128.6, 126.9, 126.3, 125.6, 120.3, 115.7, 22.6. HRMS (TOF MS Cl<sup>+</sup>) calculated for C<sub>23</sub>H<sub>17</sub>N<sub>2</sub>O<sup>+</sup> [M+H]<sup>+</sup>: 337.1335, found 337.1333.

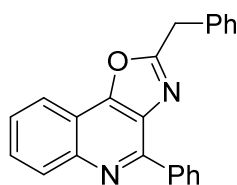

**2-Benzyl-4-phenyloxazolo[4,5-*c*]quinoline (3C).** 43.7 mg, 65% yield. Yellow solid; mp: 94-96 °C. <sup>1</sup>H NMR (400 MHz, CDCl<sub>3</sub>) (δ, ppm) 8.75 – 8.67 (m, 2H), 8.30 (d, *J* = 8.5 Hz, 1H), 8.15 – 8.12 (m, 1H), 7.75 – 7.71 (m, 1H), 7.63 – 7.57 (comp, 3H), 7.55 – 7.49 (m, 1H), 7.48 – 7.44 (m, 2H), 7.41 – 7.35 (m, 2H), 7.34 – 7.28 (m, 1H), 4.46 (s, 2H). <sup>13</sup>C NMR (100 MHz, CDCl<sub>3</sub>) δ 164.5, 153.5, 150.8, 145.6, 137.1, 134.8, 133.3, 130.12, 130.07, 129.6, 129.13, 129.09, 129.0, 128.8, 127.6, 127.0, 120.2, 115.7, 35.3. HRMS (TOF MS Cl<sup>+</sup>) calculated for C<sub>23</sub>H<sub>17</sub>N<sub>2</sub>O<sup>+</sup> [M+H]<sup>+</sup>: 337.1341, found 337.1342.

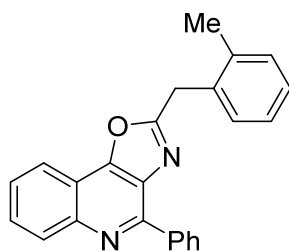

**2-(2-Methylbenzyl)-4-phenyloxazolo[4,5-*c*]quinoline (3D).** 40.6 mg, 58% yield. Yellow solid; mp: 120-122 °C. <sup>1</sup>H NMR (400 MHz, CDCl<sub>3</sub>) (δ, ppm) 8.78 (d, *J* = 7.6

Hz, 2H), 8.32 (d,  $J = 8.5$  Hz, 1H), 8.13 (d,  $J = 8.1$  Hz, 1H), 7.79 – 7.72 (m, 1H), 7.67 – 7.55 (comp, 4H), 7.41 – 7.39 (m, 1H), 7.30 – 7.25 (comp, 3H), 4.47 (s, 2H), 2.58 (s, 3H).  $^{13}\text{C}$  NMR (100 MHz,  $\text{CDCl}_3$ )  $\delta$  164.3, 153.3, 150.6, 145.6, 137.2, 136.9, 133.4, 133.2, 130.7, 130.1, 130.0, 129.9, 129.6, 129.0, 128.7, 127.8, 126.8, 126.5, 120.1, 115.7, 33.1, 19.9. HRMS (TOF MS  $\text{Cl}^+$ ) calculated for  $\text{C}_{24}\text{H}_{19}\text{N}_2\text{O}^+$   $[\text{M}+\text{H}]^+$ : 351.1497, found 351.1490.

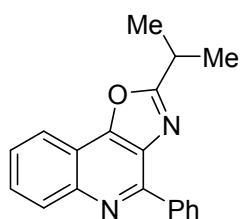

**2-Isopropyl-4-phenyloxazolo[4,5-c]quinoline (3E).** 49.6 mg, 86% yield. Yellow solid; mp: 88-90 °C.  $^1\text{H}$  NMR (400 MHz,  $\text{CDCl}_3$ ) ( $\delta$ , ppm) 8.78 – 8.75 (m, 2H), 8.29 (d,  $J = 8.5$  Hz, 1H), 8.18 – 8.16 (m, 1H), 7.75 – 7.70 (m, 1H), 7.67 – 7.56 (comp, 3H), 7.56 – 7.49 (m, 1H), 3.44 (hept,  $J = 7.0$  Hz, 1H), 1.58 (d,  $J = 7.0$  Hz, 6H).  $^{13}\text{C}$  NMR (100 MHz,  $\text{CDCl}_3$ )  $\delta$  170.6, 153.0, 150.6, 145.5, 137.3, 133.2, 130.2, 129.9, 129.6, 128.8, 128.7, 126.8, 120.1, 115.8, 29.2, 20.7. HRMS (TOF MS  $\text{Cl}^+$ ) calculated for  $\text{C}_{19}\text{H}_{17}\text{N}_2\text{O}^+$   $[\text{M}+\text{H}]^+$ : 289.1341, found 289.1350.

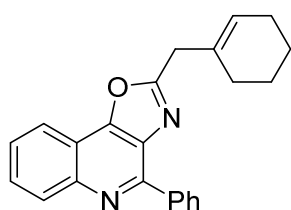

**2-(Cyclohex-1-en-1-ylmethyl)-4-phenyloxazolo[4,5-c]quinoline (3F).** 42.9 mg, 63% yield. Yellow oil.  $^1\text{H}$  NMR (400 MHz,  $\text{CDCl}_3$ ) ( $\delta$ , ppm) 8.72 – 8.69 (m, 2H), 8.30 (d,  $J = 8.5$  Hz, 1H), 8.20 – 8.17 (m, 1H), 7.76 – 7.71 (m, 1H), 7.64 – 7.56 (comp, 3H), 7.54 – 7.48 (m, 1H), 5.71 – 5.68 (m, 1H), 3.75 (d,  $J = 1.9$  Hz, 2H), 2.18 – 2.03 (m, 4H), 1.64 (comp, 4H).  $^{13}\text{C}$  NMR (100 MHz,  $\text{CDCl}_3$ )  $\delta$  164.8, 150.7, 145.5, 137.2, 133.3, 131.9, 130.1, 130.0, 129.6, 129.0, 128.7, 126.9, 125.9, 120.2, 115.8, 37.5, 28.5, 25.4, 22.8, 22.1. HRMS (TOF MS  $\text{Cl}^+$ ) calculated for  $\text{C}_{23}\text{H}_{21}\text{N}_2\text{O}^+$   $[\text{M}+\text{H}]^+$ : 341.1648,

found 341.1650.

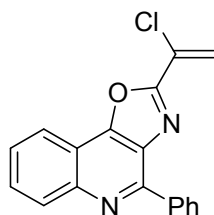

**2-(1-Chlorovinyl)-4-phenyloxazolo[4,5-c]quinoline (3G).** 39.8 mg, 65% yield. Yellow solid; mp: 130-132 °C.  $^1\text{H}$  NMR (400 MHz,  $\text{CDCl}_3$ ) ( $\delta$ , ppm) 8.76 – 8.73 (m, 2H), 8.28 – 8.25 (m, 1H), 8.18 – 8.14 (m, 1H), 7.76 – 7.72 (m, 1H), 7.63 – 7.56 (comp, 3H), 7.55 – 7.51 (m, 1H), 6.74 (d,  $J = 2.1$  Hz, 1H), 6.09 (d,  $J = 2.1$  Hz, 1H).  $^{13}\text{C}$  NMR (100 MHz,  $\text{CDCl}_3$ )  $\delta$  158.4, 153.2, 150.9, 146.1, 136.8, 133.5, 130.29, 130.26, 129.7, 129.6, 128.7, 127.2, 126.8, 122.1, 120.3, 115.4. HRMS (TOF MS  $\text{Cl}^+$ ) calculated for  $\text{C}_{18}\text{H}_{11}\text{ClN}_2\text{ONa}^+$   $[\text{M}+\text{Na}]^+$ : 329.0458, found 329.0443.

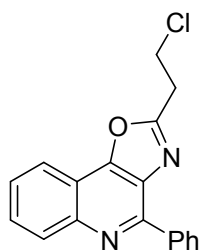

**2-(2-Chloroethyl)-4-phenyloxazolo[4,5-c]quinoline (3H).** 46.3 mg, 75% yield. Yellow solid; mp: 145-147 °C.  $^1\text{H}$  NMR (400 MHz,  $\text{CDCl}_3$ ) ( $\delta$ , ppm) 8.72 – 8.67 (m, 2H), 8.28 (d,  $J = 8.5$  Hz, 1H), 8.14 – 8.12 (m, 1H), 7.76 – 7.72 (m, 1H), 7.65 – 7.55 (comp, 3H), 7.55 – 7.48 (m, 1H), 4.09 (t,  $J = 7.0$  Hz, 2H), 3.56 (t,  $J = 7.0$  Hz, 2H).  $^{13}\text{C}$  NMR (100 MHz,  $\text{CDCl}_3$ )  $\delta$  162.5, 153.1, 150.6, 145.7, 137.1, 133.0, 130.2, 130.1, 129.5, 129.2, 128.7, 127.0, 120.1, 115.6, 40.2, 32.3. HRMS (TOF MS  $\text{Cl}^+$ ) calculated for  $\text{C}_{18}\text{H}_{14}\text{ClN}_2\text{O}^+$   $[\text{M}+\text{H}]^+$ : 309.0795, found 309.0799.

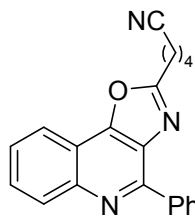

**5-(4-Phenyloxazolo[4,5-c]quinolin-2-yl)pentanenitrile (3I).** 43.2 mg, 66% yield. Yellow solid; mp: 101-103 °C.  $^1\text{H}$  NMR (400 MHz,  $\text{CDCl}_3$ ) ( $\delta$ , ppm) 8.72 – 8.66 (m, 2H), 8.27 (d,  $J$  = 8.5 Hz, 1H), 8.10 – 8.05 (m, 1H), 7.73 – 7.69 (m, 1H), 7.69 – 7.56 (comp, 3H), 7.52 – 7.49 (m, 1H), 3.07 (t,  $J$  = 7.4 Hz, 2H), 2.42 (t,  $J$  = 7.0 Hz, 2H), 2.12 – 2.06 (m, 2H), 1.88 – 1.78 (m, 2H).  $^{13}\text{C}$  NMR (100 MHz,  $\text{CDCl}_3$ )  $\delta$  165.2, 152.9, 150.3, 145.4, 137.0, 132.90, 132.87, 130.0, 129.4, 129.0, 128.6, 126.9, 120.0, 119.3, 115.5, 27.8, 25.7, 24.8, 17.0. HRMS (TOF MS  $\text{CI}^+$ ) calculated for  $\text{C}_{21}\text{H}_{18}\text{N}_3\text{O}^+$   $[\text{M}+\text{H}]^+$ : 328.1450, found 328.1443.

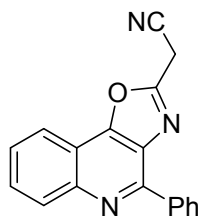

**2-(4-Phenyloxazolo[4,5-c]quinolin-2-yl)acetonitrile (3J).** 46.8 mg, 82% yield. Red solid; mp: 180-182 °C.  $^1\text{H}$  NMR (400 MHz,  $\text{CDCl}_3$ ) ( $\delta$ , ppm) 8.68 – 8.59 (m, 2H), 8.26 (d,  $J$  = 8.5 Hz, 1H), 8.10 (d,  $J$  = 8.1 Hz, 1H), 7.80 – 7.72 (m, 1H), 7.66 – 7.49 (comp, 4H), 4.21 (s, 2H).  $^{13}\text{C}$  NMR (100 MHz,  $\text{CDCl}_3$ )  $\delta$  154.4, 153.6, 150.5, 145.9, 136.5, 132.6, 130.4, 130.2, 129.8, 129.4, 128.8, 127.4, 120.1, 115.3, 112.9, 18.9. HRMS (TOF MS  $\text{CI}^+$ ) calculated for  $\text{C}_{18}\text{H}_{11}\text{N}_3\text{ONa}^+$   $[\text{M}+\text{H}]^+$ : 286.0980, found 286.0980.

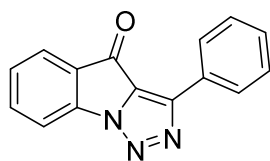

**3-Phenyl-4H-[1,2,3]triazolo[1,5-a]indol-4-one (4a).** Yellow solid; mp: 241-243 °C.

$^1\text{H}$  NMR (400 MHz,  $\text{CDCl}_3$ ) ( $\delta$ , ppm) 8.39 – 8.34 (m, 2H), 7.84 – 7.77 (m, 2H), 7.71 – 7.66 (m, 1H), 7.54 – 7.42 (comp, 4H).  $^{13}\text{C}$  NMR (100 MHz,  $\text{CDCl}_3$ )  $\delta$  176.0, 146.9, 140.6, 135.8, 130.9, 129.91, 129.87, 129.2, 128.9, 128.4, 127.8, 126.1, 113.1. HRMS (TOF MS  $\text{Cl}^+$ ) calculated for  $\text{C}_{15}\text{H}_{10}\text{N}_3\text{O}^+$   $[\text{M}+\text{H}]^+$ : 248.0818, found 248.0823.

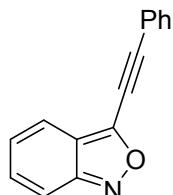

**3-(Phenylethynyl)benzo[c]isoxazole (5a).** Yellow solid; mp: 68-70 °C.  $^1\text{H}$  NMR (400 MHz,  $\text{CDCl}_3$ ) ( $\delta$ , ppm) 7.67 – 7.62 (comp, 4H), 7.47 – 7.39 (comp, 3H), 7.36 – 7.30 (m, 1H), 7.12 – 7.06 (m, 1H).  $^{13}\text{C}$  NMR (100 MHz,  $\text{CDCl}_3$ )  $\delta$  157.2, 149.4, 132.0, 131.2, 130.2, 128.8, 125.3, 121.1, 120.4, 119.9, 115.8, 103.6, 75.9. HRMS (TOF MS  $\text{Cl}^+$ ) calculated for  $\text{C}_{15}\text{H}_{10}\text{NO}^+$   $[\text{M}+\text{H}]^+$ : 220.0757, found 220.0762.

## Reactions of Aldehydes with Azide Alkynes

To a 10-mL oven-dried vial containing a magnetic stirring bar, azide alkynes **1** (0.20 mmol),  $\text{AuCl}_3$  (2.3 mg, 5.0 mol %), and aldehydes **6** (0.24 mmol) were added in sequence at room temperature under argon atmosphere. The resulting reaction mixture was stirred for 4 h under these conditions. When the reaction was completed (monitored by TLC). Then the solvent was evaporated *in vacuo* and the residue was purified by flash column chromatography on silica gel without additional treatment (hexanes/ethyl acetate = 80:1 to 20:1) to afford the pure products **7** in good yields.

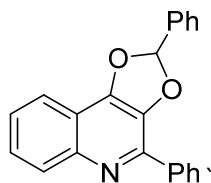

**2,4-Diphenyl-[1,3]dioxolo[4,5-c]quinoline (7a).** 40.3 mg, 62% yield. Yellow solid; mp: 156 -158 °C.  $^1\text{H}$  NMR (400 MHz,  $\text{CDCl}_3$ ) ( $\delta$ , ppm) 8.41 (d,  $J = 7.3$  Hz, 2H), 8.14 (d,  $J = 8.6$  Hz, 1H), 7.87 – 7.85 (d,  $J = 8.3$  Hz, 1H), 7.71 – 7.68 (m, 2H), 7.64 – 7.57 (m, 1H), 7.55 – 7.45 (comp, 7H), 7.35 (s, 1H).  $^{13}\text{C}$  NMR (100 MHz,  $\text{CDCl}_3$ )  $\delta$  149.8, 145.8, 142.1, 139.2, 136.2, 135.7, 130.9, 129.8, 129.7, 129.0, 128.7, 128.5, 128.3, 126.8, 126.2, 120.2, 115.7, 112.5. HRMS (TOF MS  $\text{Cl}^+$ ) calculated for  $\text{C}_{22}\text{H}_{16}\text{NO}_2^+$   $[\text{M}+\text{H}]^+$ : 326.1181, found 326.1187.

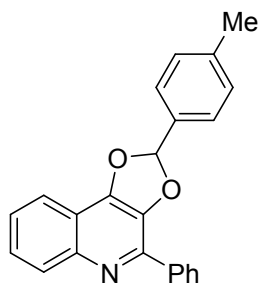

**4-Phenyl-2-(*p*-tolyl)-[1,3]dioxolo[4,5-c]quinoline (7b).** 35.2 mg, 52% yield. Yellow solid; mp: 215-217 °C.  $^1\text{H}$  NMR (400 MHz,  $\text{CDCl}_3$ ) ( $\delta$ , ppm) 8.44 – 8.38 (m, 2H), 8.14 (d,  $J = 8.7$  Hz, 1H), 7.87 – 7.84 (m, 1H), 7.63 – 7.55 (comp, 3H), 7.55 – 7.50 (m, 2H), 7.50 – 7.43 (m, 2H), 7.34 – 7.28 (comp, 3H), 2.42 (s, 3H).  $^{13}\text{C}$  NMR (100 MHz,  $\text{CDCl}_3$ )  $\delta$  149.9, 145.8, 142.1, 141.1, 139.3, 136.3, 132.8, 129.8, 129.6, 128.7, 128.5, 128.2, 126.8, 126.1, 120.2, 115.7, 112.7, 21.6. HRMS (TOF MS  $\text{Cl}^+$ ) calculated for  $\text{C}_{23}\text{H}_{18}\text{NO}_2^+$   $[\text{M}+\text{H}]^+$ : 340.1332, found 340.1338.



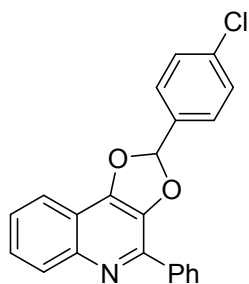

**2-(4-Chlorophenyl)-4-phenyl-[1,3]dioxolo[4,5-*c*]quinoline (7c).** 42.5 mg, 59% yield. Yellow solid; mp: 212-214 °C. <sup>1</sup>H NMR (400 MHz, CDCl<sub>3</sub>) (δ, ppm) 8.42 – 8.35 (m, 2H), 8.15 (d, *J* = 8.6 Hz, 1H), 7.85 – 7.83 (m, 1H), 7.63 – 7.59 (comp, 3H), 7.55 – 7.43 (comp, 6H), 7.32 (s, 1H). <sup>13</sup>C NMR (100 MHz, CDCl<sub>3</sub>) δ 149.7, 145.8, 139.0, 136.9, 136.0, 134.2, 129.80, 129.76, 129.3, 128.8, 128.5, 128.1, 126.3, 120.1, 115.6, 111.7. HRMS (TOF MS Cl<sup>+</sup>) calculated for C<sub>22</sub>H<sub>15</sub>ClNO<sub>2</sub><sup>+</sup> [M+H]<sup>+</sup>: 360.0791, found 360.0801.

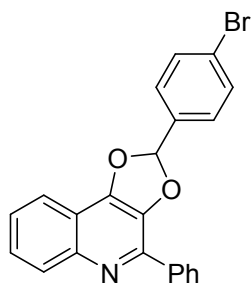

**2-(4-Bromophenyl)-4-phenyl-[1,3]dioxolo[4,5-*c*]quinoline (7d).** 50.1 mg, 62% yield. Yellow solid; mp: 135-137 °C. <sup>1</sup>H NMR (400 MHz, CDCl<sub>3</sub>) (δ, ppm) 8.41 – 8.36 (m, 2H), 8.13 (m, 1H), 7.84 (m, 1H), 7.64 – 7.58 (comp, 3H), 7.57 – 7.50 (comp, 4H), 7.49 – 7.44 (m, 2H), 7.29 (s, 1H). <sup>13</sup>C NMR (100 MHz, CDCl<sub>3</sub>) δ 149.5, 145.9, 142.1, 139.0, 136.1, 134.7, 132.2, 129.9, 129.7, 128.7, 128.41, 128.36, 126.3, 125.2, 120.1, 115.6, 111.6. HRMS (TOF MS Cl<sup>+</sup>) calculated for C<sub>22</sub>H<sub>15</sub>BrNO<sub>2</sub><sup>+</sup> [M+H]<sup>+</sup>: 404.0281, found 404.0285.

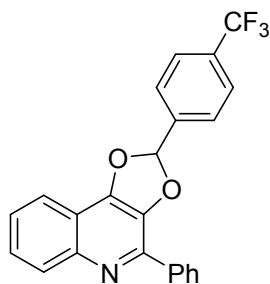

**4-Phenyl-2-[4-(trifluoromethyl)phenyl]-[1,3]dioxolo[4,5-*c*]quinoline (7e).** 31.3 mg, 40% yield. Yellow liquid.  $^1\text{H}$  NMR (400 MHz,  $\text{CDCl}_3$ ) ( $\delta$ , ppm) 8.41 – 8.36 (m, 2H), 8.15 (d,  $J = 8.7$  Hz, 1H), 7.89 – 7.79 (comp, 3H), 7.75 (d,  $J = 8.2$  Hz, 2H), 7.62 (m, 1H), 7.51 (comp, 4H), 7.39 (s, 1H).  $^{13}\text{C}$  NMR (100 MHz,  $\text{CDCl}_3$ )  $\delta$  149.5, 145.9, 142.2, 139.4, 138.9, 136.0, 132.9 (d,  $J = 32.7$  Hz), 129.9, 129.8, 128.9, 128.54, 128.45, 127.2, 126.4, 126.0 (q,  $J = 3.8$  Hz), 123.84 (d,  $J = 272.5$  Hz), 120.0, 115.6, 111.2.  $^{19}\text{F}$  NMR (376 MHz,  $\text{CDCl}_3$ )  $\delta$  -62.9. HRMS (TOF MS  $\text{Cl}^+$ ) calculated for  $\text{C}_{23}\text{H}_{15}\text{F}_3\text{NO}_2^+$   $[\text{M}+\text{H}]^+$ : 394.1055, found 394.1047.

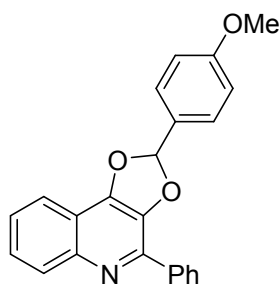

**2-(4-Methoxyphenyl)-4-phenyl-[1,3]dioxolo[4,5-*c*]quinoline (7f).** 48.3 mg, 68% yield. Yellow solid; mp: 227-229 °C.  $^1\text{H}$  NMR (400 MHz,  $\text{CDCl}_3$ ) ( $\delta$ , ppm) 8.42 – 8.36 (m, 2H), 8.12 (d,  $J = 8.6$  Hz, 1H), 7.85 – 7.83 (m, 1H), 7.64 – 7.57 (comp, 3H), 7.51 (t,  $J = 7.3$  Hz, 2H), 7.48 – 7.41 (m, 2H), 7.30 (s, 1H), 7.02 – 6.97 (m, 2H), 3.85 (s, 3H).  $^{13}\text{C}$  NMR (100 MHz,  $\text{CDCl}_3$ )  $\delta$  161.7, 149.9, 145.8, 142.0, 139.3, 136.3, 129.7, 128.7, 128.5, 128.4, 128.2, 127.8, 126.1, 120.2, 115.7, 114.4, 112.7, 55.5. HRMS (TOF MS  $\text{Cl}^+$ ) calculated for  $\text{C}_{23}\text{H}_{18}\text{NO}_3^+$   $[\text{M}+\text{H}]^+$ : 356.1281, found 356.1288.

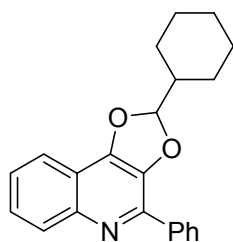

**2-Cyclohexyl-4-phenyl-[1,3]dioxolo[4,5-*c*]quinoline (7g).** 39.8 mg, 60% yield. Yellow solid; mp: 103-105 °C. <sup>1</sup>H NMR (400 MHz, CDCl<sub>3</sub>) (δ, ppm) 8.40 – 8.34 (m, 2H), 8.09 (d, *J* = 8.6 Hz, 1H), 7.81 – 7.84 (m, 1H), 7.60 – 7.50 (comp, 3H), 7.49 – 7.40 (m, 2H), 6.28 (d, *J* = 4.6 Hz, 1H), 2.11 – 1.95 (m, 3H), 1.88 – 1.81 (m, 2H), 1.74 (d, *J* = 10.3 Hz, 1H), 1.35 – 1.26 (comp, 5H). <sup>13</sup>C NMR (100 MHz, CDCl<sub>3</sub>) δ 150.2, 145.5, 141.8, 139.5, 136.4, 129.8, 129.5, 128.7, 128.4, 128.0, 125.9, 120.1, 117.1, 115.6, 42.7, 26.34, 26.27, 25.53, 25.51. HRMS (TOF MS CI<sup>+</sup>) calculated for C<sub>22</sub>H<sub>22</sub>NO<sub>2</sub><sup>+</sup> [M+H]<sup>+</sup>: 332.1651, found 332.1649.

## General Procedure for the Scale Up.

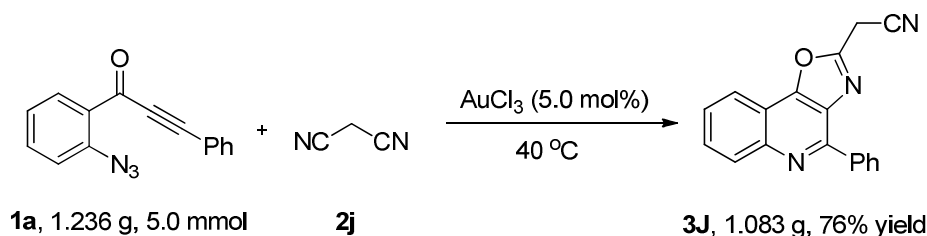

To a 50-mL oven-dried round-bottom flask with a magnetic stirring bar, **1a** (1.236 g, 5.0 mmol), AuCl<sub>3</sub> (58.1 mg, 5.0 mol %), and malononitrile **2j** (20.0 mL) were added in sequence under atmosphere of argon at 40 °C, and the reaction mixture was stirred for 12 h under these conditions. When the reaction was completed (monitored by TLC), H<sub>2</sub>O (5.0 mL) was added to quench the reaction, and the aqueous layer was extracted with DCM (2 × 10 mL), the combined organic layer was washed with brine (20 mL) and dried over anhydrous Na<sub>2</sub>SO<sub>4</sub>. Then the solvent was evaporated in vacuo after filtration, and the residue was purified by flash column chromatography on silica gel (hexanes/ethyl acetate = 15:1 to 5:1) to give 1.083 g of pure **3J** (76% yield).

## Control Experiment.

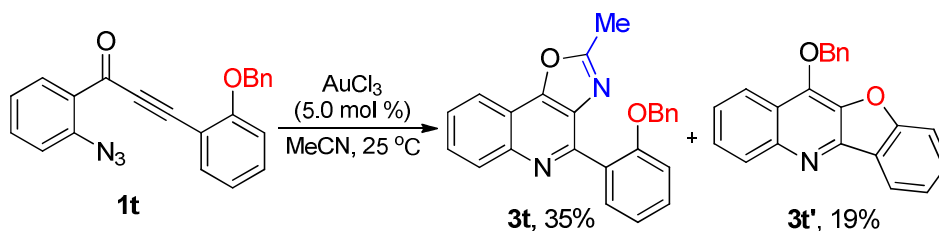

To a 10-mL oven-dried vial containing a magnetic stirring bar, **1t** (0.2 mmol), AuCl<sub>3</sub> (2.3 mg, 5.0 mol %), and acetonitrile (1.0 mL) were added in sequence under atmosphere of argon at 25 °C, and the reaction mixture was stirred for 12 h under these conditions. When the reaction was completed (monitored by TLC), the solvent was evaporated *in vacuo* and the residue was purified by flash column chromatography on silica gel (hexanes/ethyl acetate = 40:1 to 15:1) to give pure products **3t** and **3t'**.

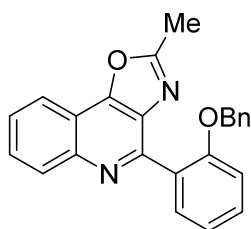

**4-[2-(Benzyloxy)phenyl]-2-methyloxazolo[4,5-*c*]quinoline (**3t**)**. 25.6 mg, 35% yield. Yellow solid; mp: 128-130 °C. <sup>1</sup>H NMR (400 MHz, CDCl<sub>3</sub>) (δ, ppm) 8.35 (d, *J* = 8.5 Hz, 1H), 8.18 (m, 1H), 7.74 (m, 1H), 7.70 (m, 1H), 7.65 (m, 1H), 7.45 (m, 1H), 7.30 – 7.25 (m, 2H), 7.24 – 7.11 (comp, 5H), 5.16 (s, 2H), 2.70 (s, 3H). <sup>13</sup>C NMR (100 MHz, CDCl<sub>3</sub>) δ 163.1, 156.9, 152.2, 151.6, 145.6, 137.4, 134.8, 131.5, 131.0, 130.0, 128.9, 128.8, 128.3, 127.5, 127.0, 127.0, 121.5, 120.1, 115.9, 113.4, 70.6, 14.5. HRMS (TOF MS Cl<sup>+</sup>) calculated for C<sub>24</sub>H<sub>18</sub>N<sub>2</sub>O<sub>2</sub><sup>+</sup> [M+H]<sup>+</sup>: 366.1447, found 366.1444.

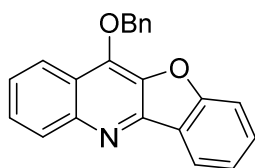

**11-(Benzyloxy)benzofuro[3,2-*b*]quinoline (**3t'**)**. 12.4 mg, 19% yield. Yellow solid;

mp: 154-156 °C.  $^1\text{H}$  NMR (400 MHz,  $\text{CDCl}_3$ ) ( $\delta$ , ppm) 8.38 (d,  $J$  = 8.3 Hz, 2H), 8.21 (d,  $J$  = 8.5 Hz, 1H), 7.74 – 7.67 (m, 1H), 7.66 – 7.58 (comp, 4H), 7.54 – 7.34 (comp, 5H), 6.00 (d,  $J$  = 1.2 Hz, 2H).  $^{13}\text{C}$  NMR (100 MHz,  $\text{CDCl}_3$ )  $\delta$  158.8, 149.2, 147.5, 143.8, 136.8, 134.7, 130.8, 128.8, 128.7, 128.6, 128.6, 128.0, 125.1, 123.7, 123.2, 122.6, 122.4, 121.5, 112.1, 74.4. HRMS (TOF MS  $\text{Cl}^+$ ) calculated for  $\text{C}_{22}\text{H}_{16}\text{NO}_2^+$   $[\text{M}+\text{H}]^+$ : 326.1181, found 326.1174.

### Derivatizations:

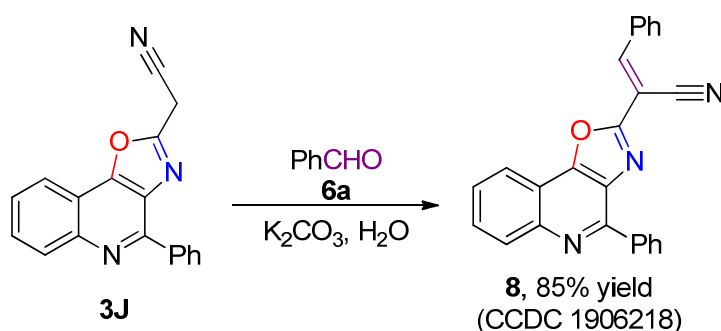

**Synthesis of 8:**<sup>2</sup> To a 10-mL oven-dried vial with a magnetic stirring bar, **3J** (28.5 mg, 0.1 mmol), **6a** (10.6 mg, 1.0 equiv.),  $\text{K}_2\text{CO}_3$  (13.8 mg, 5.0 equiv.) and  $\text{H}_2\text{O}$  (1.0 mL) were added in sequence, and the reaction mixture was stirred at room temperature for 10 mins during which time the yellow crystals appeared. The crystalline product was filtered, washed with ethanol, dried and recrystallization in DCM and hexane. The solid product filtrated and dried under vacuum to give the pure product **8** in 85% yield as red solid, mp = 188-190 °C;  $^1\text{H}$  NMR (400 MHz,  $\text{CDCl}_3$ ) ( $\delta$ , ppm) 8.80 – 8.74 (m, 2H), 8.41 (s, 1H), 8.27 (d,  $J$  = 8.5 Hz, 1H), 8.22 (m, 1H), 8.13 – 8.07 (m, 2H), 7.76 (m, 1H), 7.65 (t,  $J$  = 7.5 Hz, 1H), 7.59 (comp, 5H), 7.55 – 7.50 (m, 1H).  $^{13}\text{C}$  NMR (100 MHz,  $\text{CDCl}_3$ )  $\delta$  158.3, 153.0, 150.6, 149.6, 146.1, 136.8, 133.6, 133.1, 132.2, 130.8, 130.4, 130.3, 129.8, 129.6, 129.5, 128.8, 127.4, 120.4, 115.3, 114.8, 99.1. HRMS (TOF MS  $\text{ESI}^+$ ) calculated for  $\text{C}_{24}\text{H}_{16}\text{N}_3\text{O}^+$   $[\text{M}+\text{H}]^+$ : 374.1288, found 374.1290.

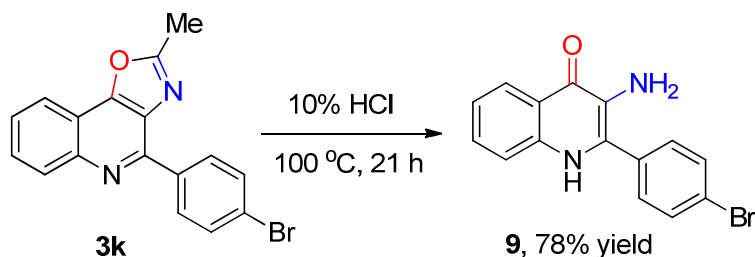

**Synthesis of 9:**<sup>3</sup> To a 10-mL oven-dried round-bottom flask with a magnetic stirring bar, **3k** (33.9 mg, 0.1 mmol), MeOH (1.0 mL), and 10% HCl aqueous solution (1.0 mL) were added in sequence, and the resulting reaction mixture was stirred at 100 °C for 21 h. Then the reaction mixture was diluted with CH<sub>2</sub>Cl<sub>2</sub> (10.0 mL), followed by addition of saturated NaHCO<sub>3</sub> aqueous solution (10.0 mL) slowly. The aqueous layer was extracted with CH<sub>2</sub>Cl<sub>2</sub> (3 × 10.0 mL), the combined organic layer was washed with brine and dried over anhydrous Na<sub>2</sub>SO<sub>4</sub>. The solvent was evaporated in *vacuo* after filtration, and the residue was purified by recrystallization in DCM and hexane to give 24.6 mg pure product **9** in 78% yield as yellow solid, mp = 127-129 °C; <sup>1</sup>H NMR (400 MHz, DMSO-*d*<sub>6</sub>) (δ, ppm) 11.44 (s, 1H), 8.11 (d, *J* = 8.1 Hz, 1H), 7.79 (d, *J* = 8.2 Hz, 2H), 7.68 (d, *J* = 8.1 Hz, 2H), 7.60 (d, *J* = 8.5 Hz, 1H), 7.55 – 7.48 (m, 1H), 7.20 (t, *J* = 7.5 Hz, 1H), 4.37 (s, 2H). <sup>13</sup>C NMR (100 MHz, DMSO-*d*<sub>6</sub>) δ 170.3, 138.2, 133.4, 132.3, 131.5, 130.4, 128.9, 128.6, 125.1, 122.9, 121.9, 121.0, 118.6. HRMS (TOF MS CI<sup>+</sup>) calculated for C<sub>15</sub>H<sub>12</sub>BrN<sub>2</sub>O [M+H]<sup>+</sup>: 315.0128, found 315.0125.

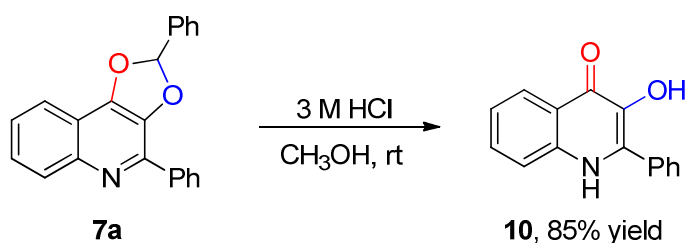

**Synthesis of 10:** To a 10-mL oven-dried vial with a magnetic stirring bar, **7a** (32.5 mg, 0.1 mmol), CH<sub>3</sub>OH (1.0 mL), and 3 M HCl (0.5 mL) were added in sequence, and the reaction mixture was stirred at room temperature for 2 h. Then the reaction

mixture was diluted with CH<sub>2</sub>Cl<sub>2</sub> (10.0 mL), followed by addition of saturated NaHCO<sub>3</sub> aqueous solution (10.0 mL) slowly. The aqueous layer was extracted with CH<sub>2</sub>Cl<sub>2</sub> (3 × 10.0 mL), the combined organic layer was washed with brine and dried over anhydrous Na<sub>2</sub>SO<sub>4</sub>. The solvent was evaporated in vacuo after filtration, and the residue was purified by recrystallization in DCM and hexane to give 20.1 mg pure product **10** in 85% yield as yellow solid, mp = 273-275 °C; <sup>1</sup>H NMR (400 MHz, DMSO-*d*<sub>6</sub>) (δ, ppm) 11.58 (s, 1H), 8.16 (d, *J* = 8.0 Hz, 1H), 7.87 – 7.70 (comp, 3H), 7.61 – 7.49 (comp, 5H), 7.27 (t, *J* = 7.4 Hz, 1H). <sup>13</sup>C NMR (100 MHz, DMSO-*d*<sub>6</sub>) δ 170.0, 138.0, 137.9, 132.4, 131.5, 130.5, 129.3, 129.2, 128.3, 124.5, 121.9, 121.8, 118.5. HRMS (TOF MS ESI<sup>+</sup>) calculated for C<sub>15</sub>H<sub>12</sub>NO<sub>2</sub><sup>+</sup> [M+H]<sup>+</sup>: 238.0863, found 238.0865.

## References:

- 1 Y. Jeong, B. Kim, J. K. Lee and J.-S. Ryu, *J. Org. Chem.*, 2014, **79**, 6444.
- 2 C. Youssef, H. B. Ammar, M. Belhouchet, K. Beydoun, R. B. Salem, H. Doucet and P. H. Dixneuf, *J. Heterocyclic Chem.*, 2011, **48**, 1126.
- 3 Y. Nakao, N. Kashiara, K. S. Kanyiva and T. Hiyama, *Angew. Chem. Int. Ed.*, 2010, **49**, 4451.

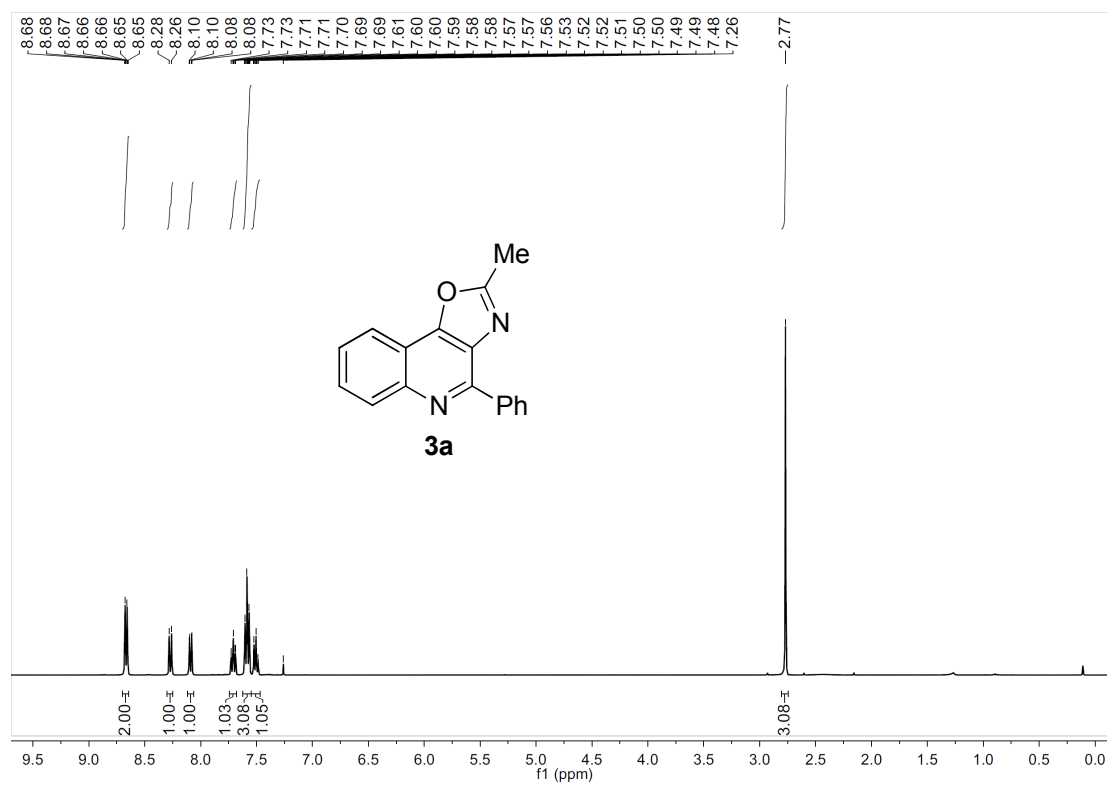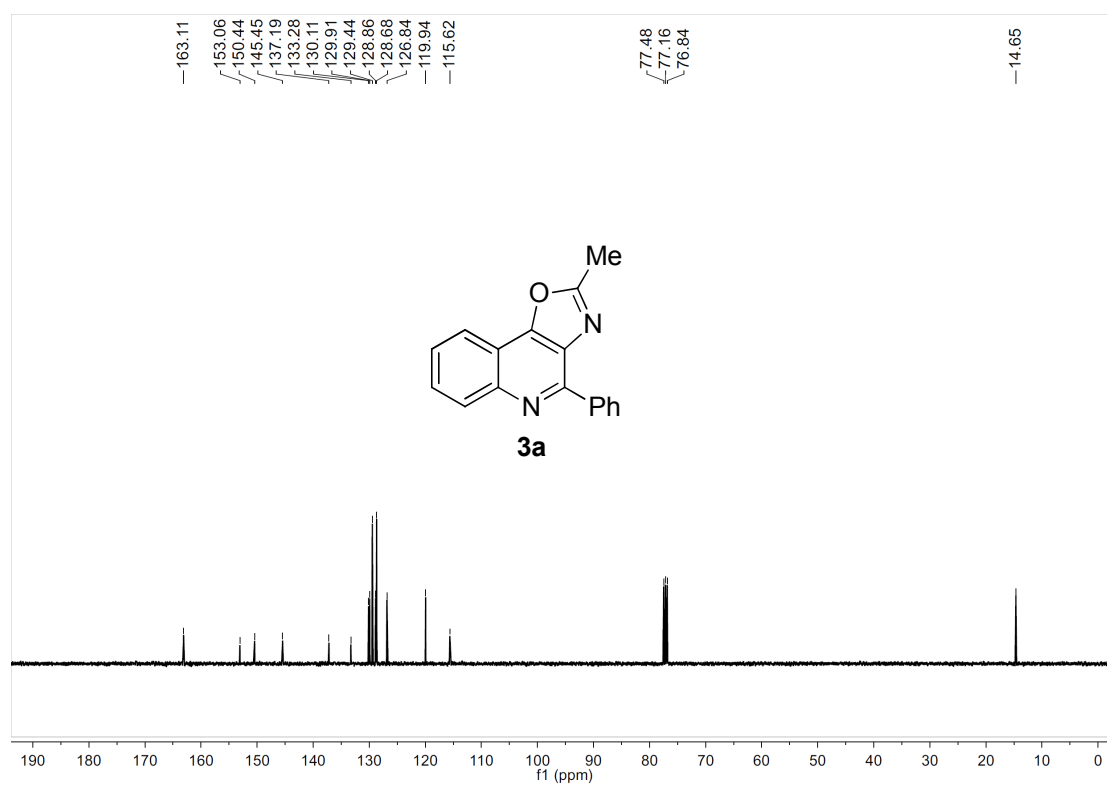



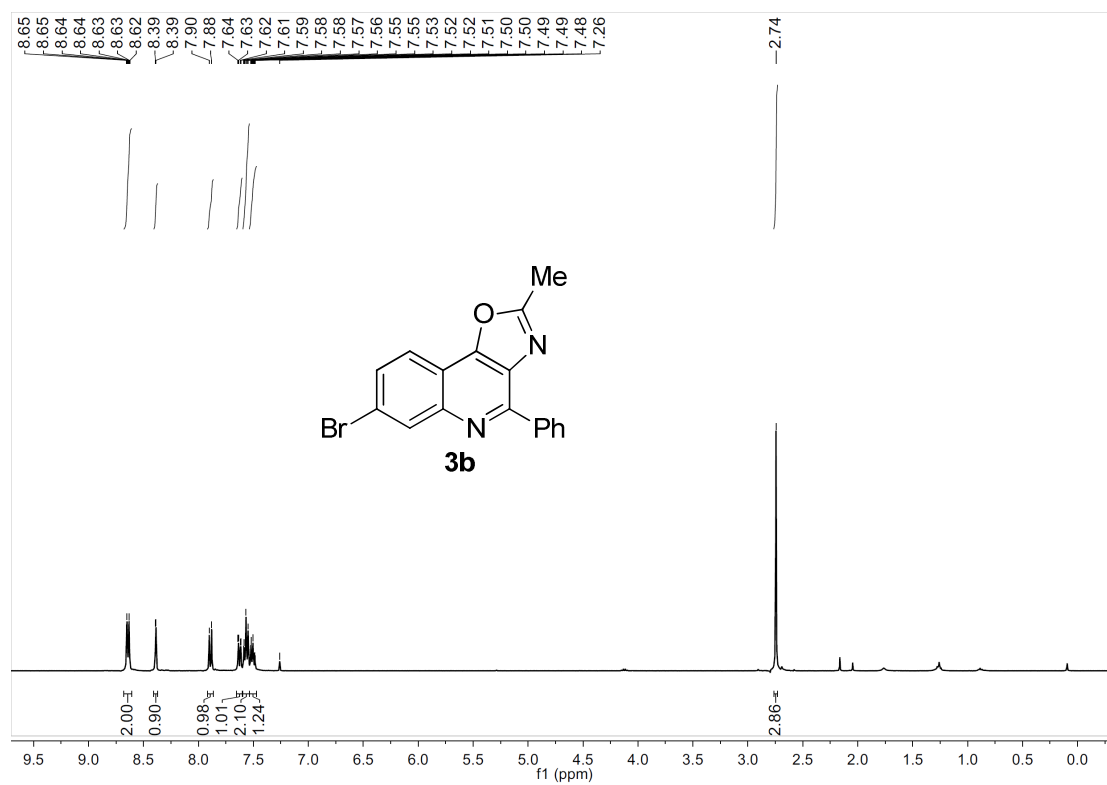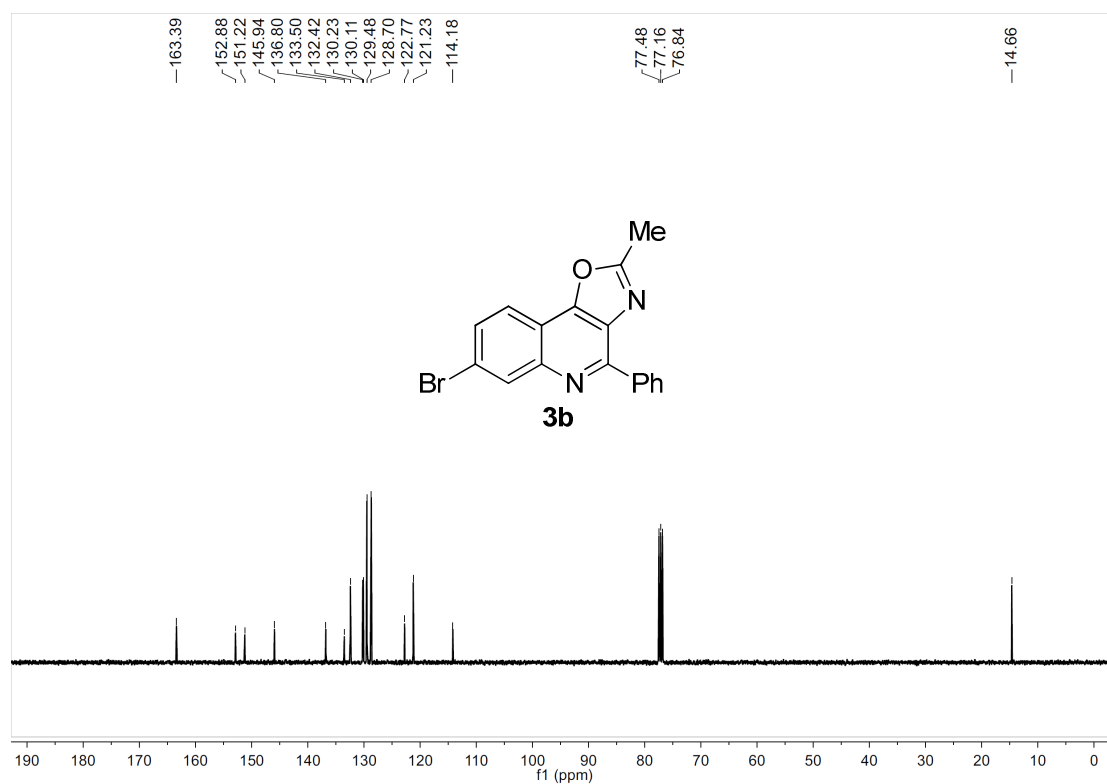

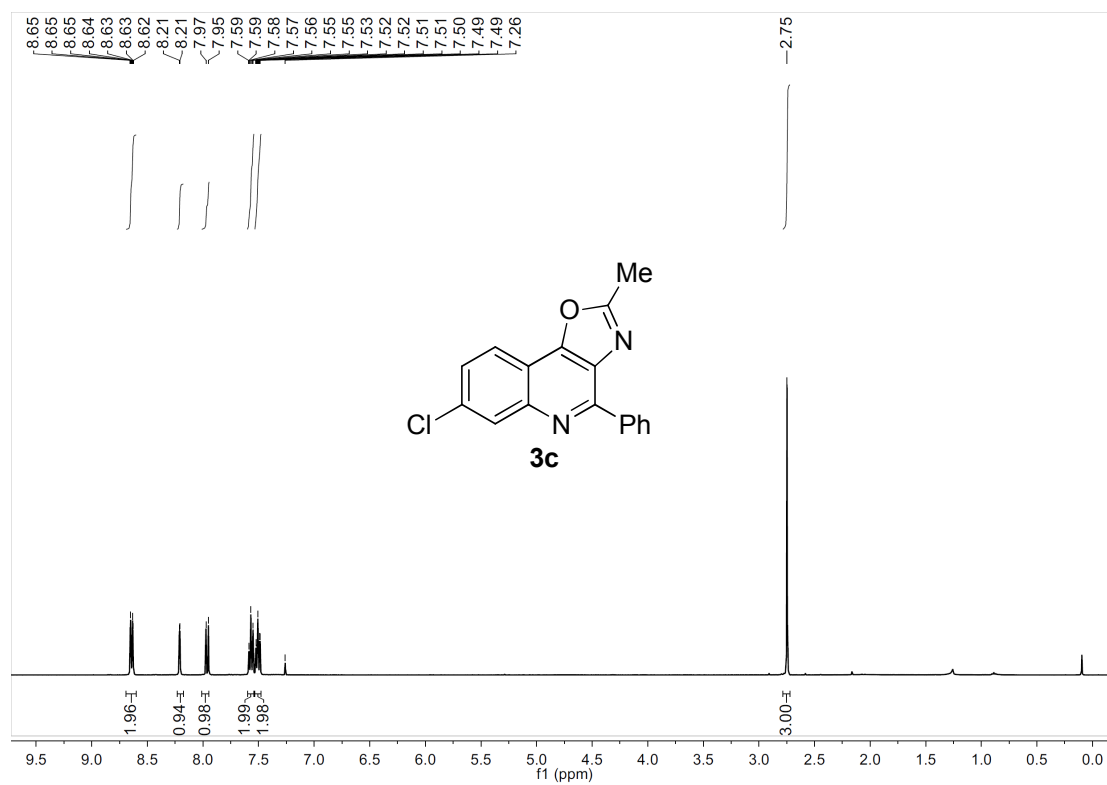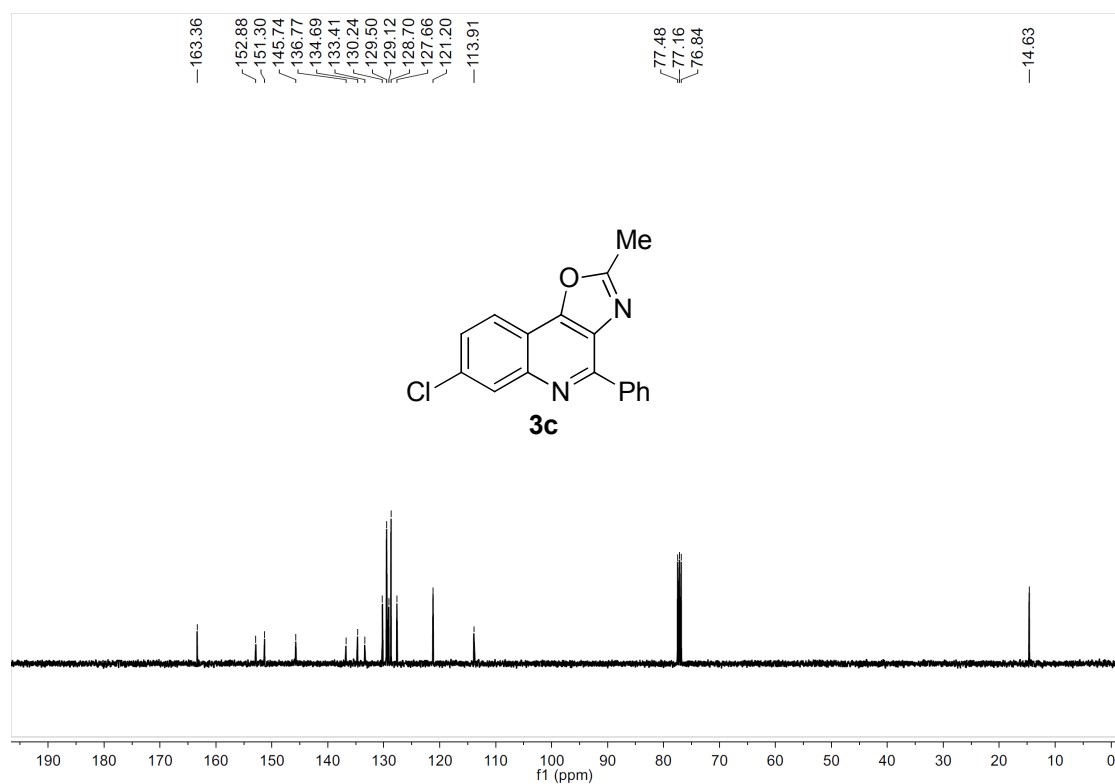

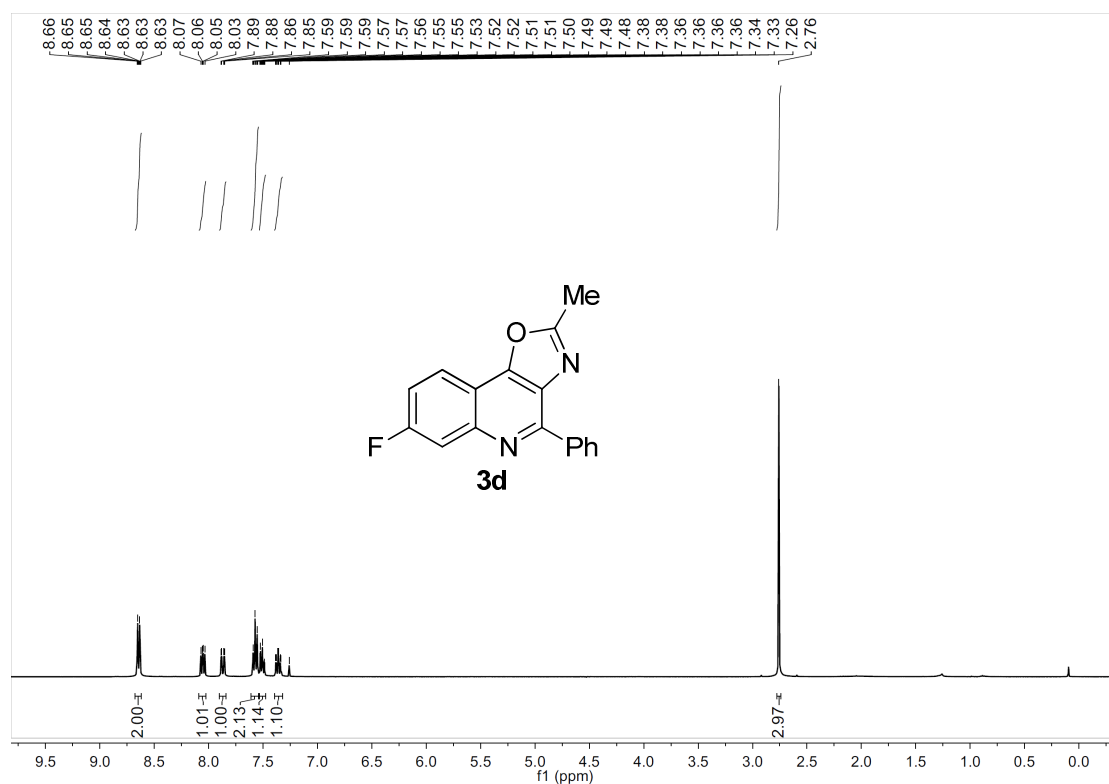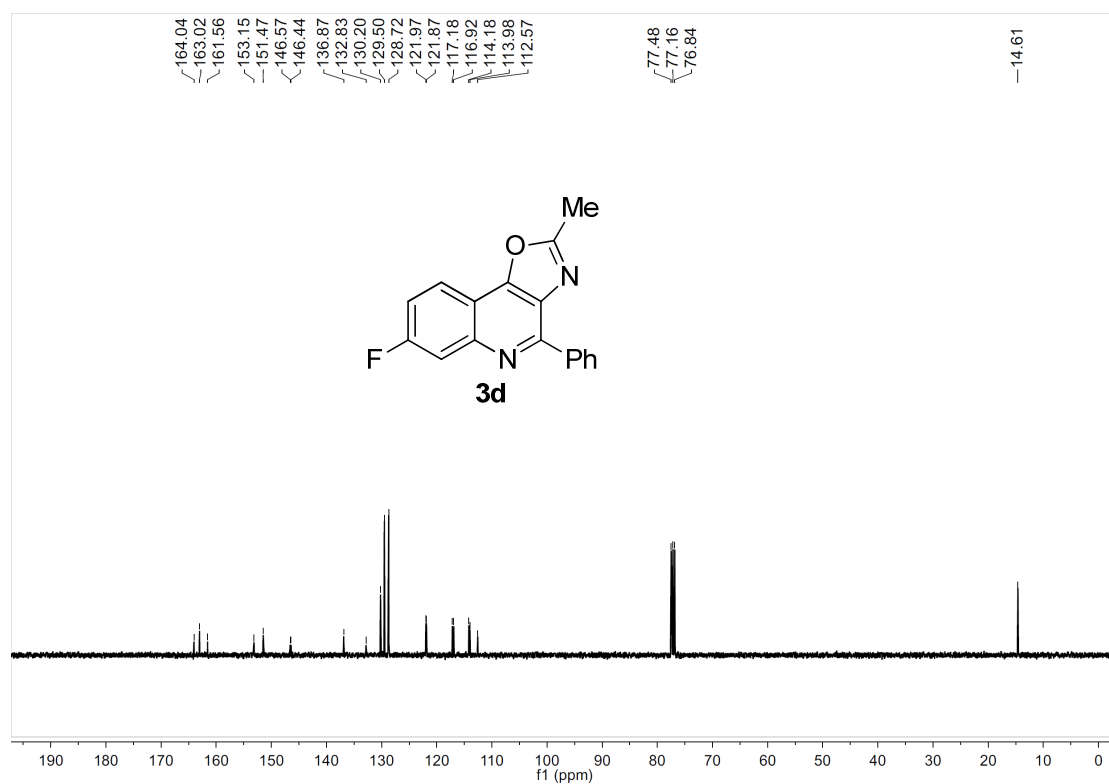

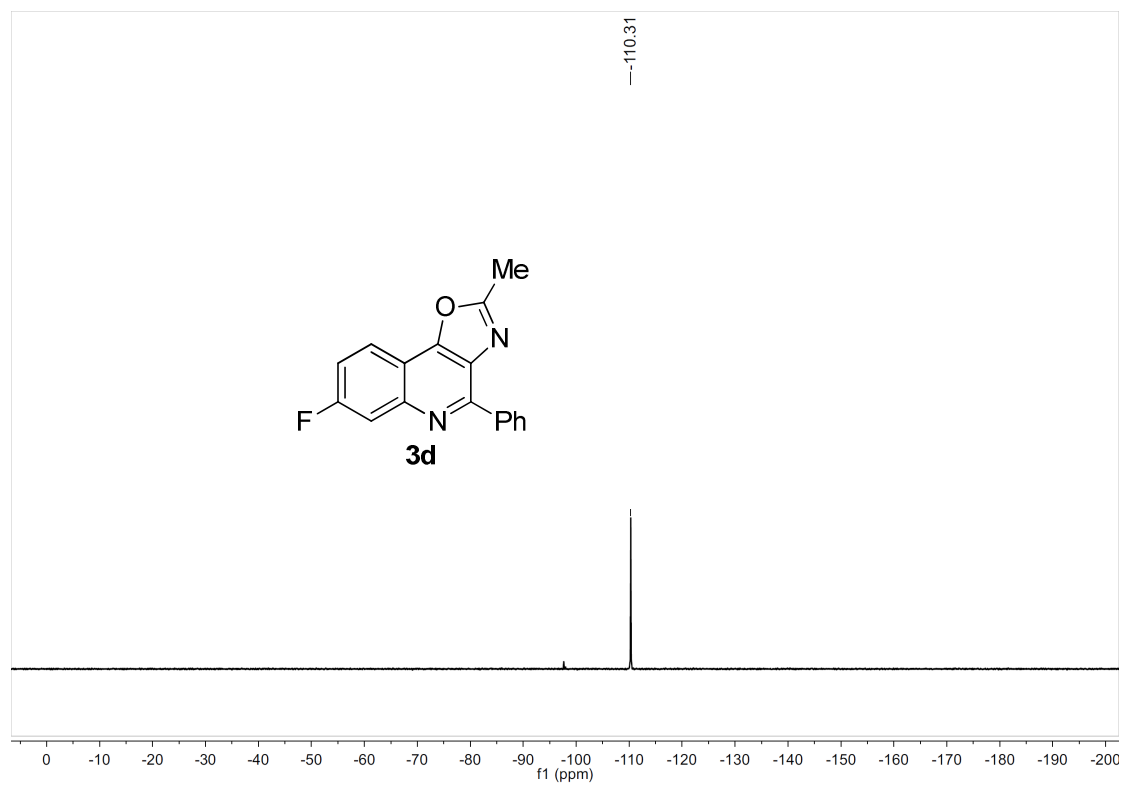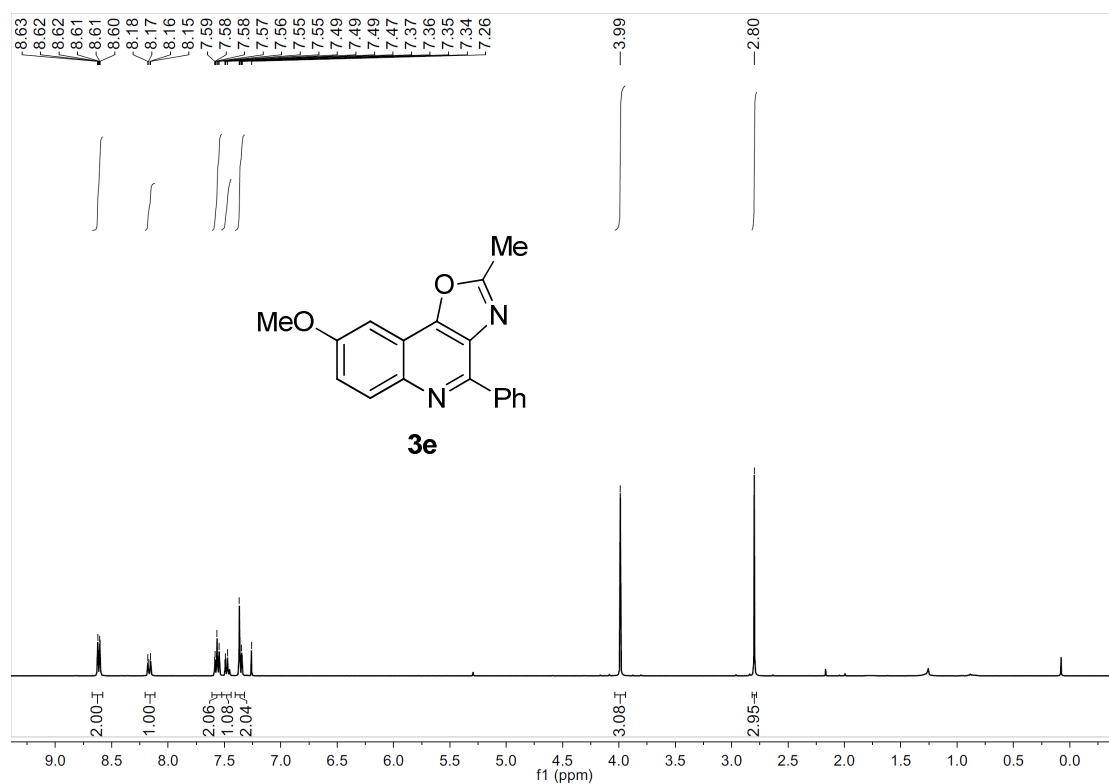

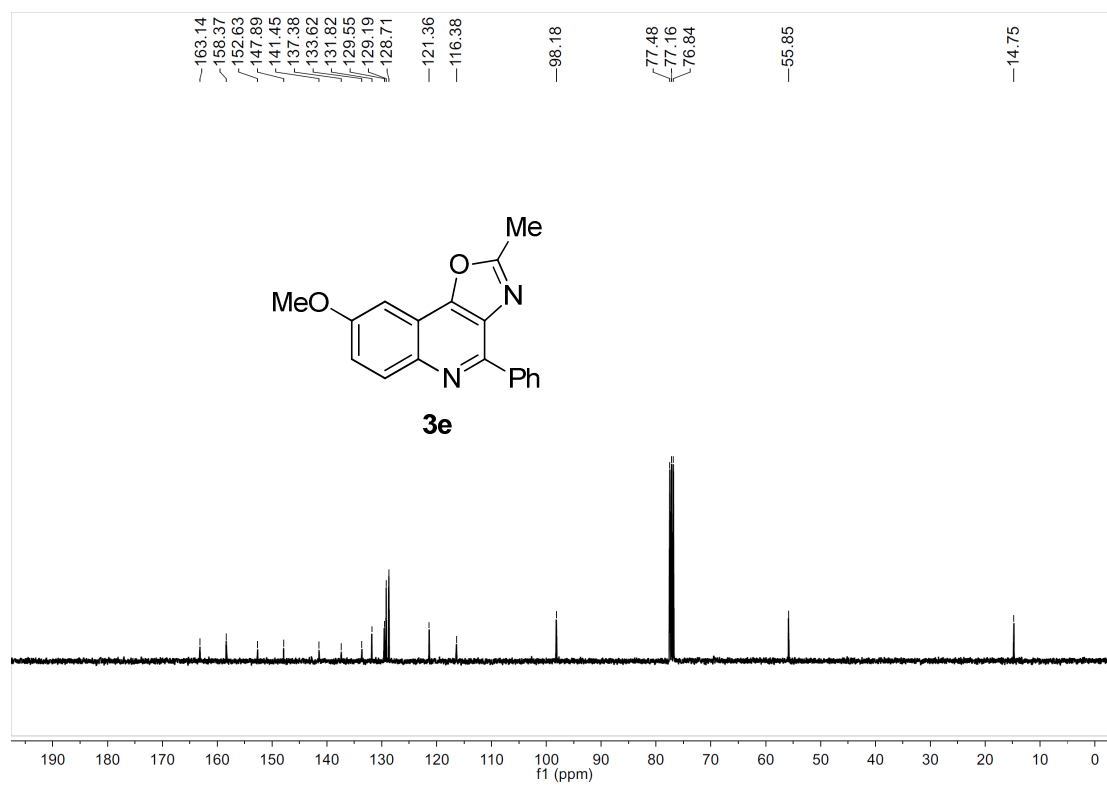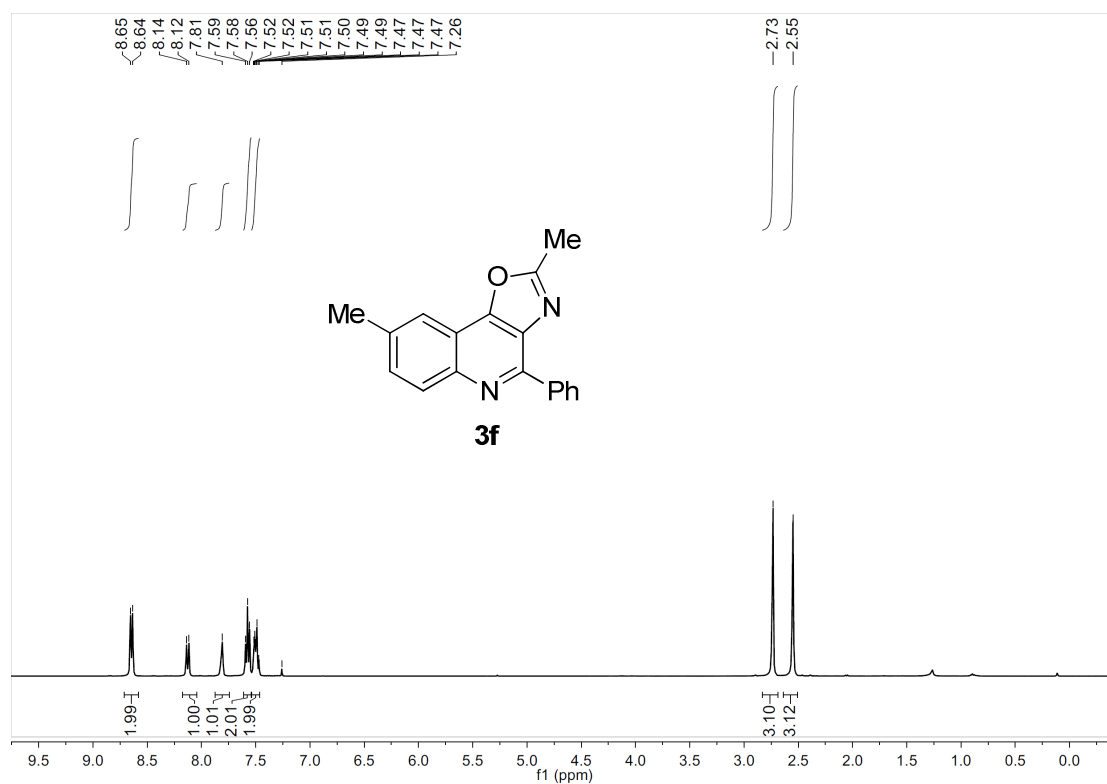

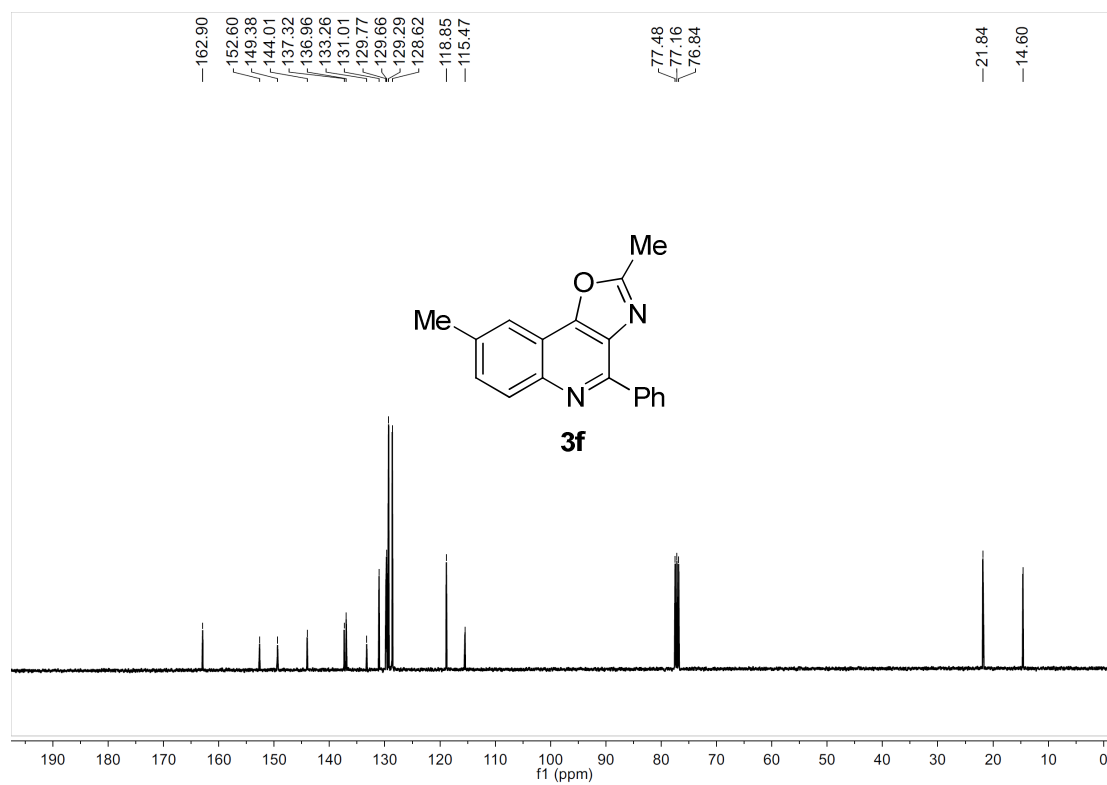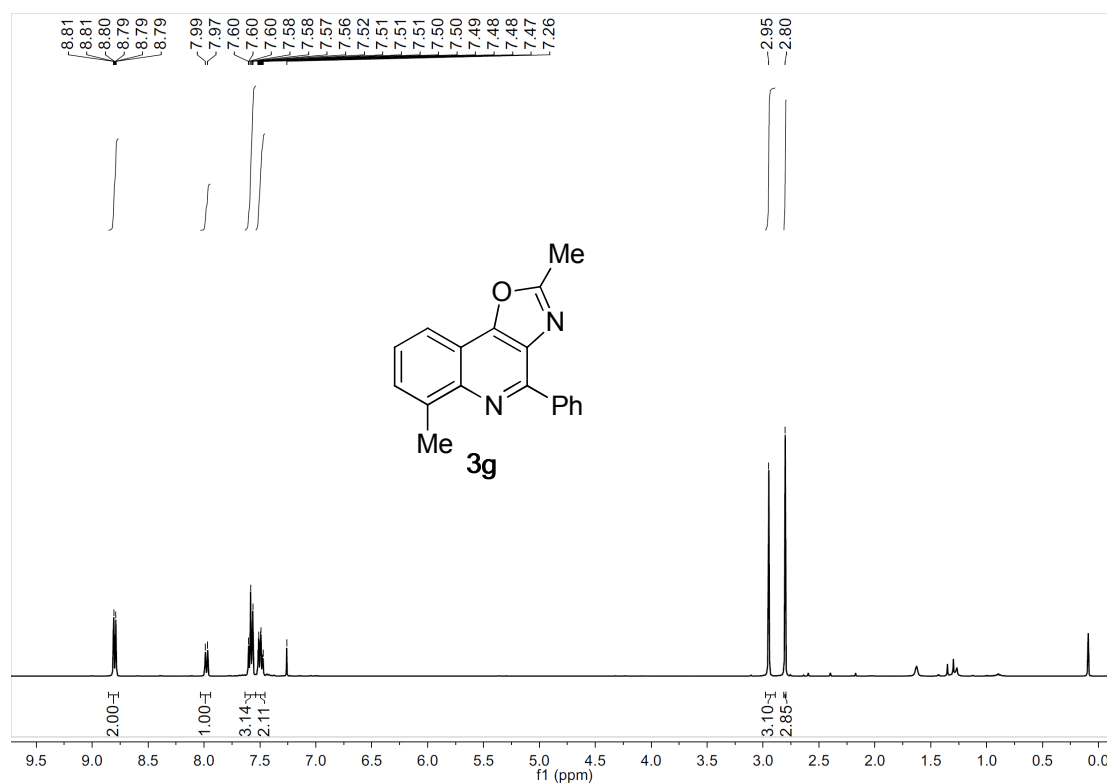

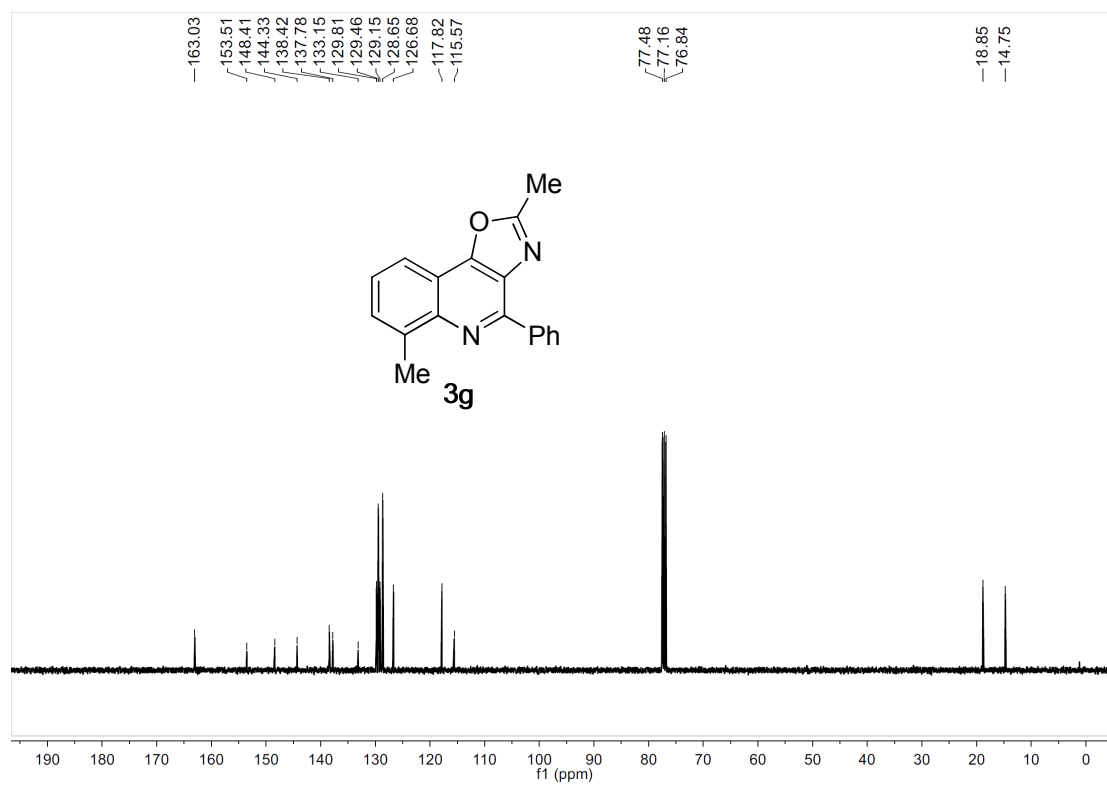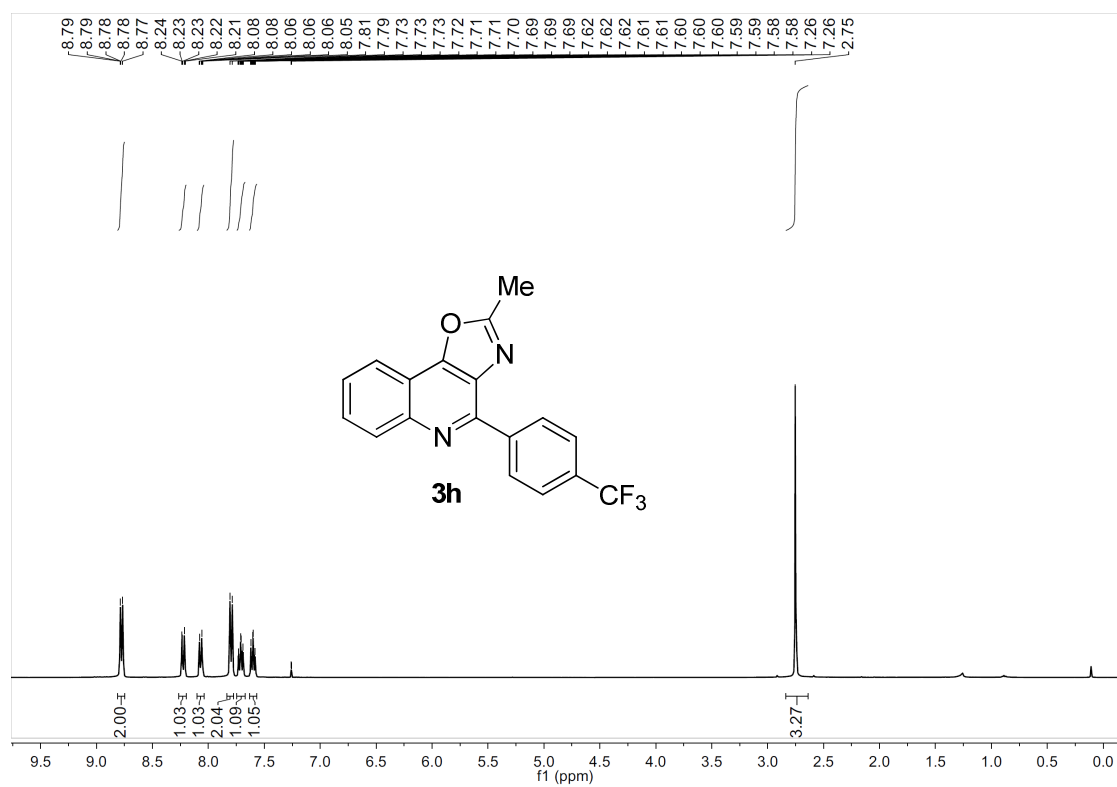

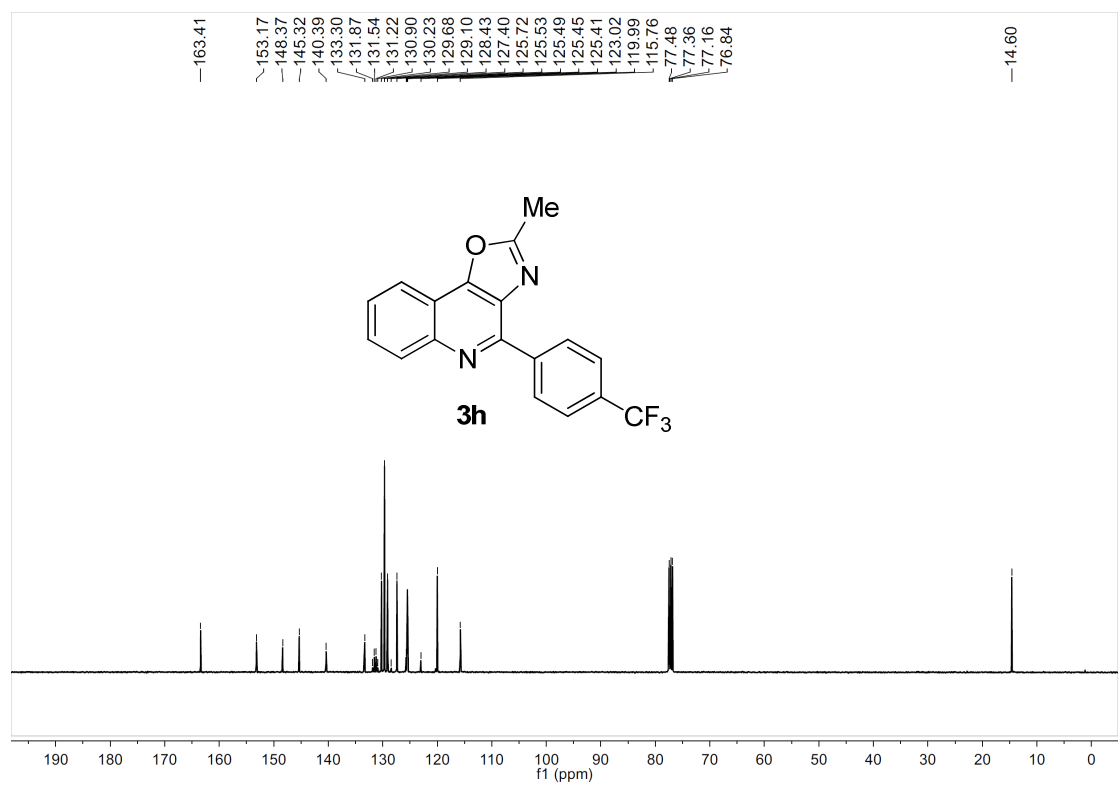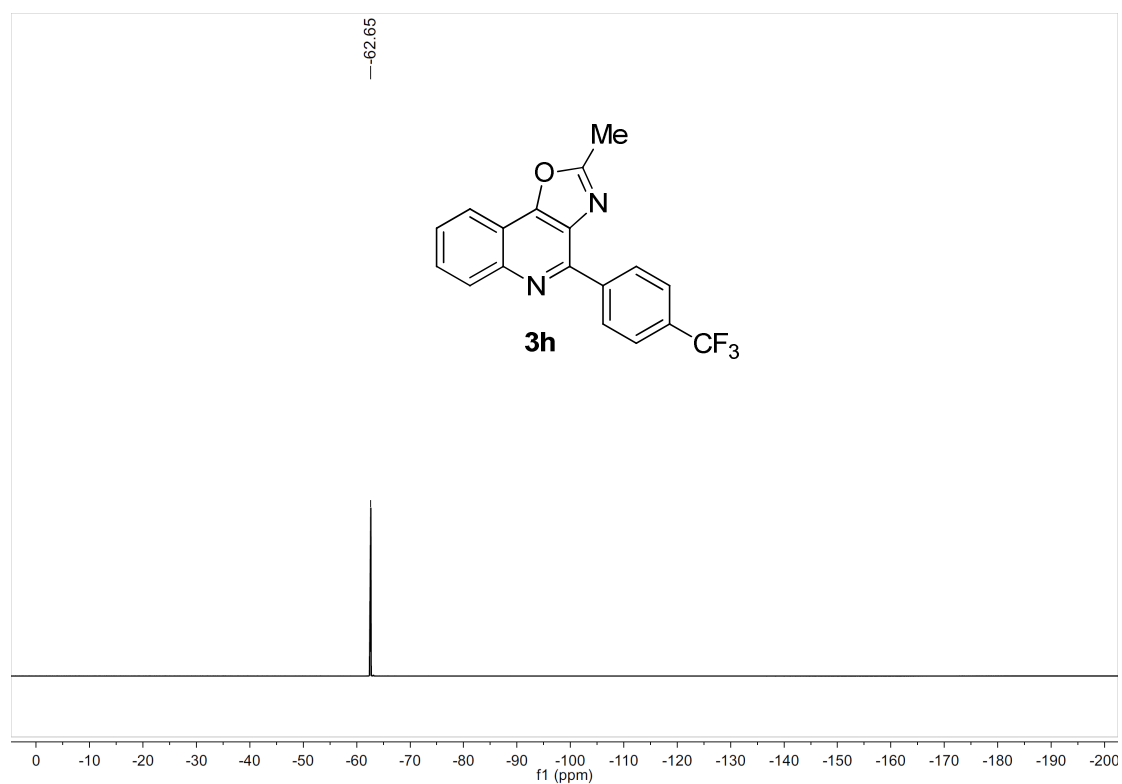



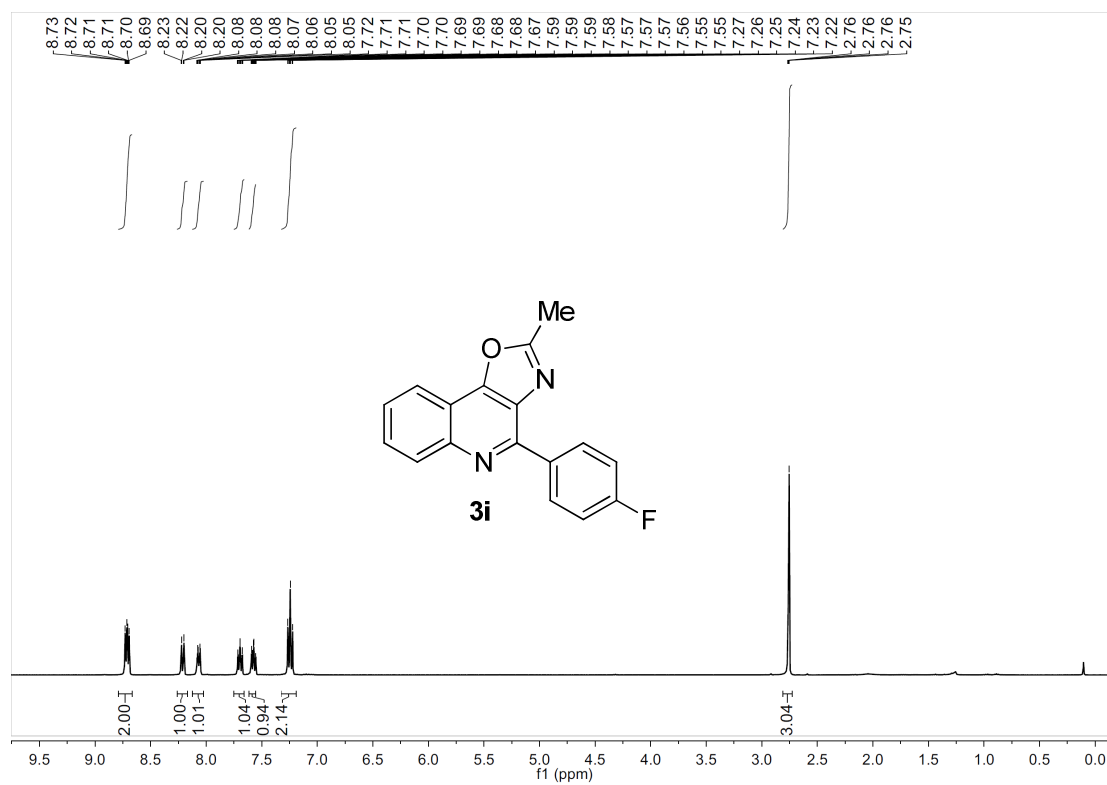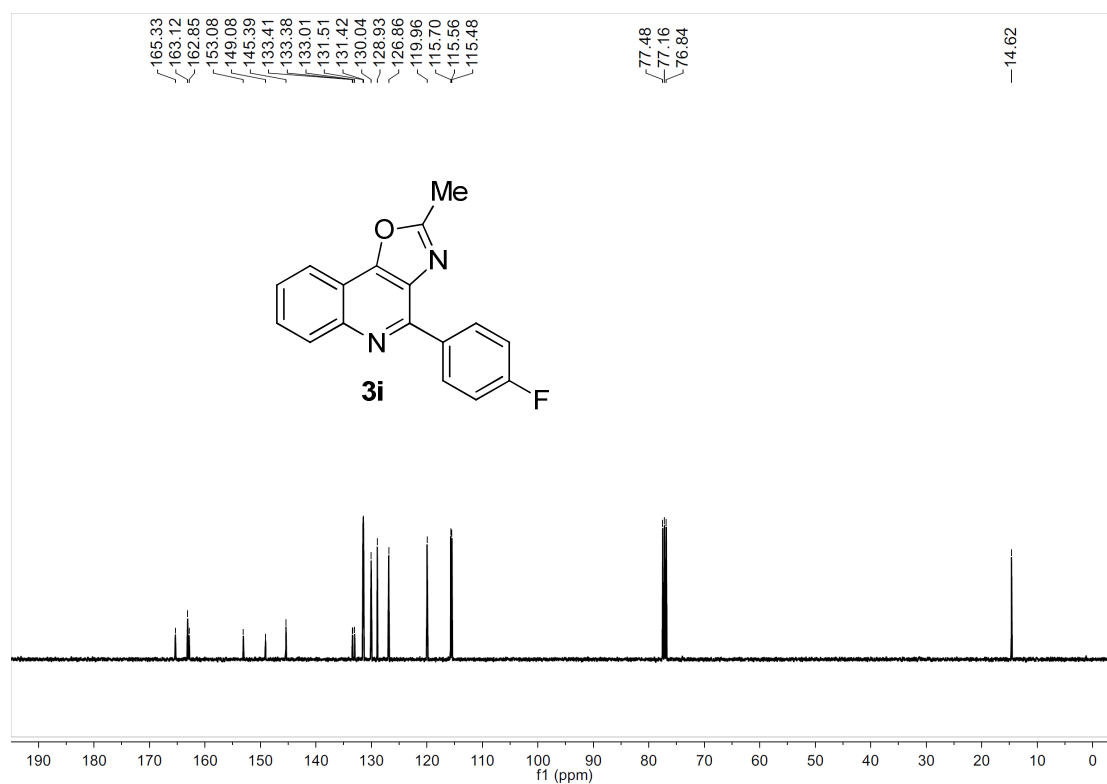

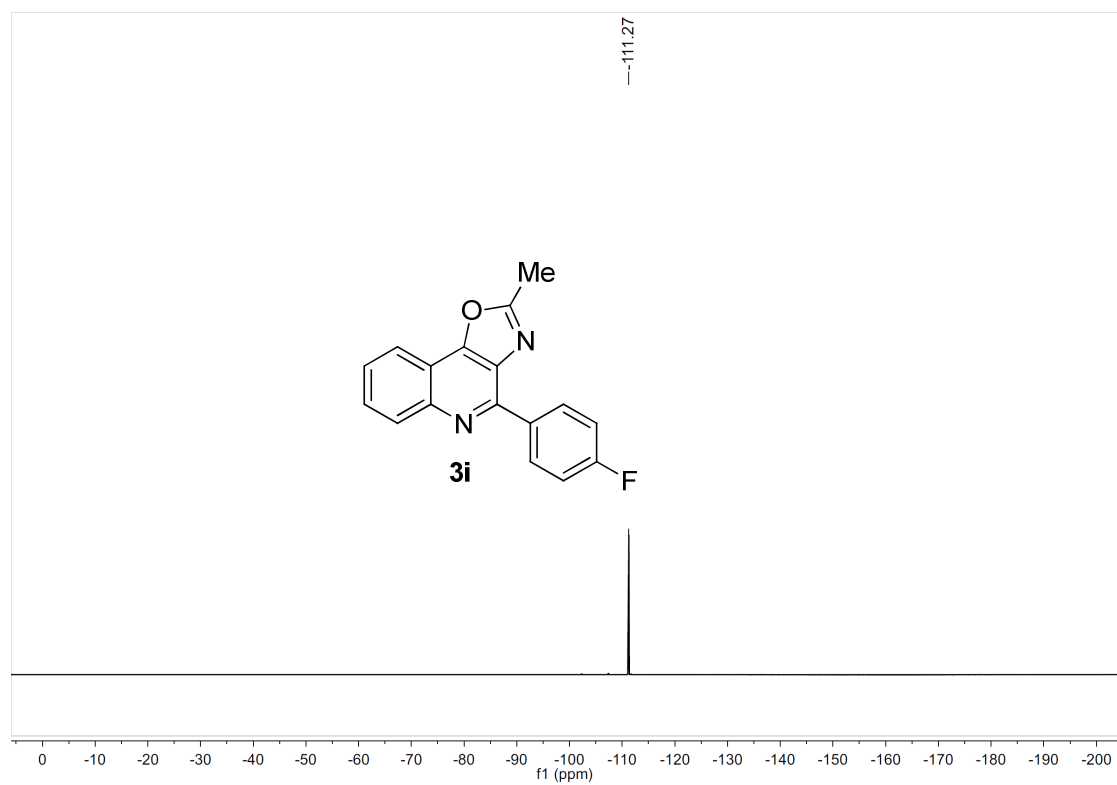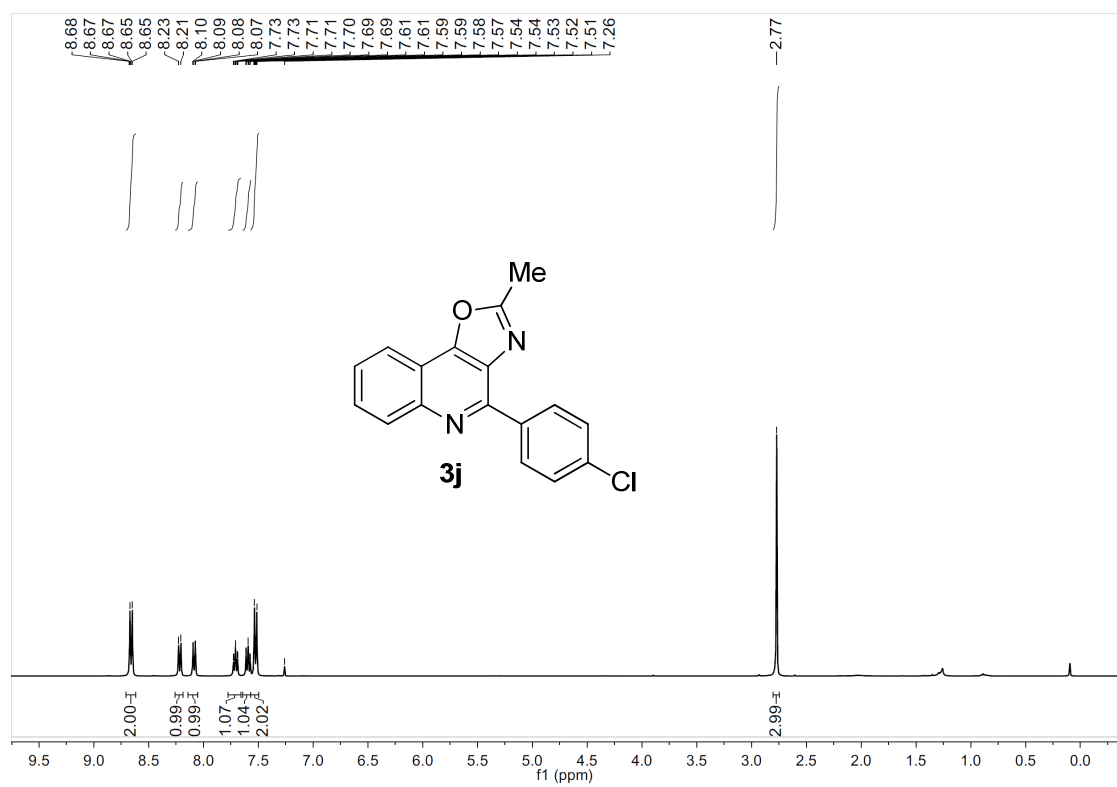

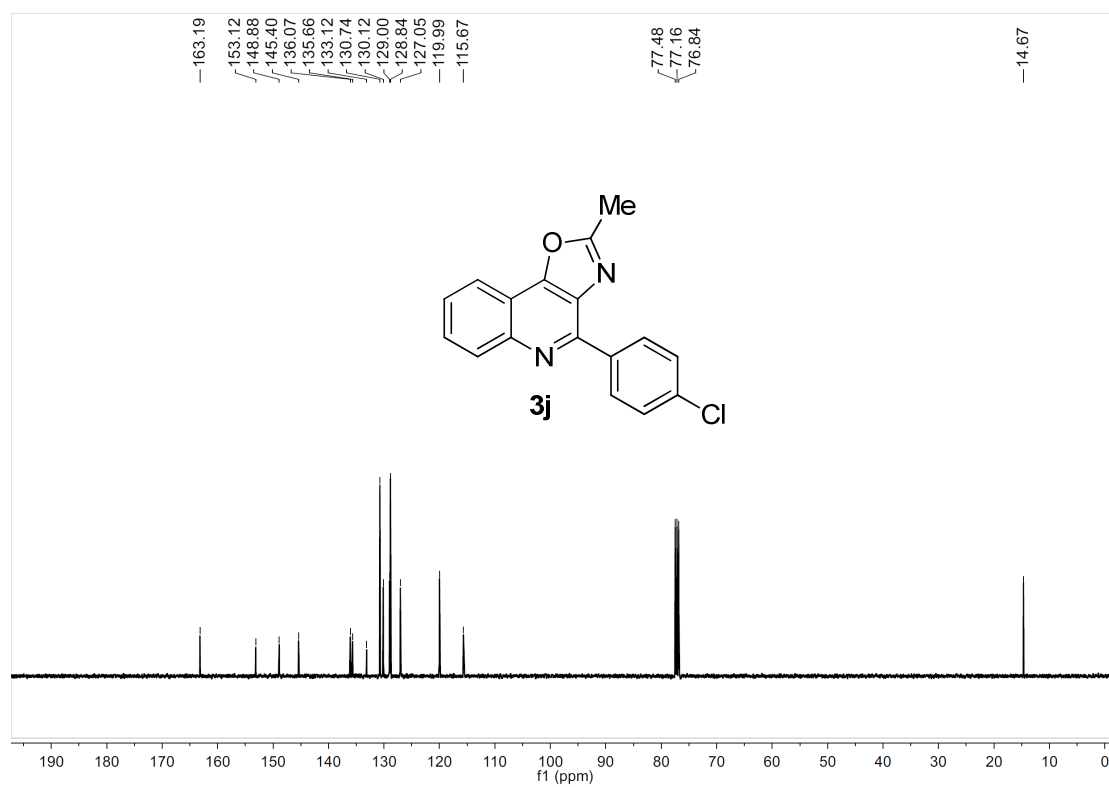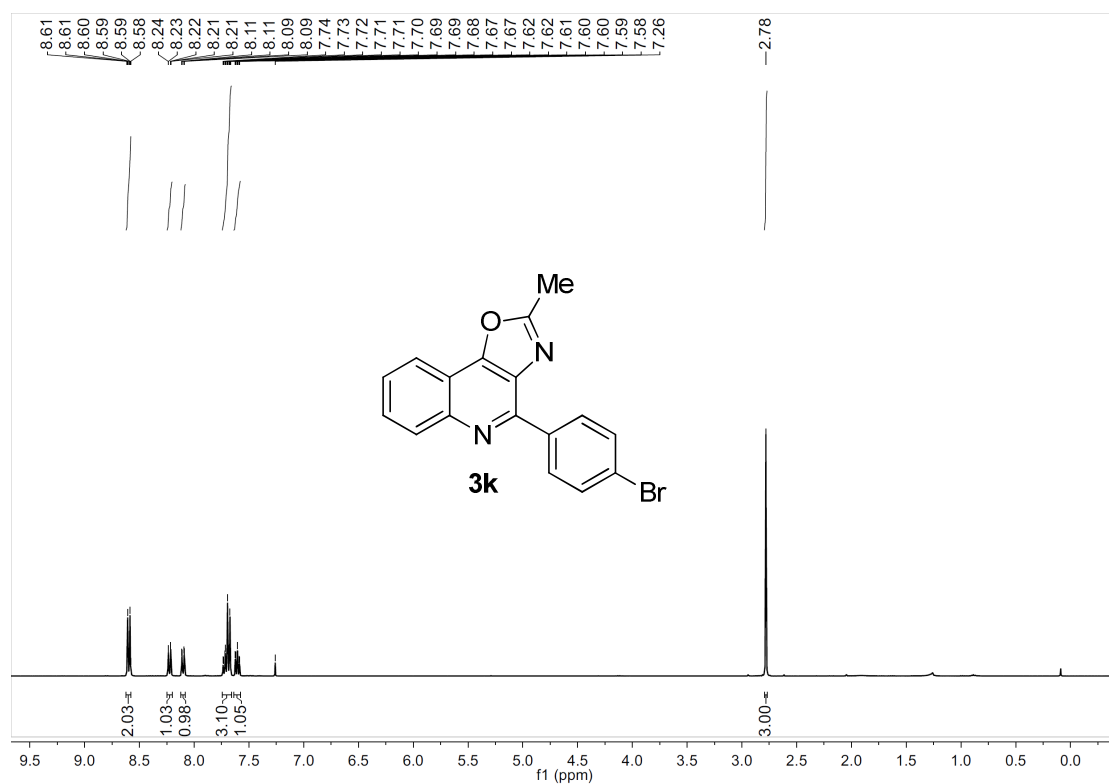

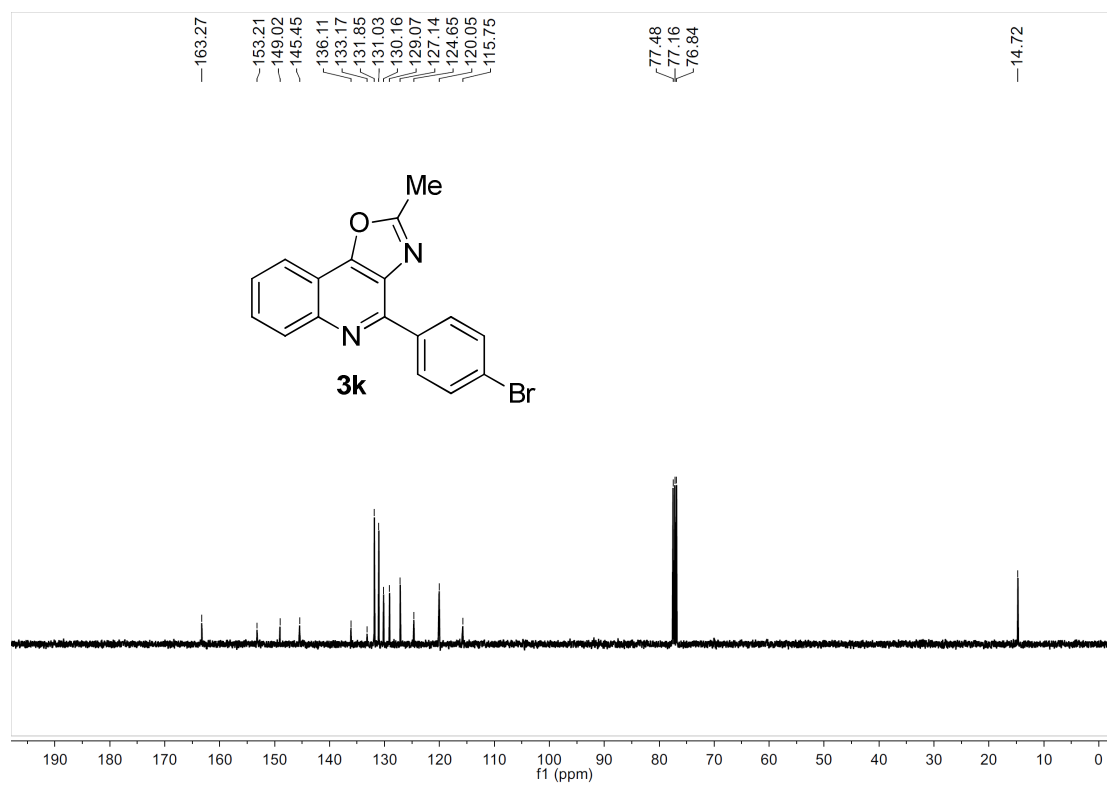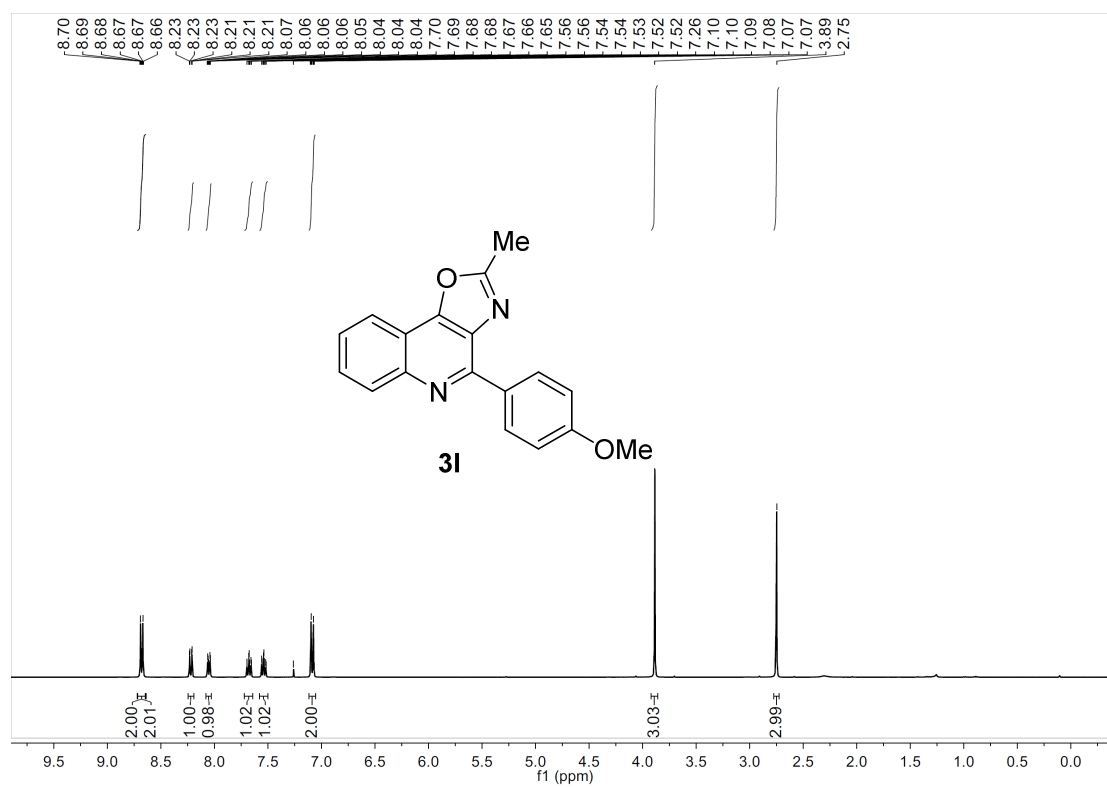

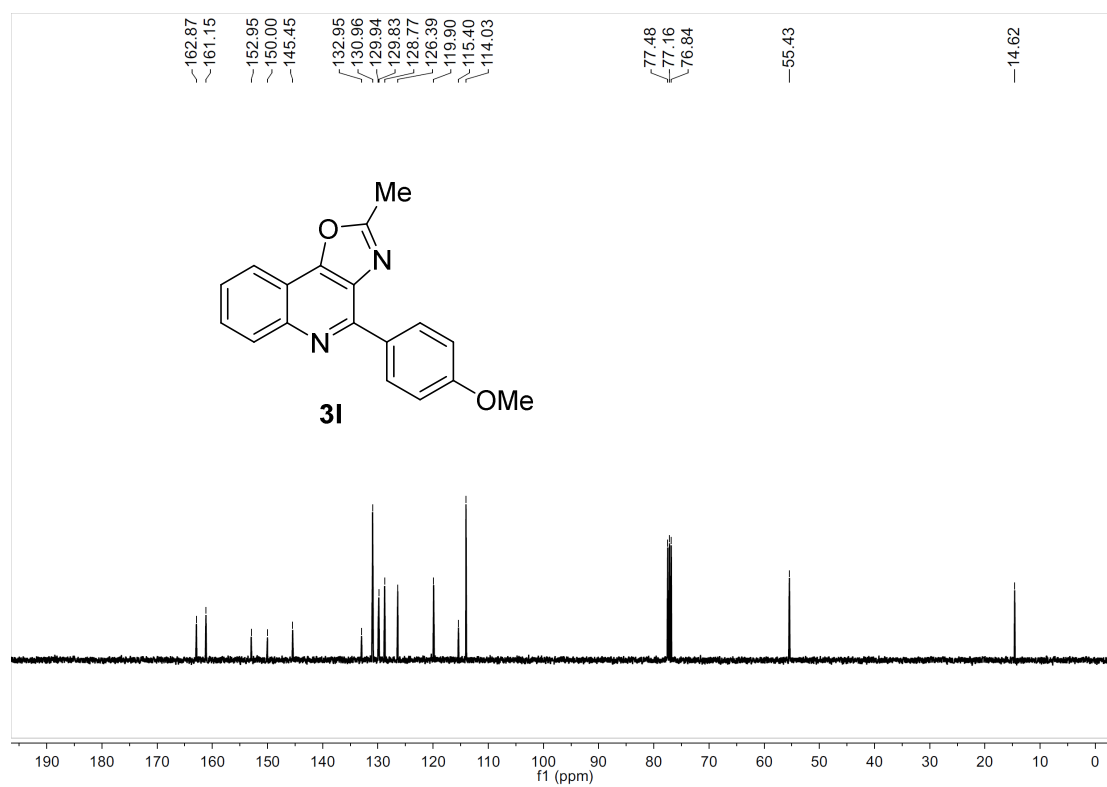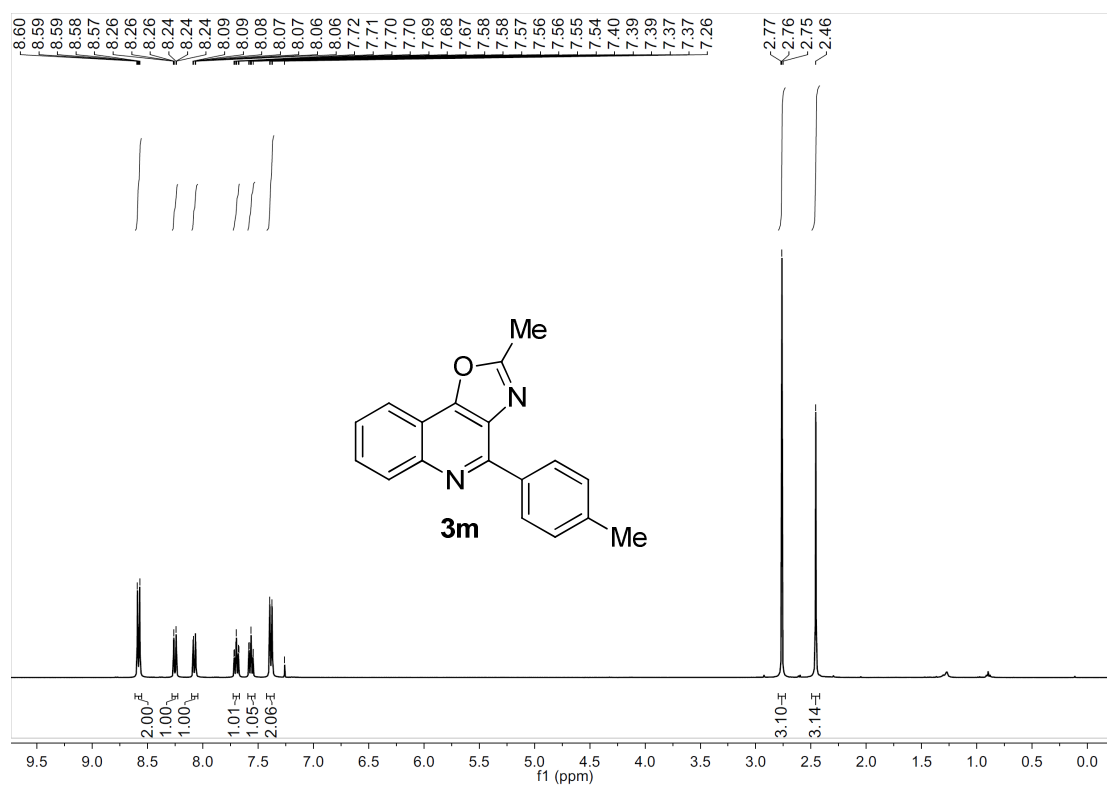

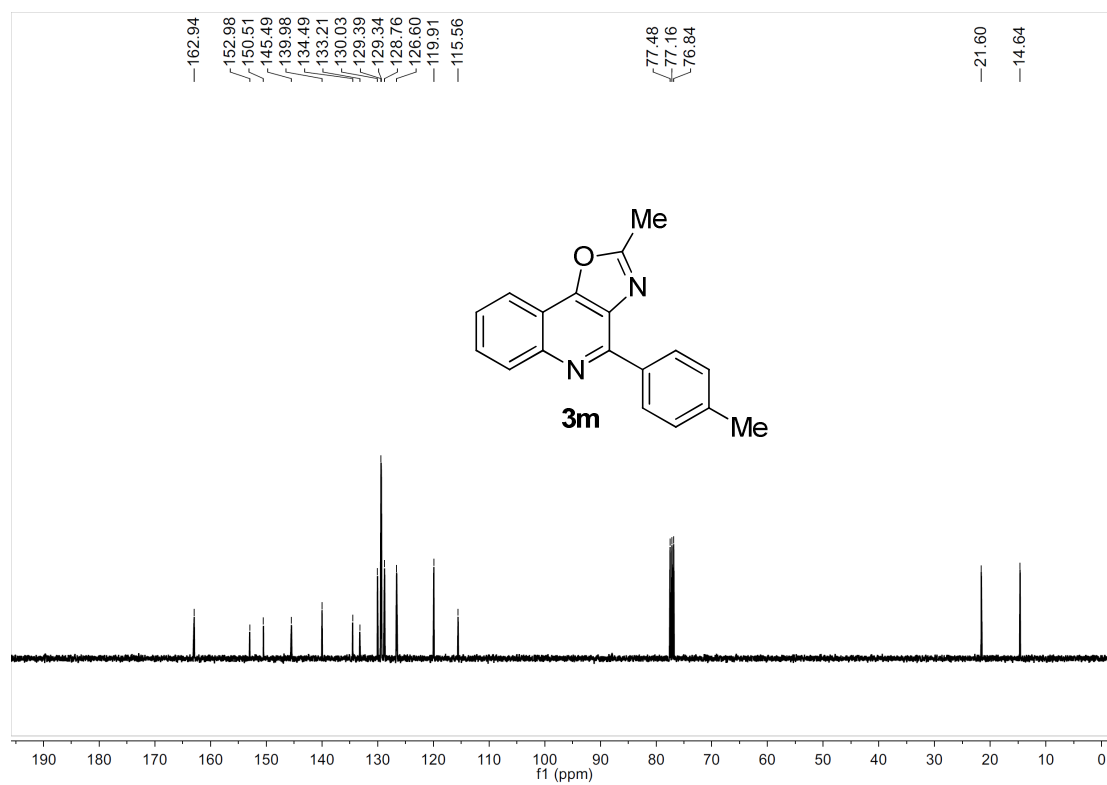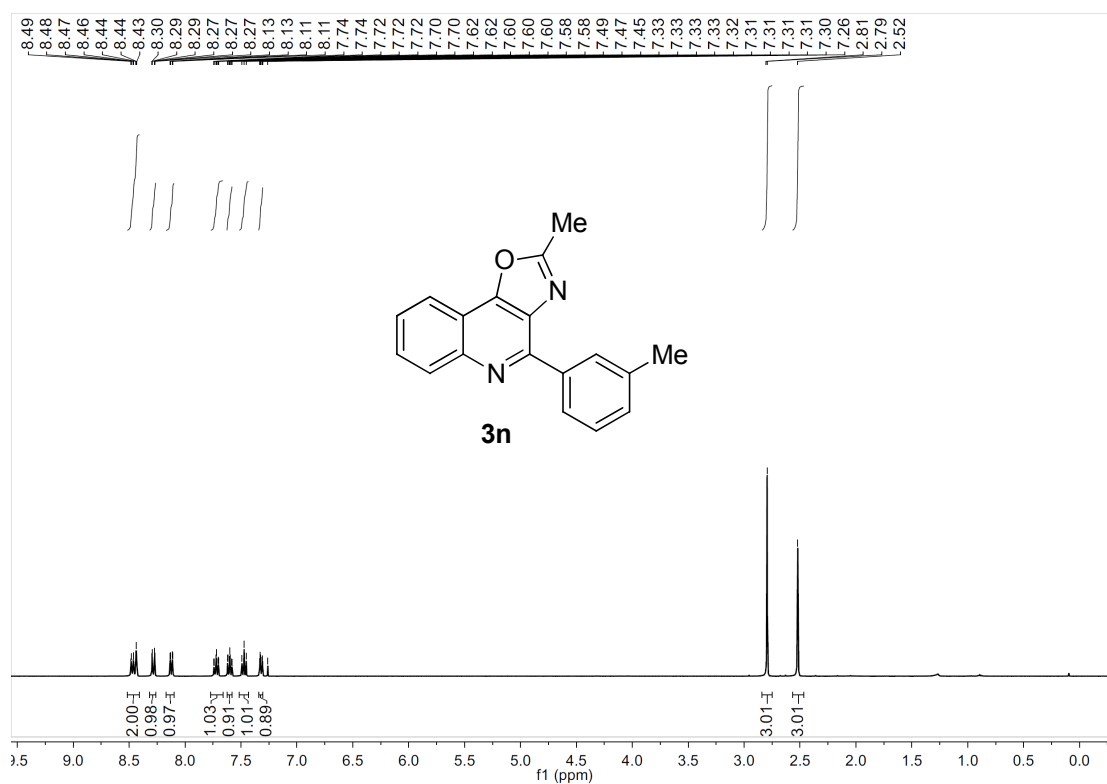

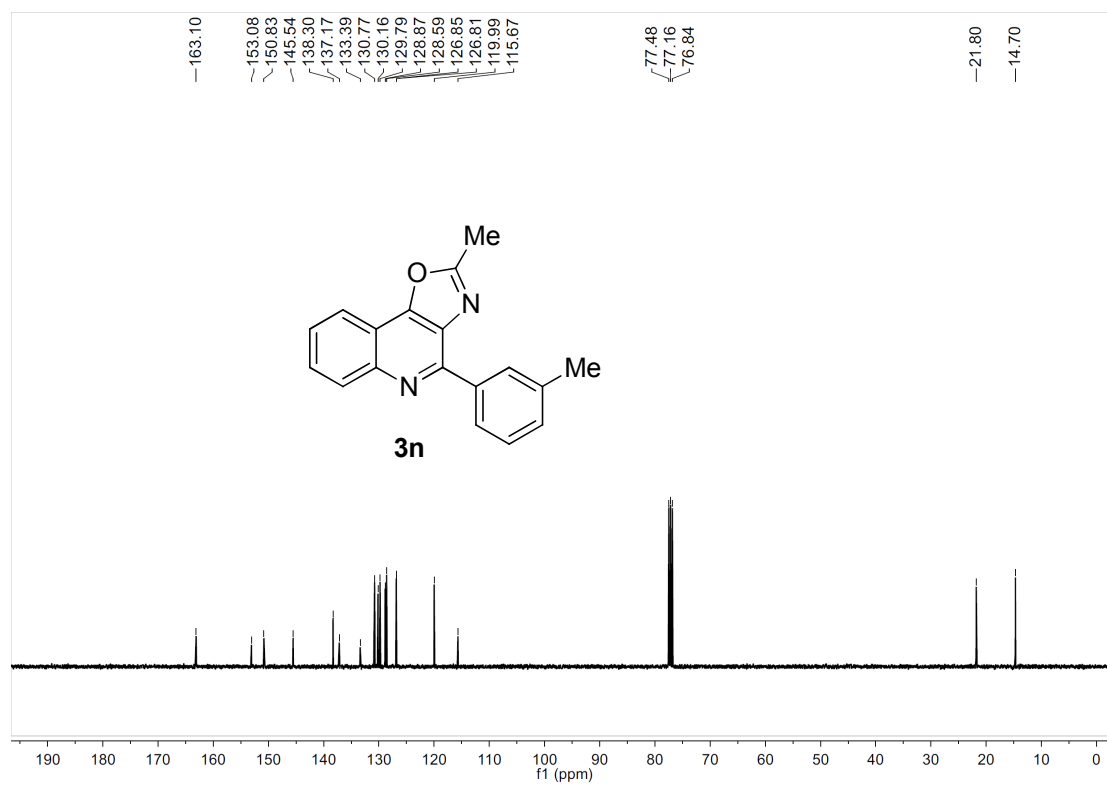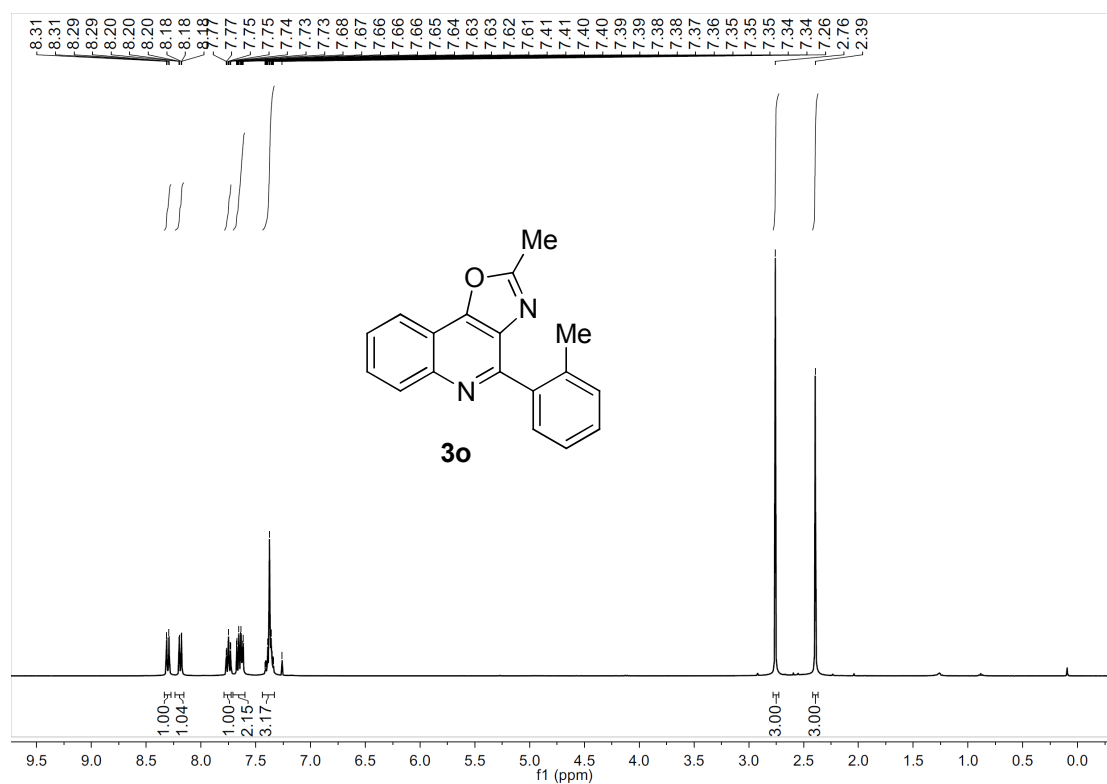

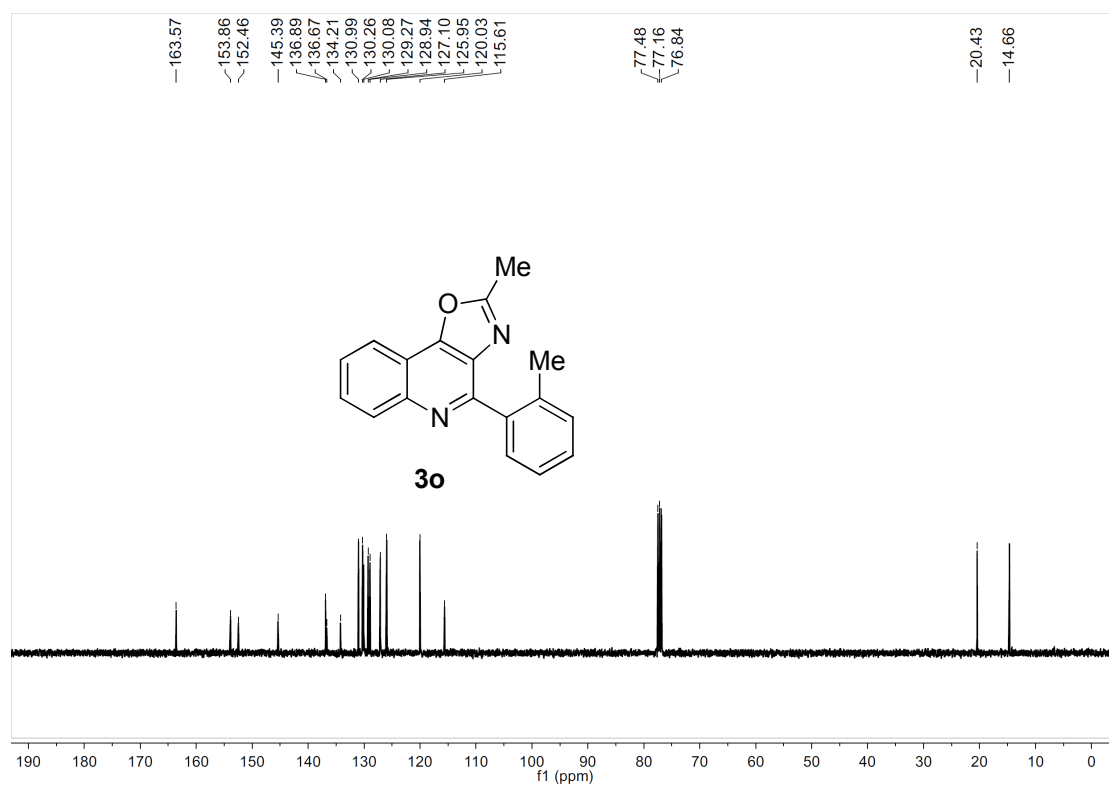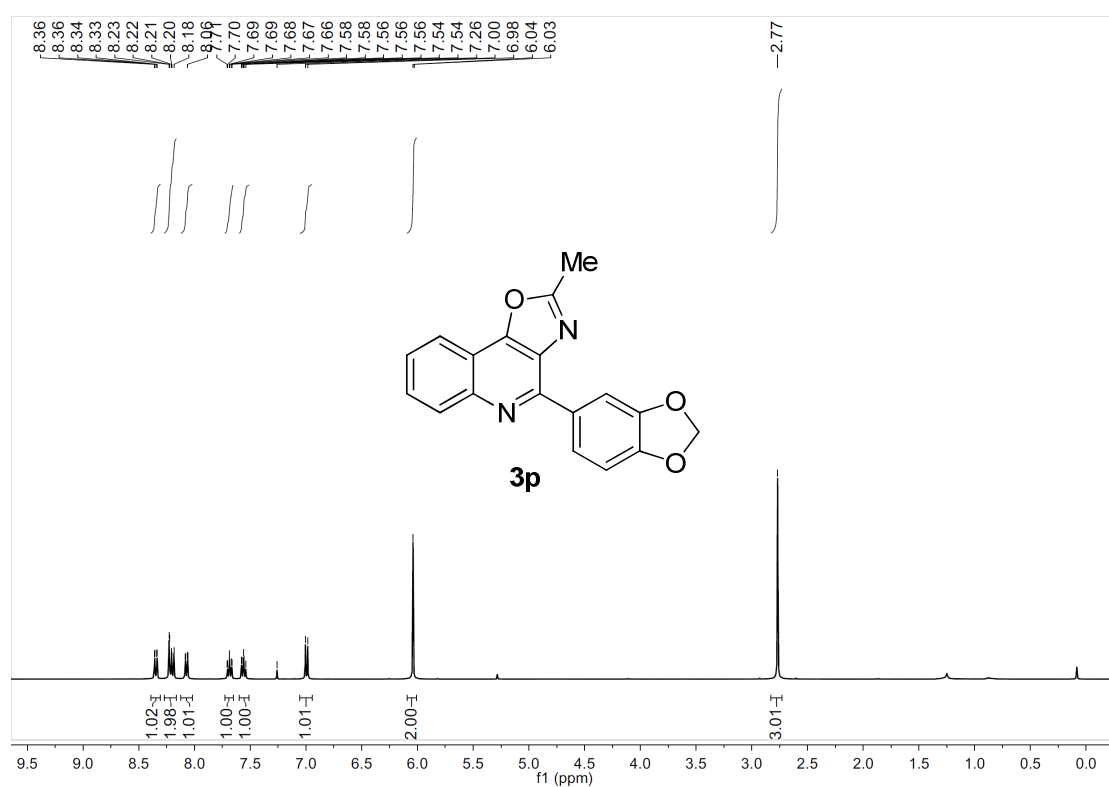



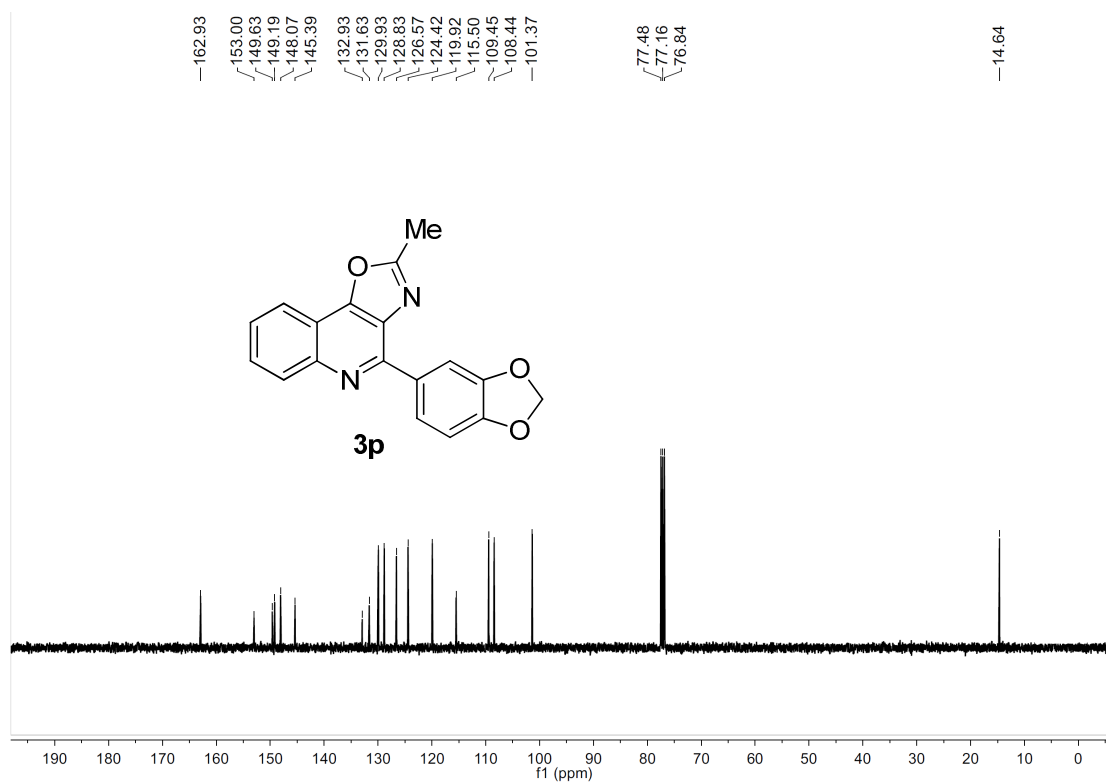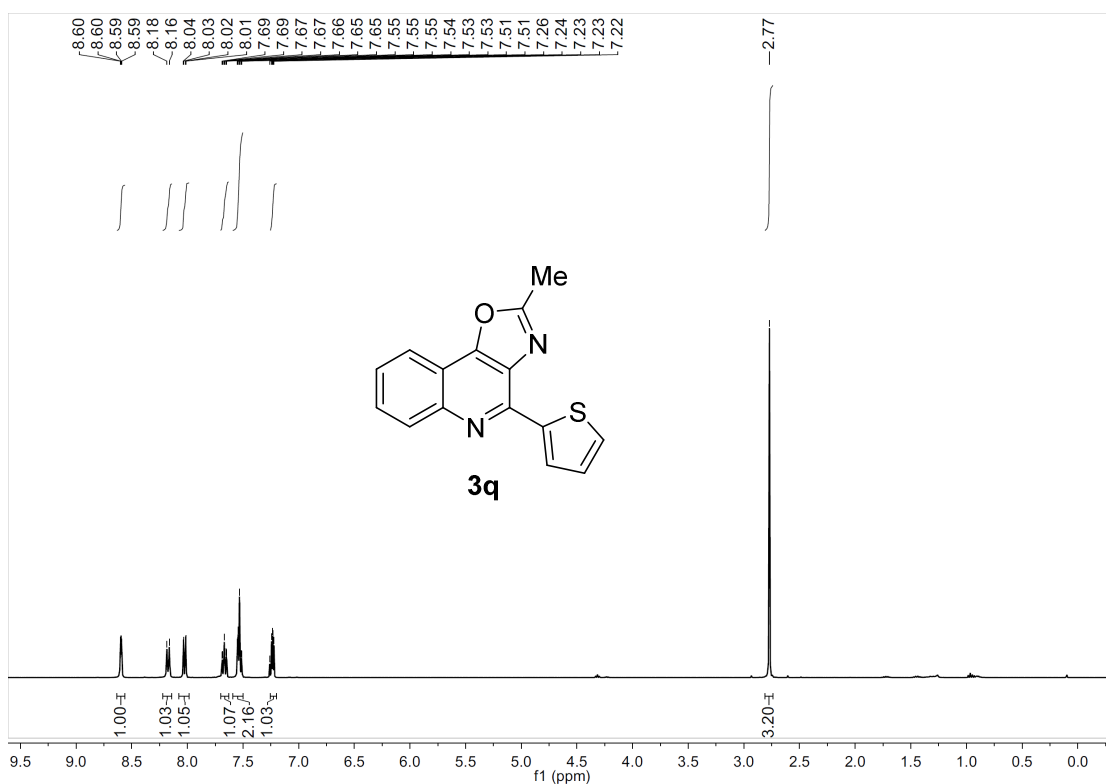

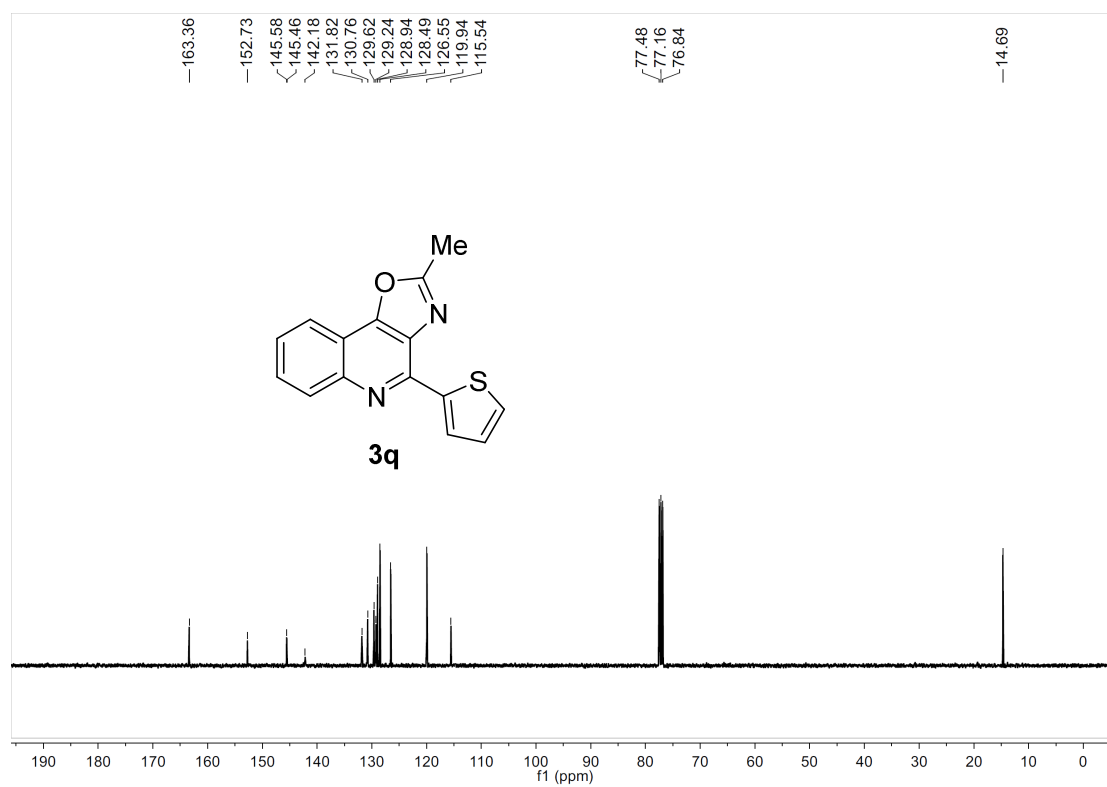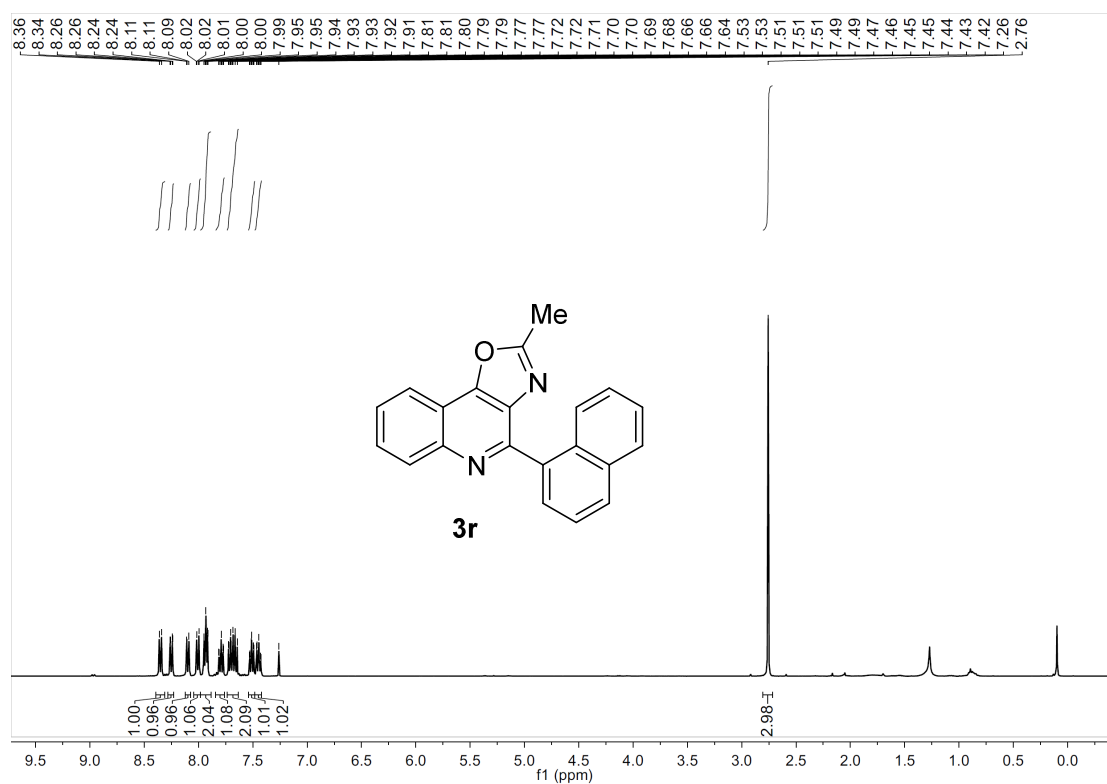

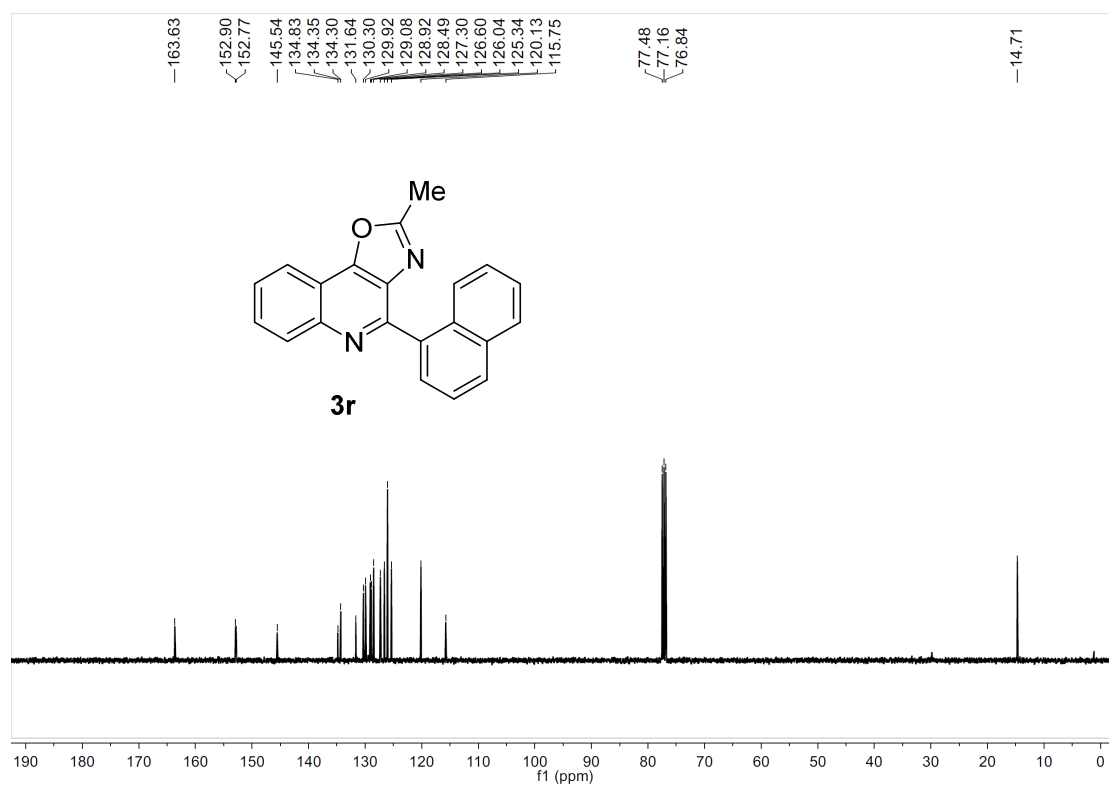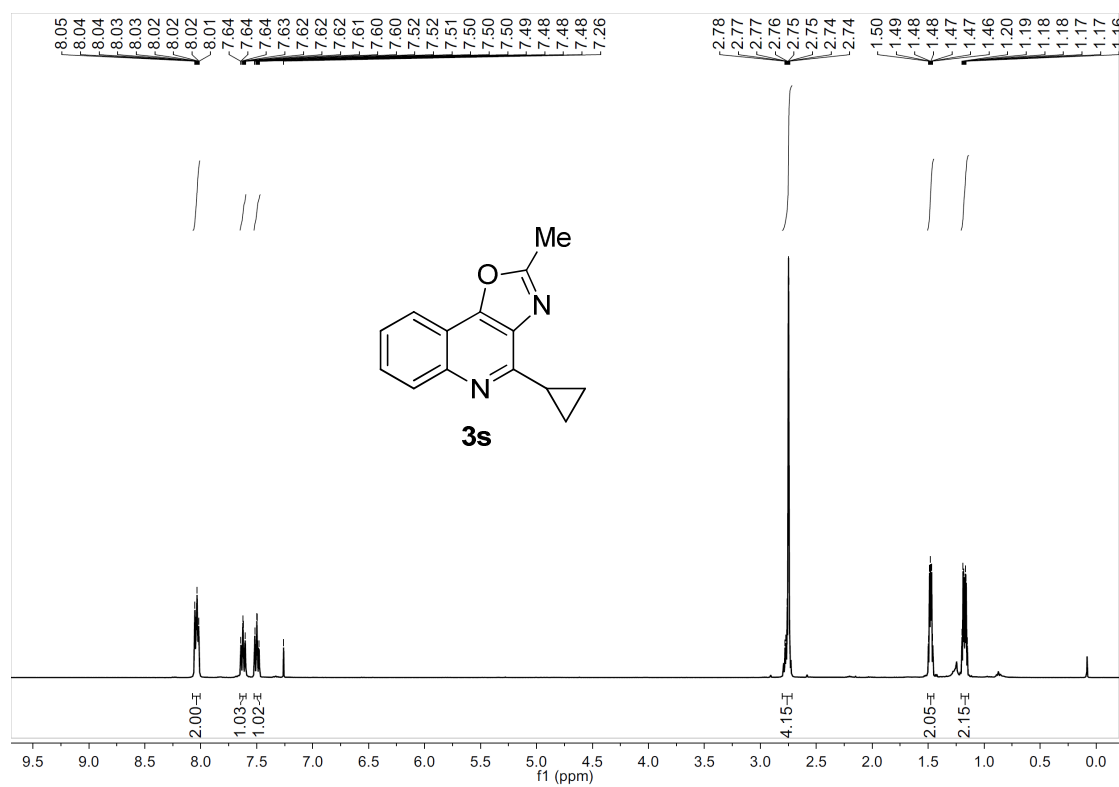

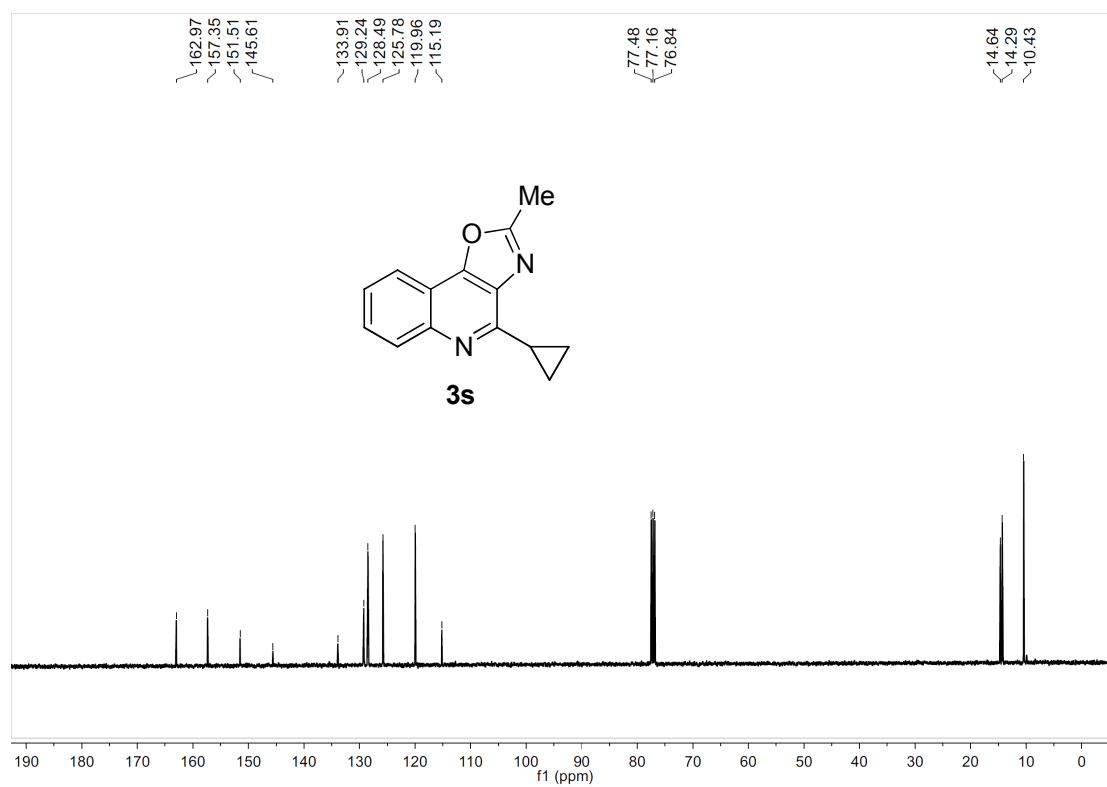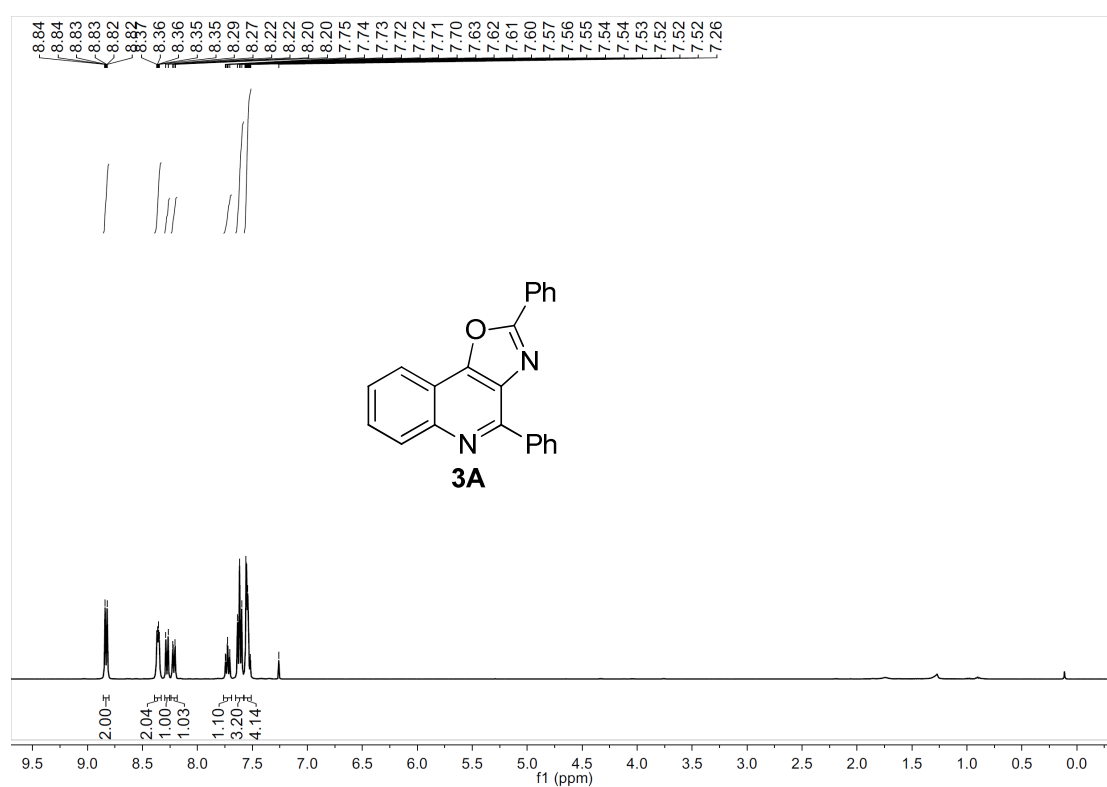

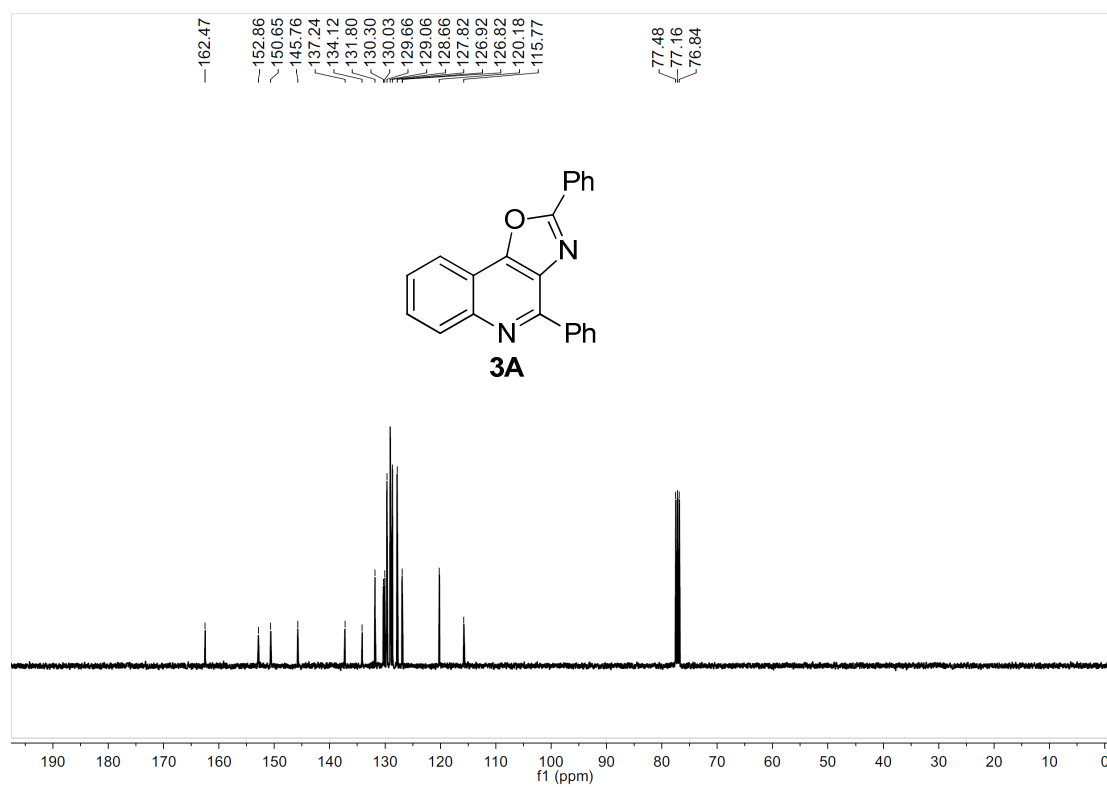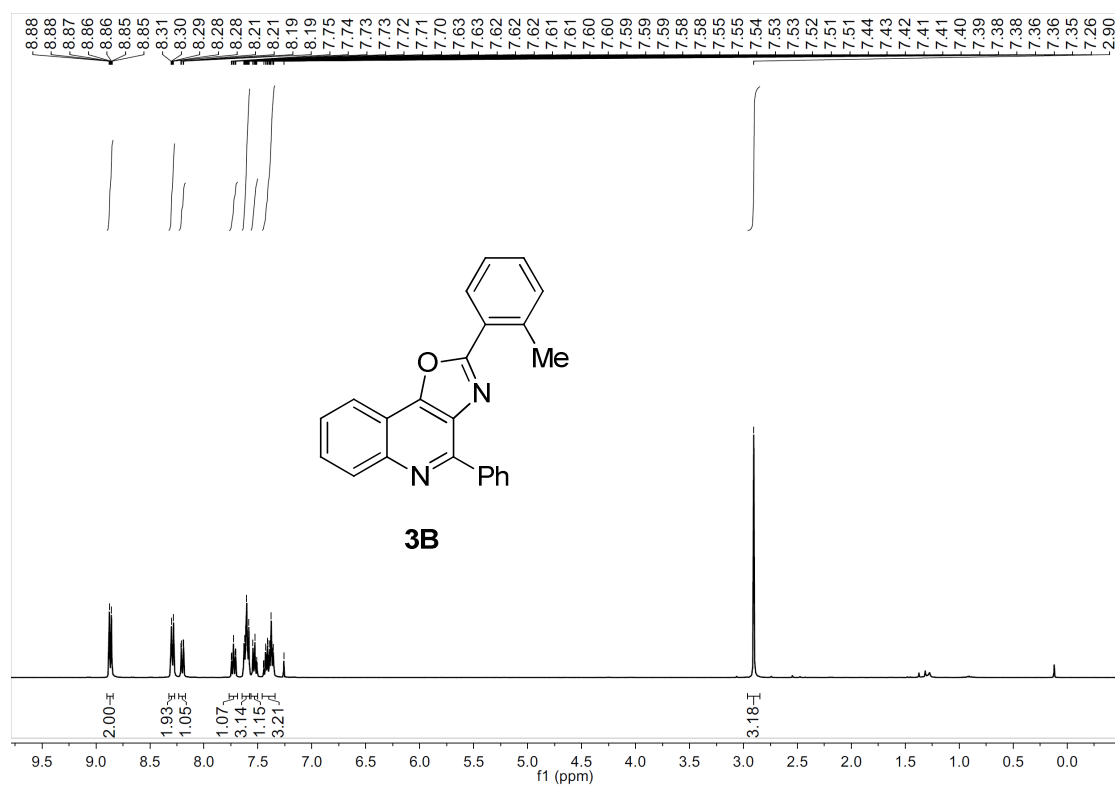

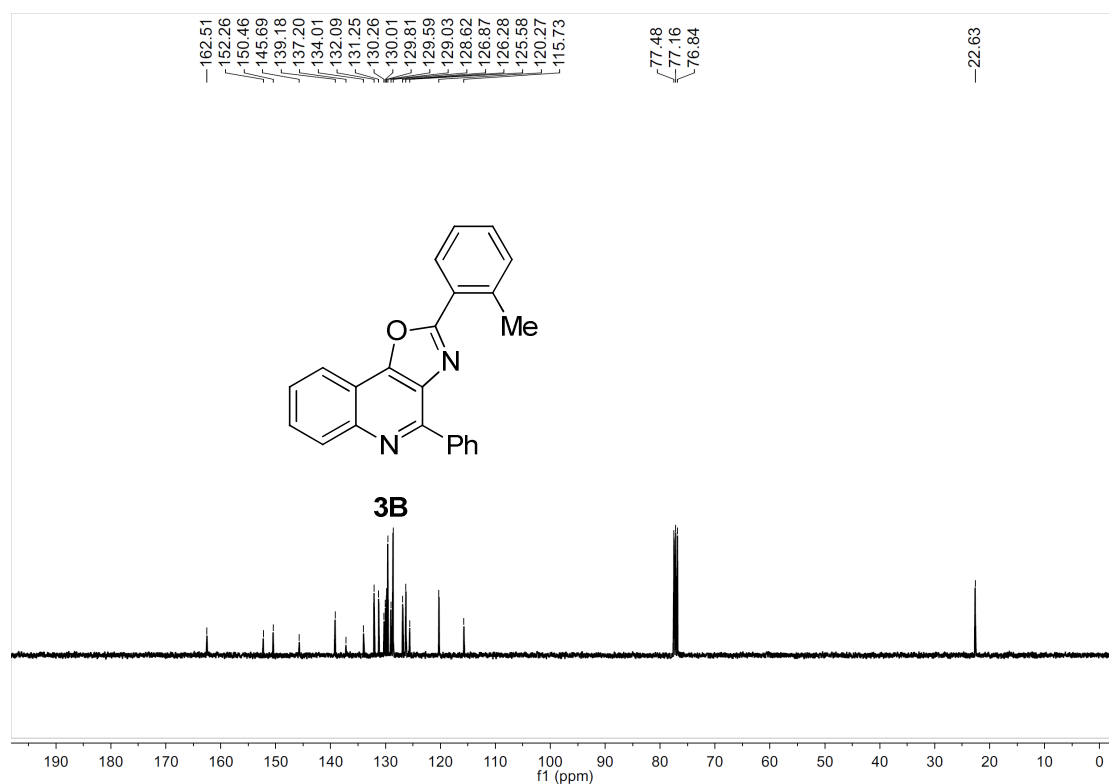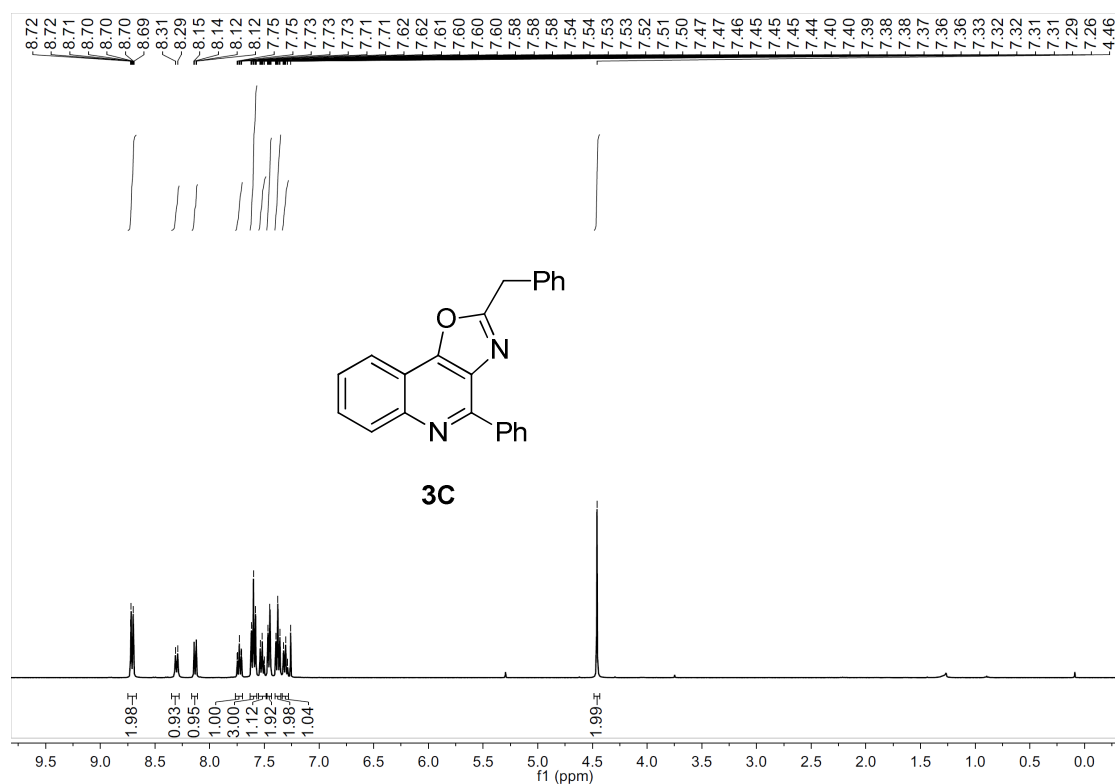

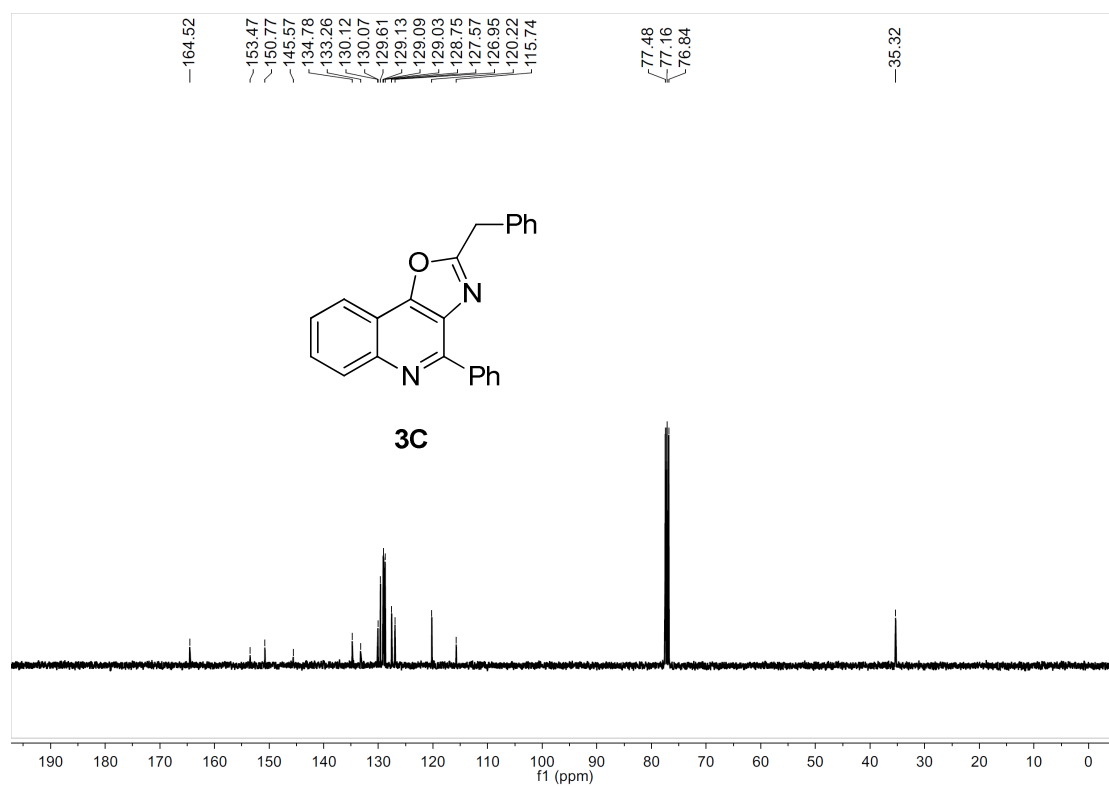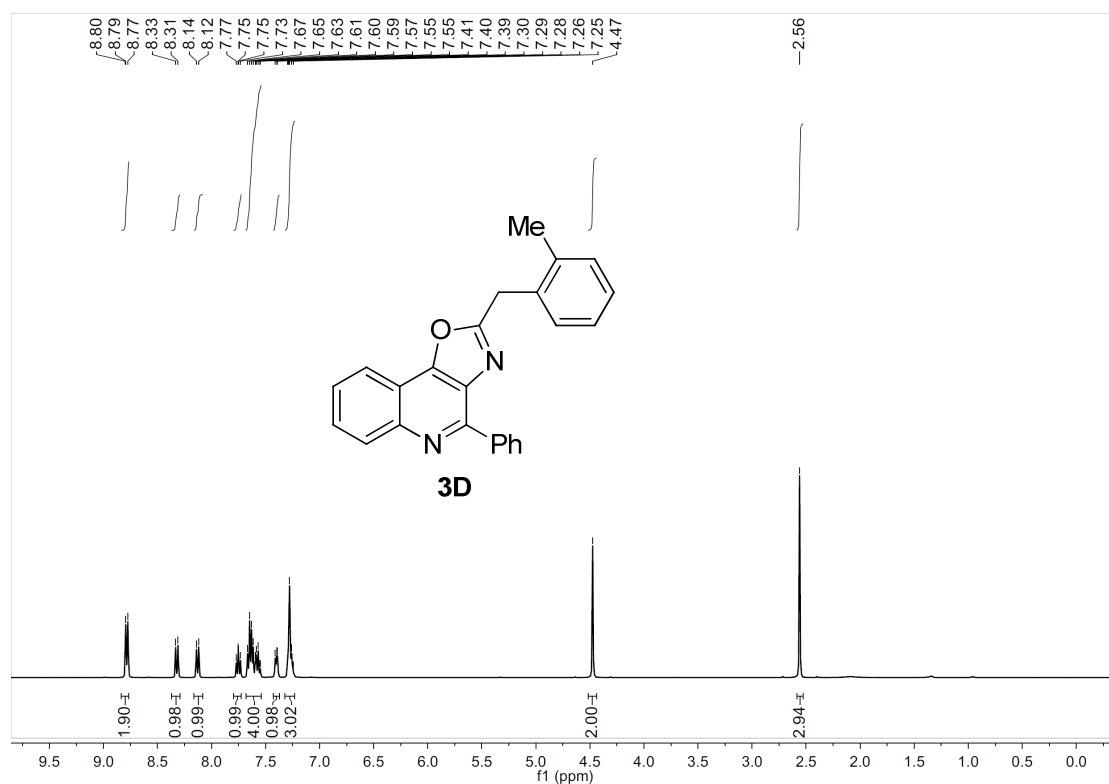

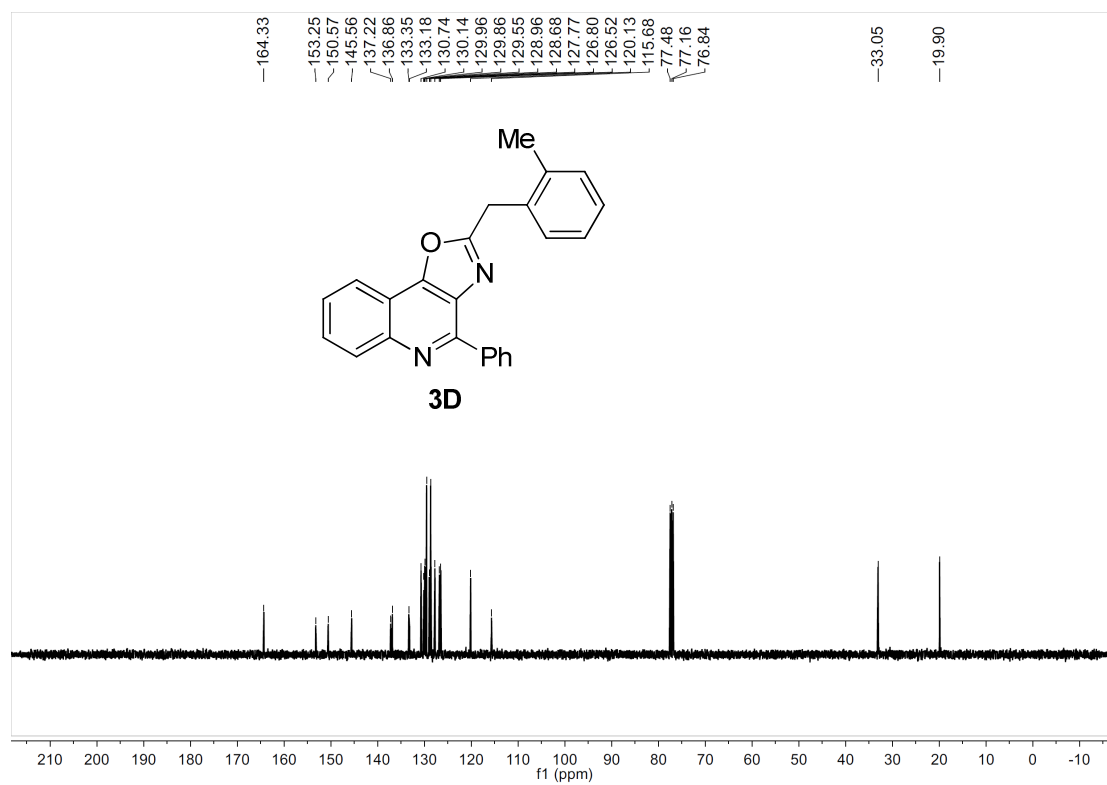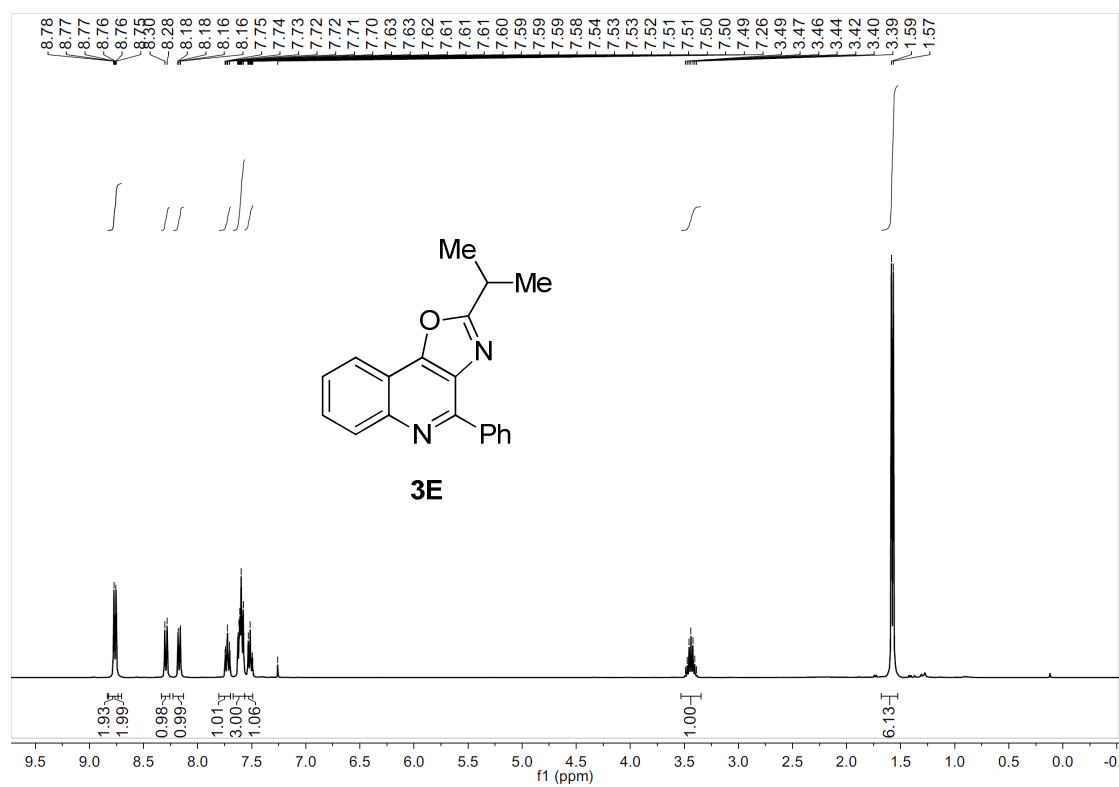



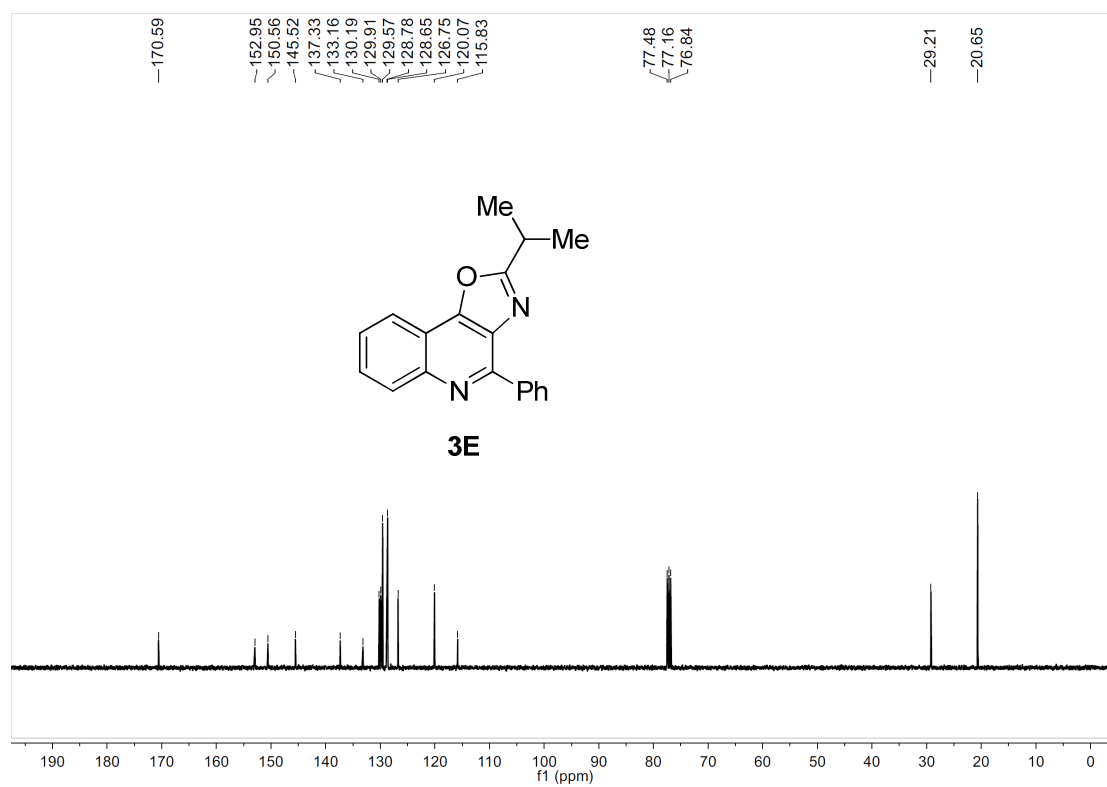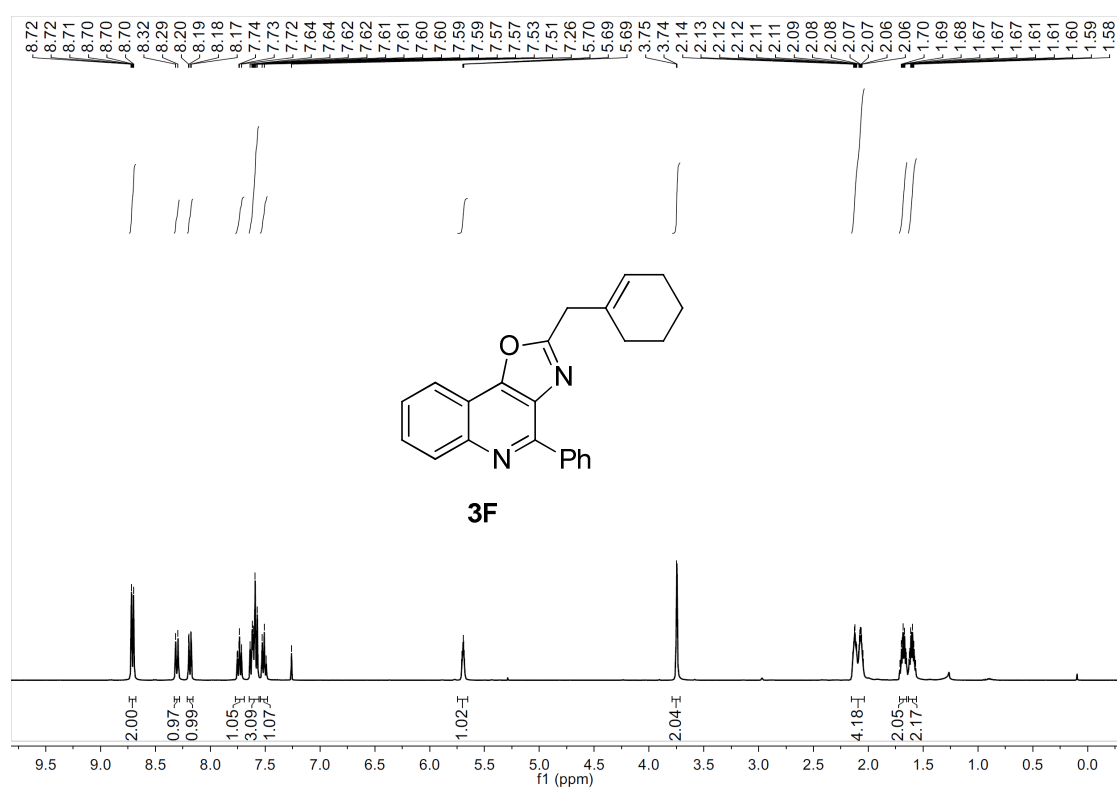

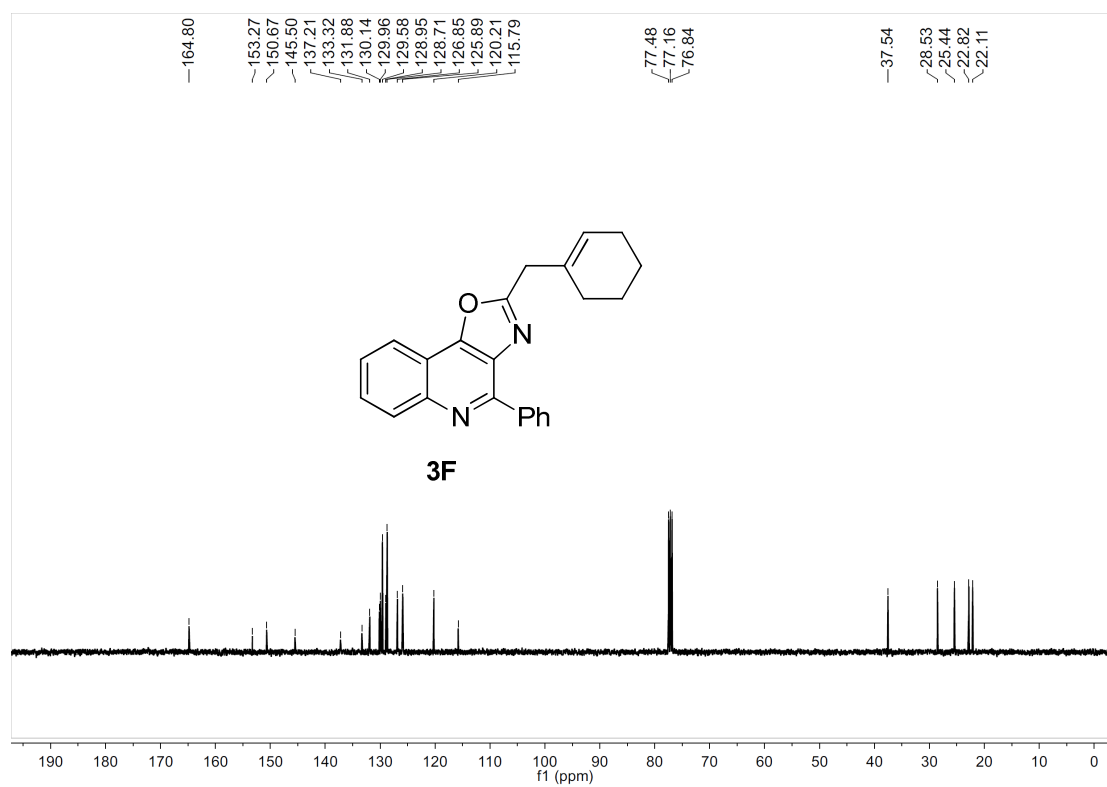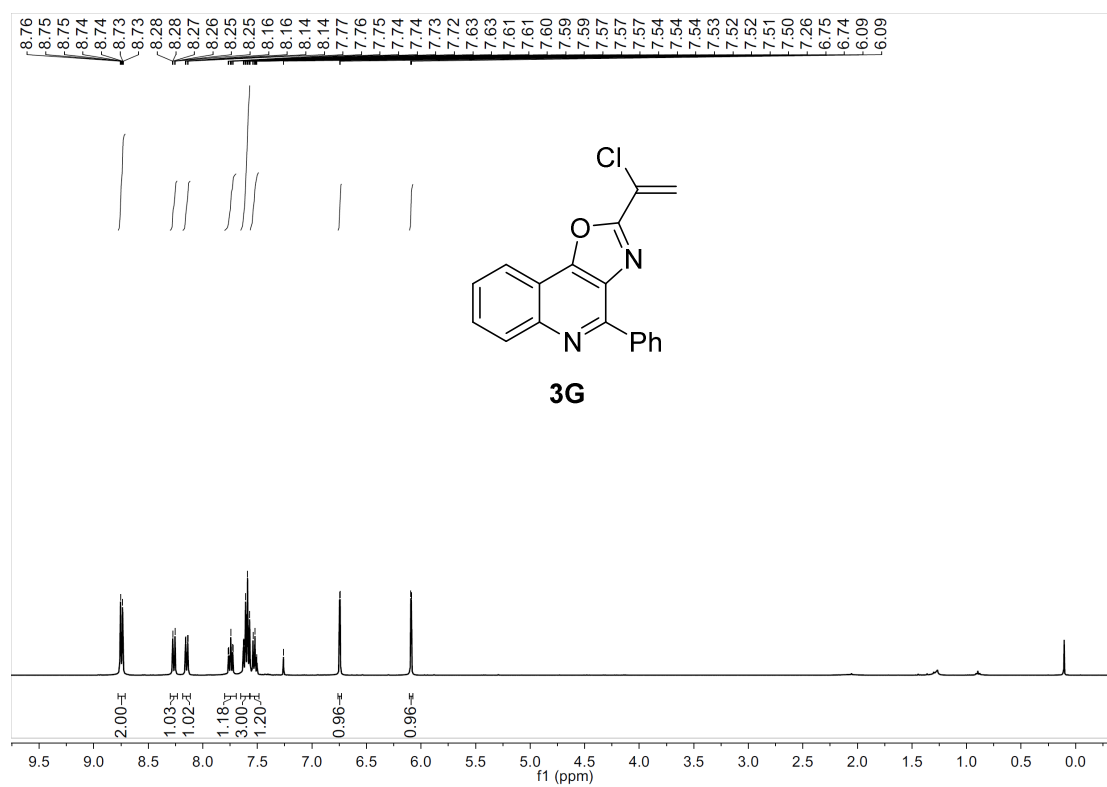

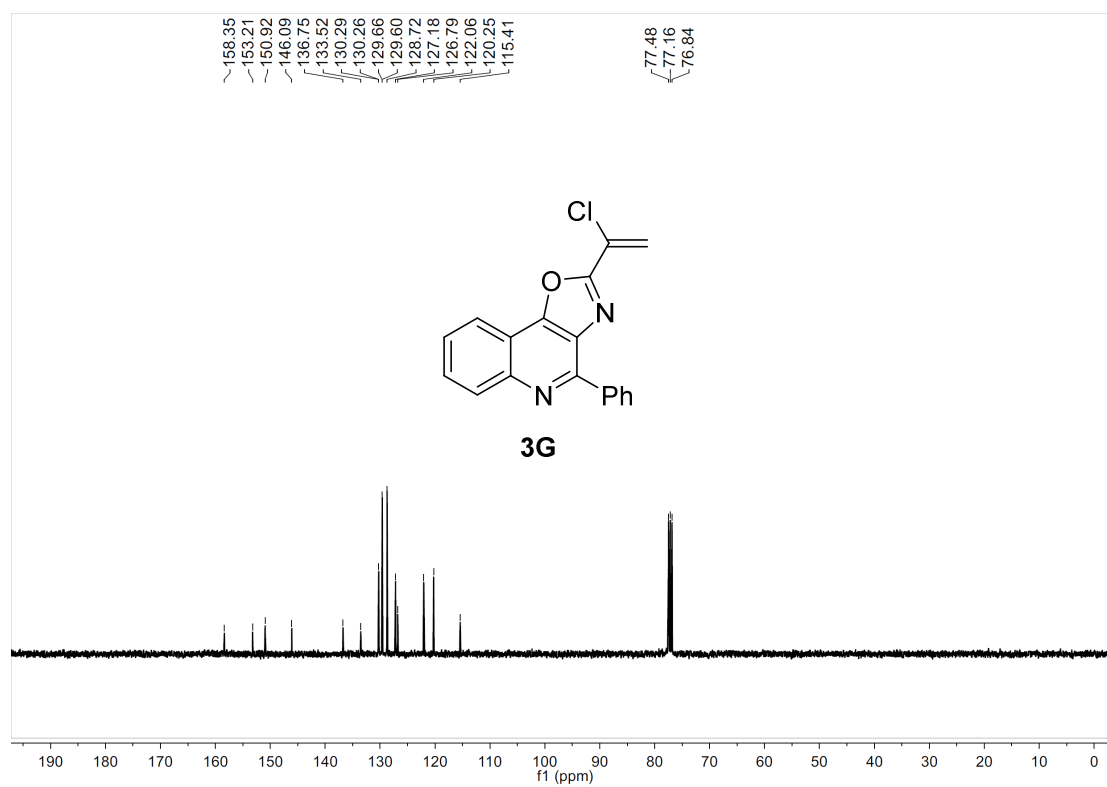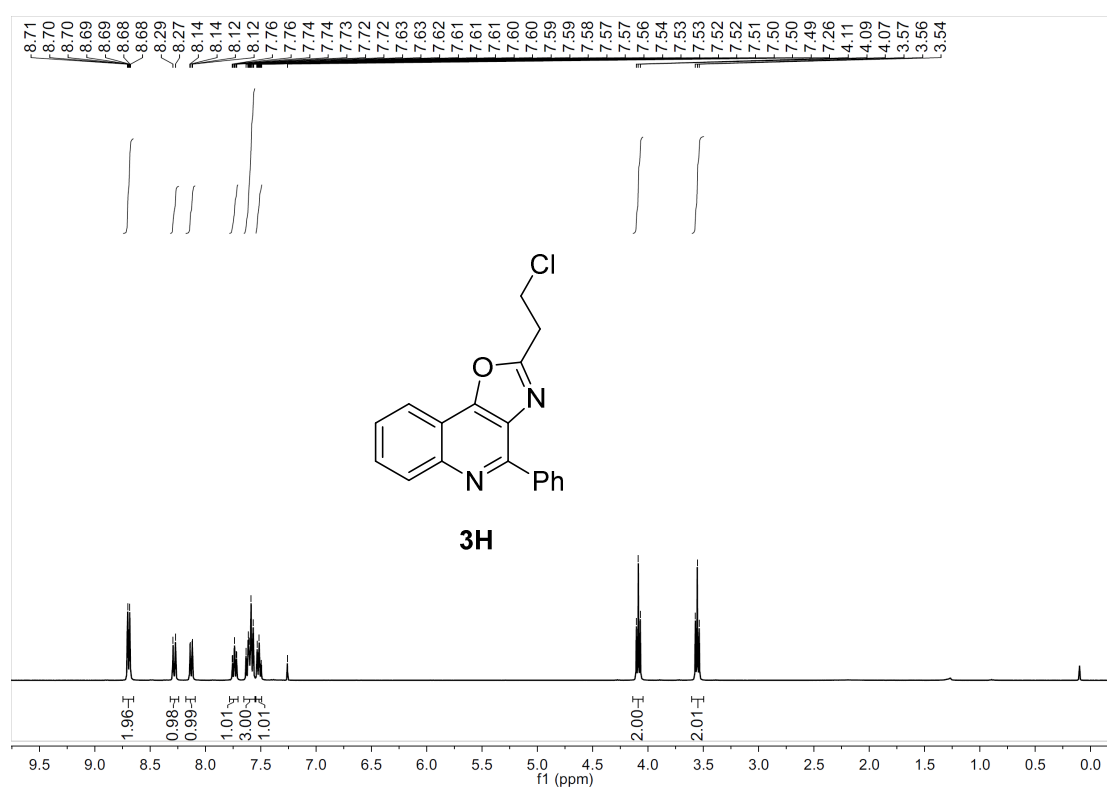

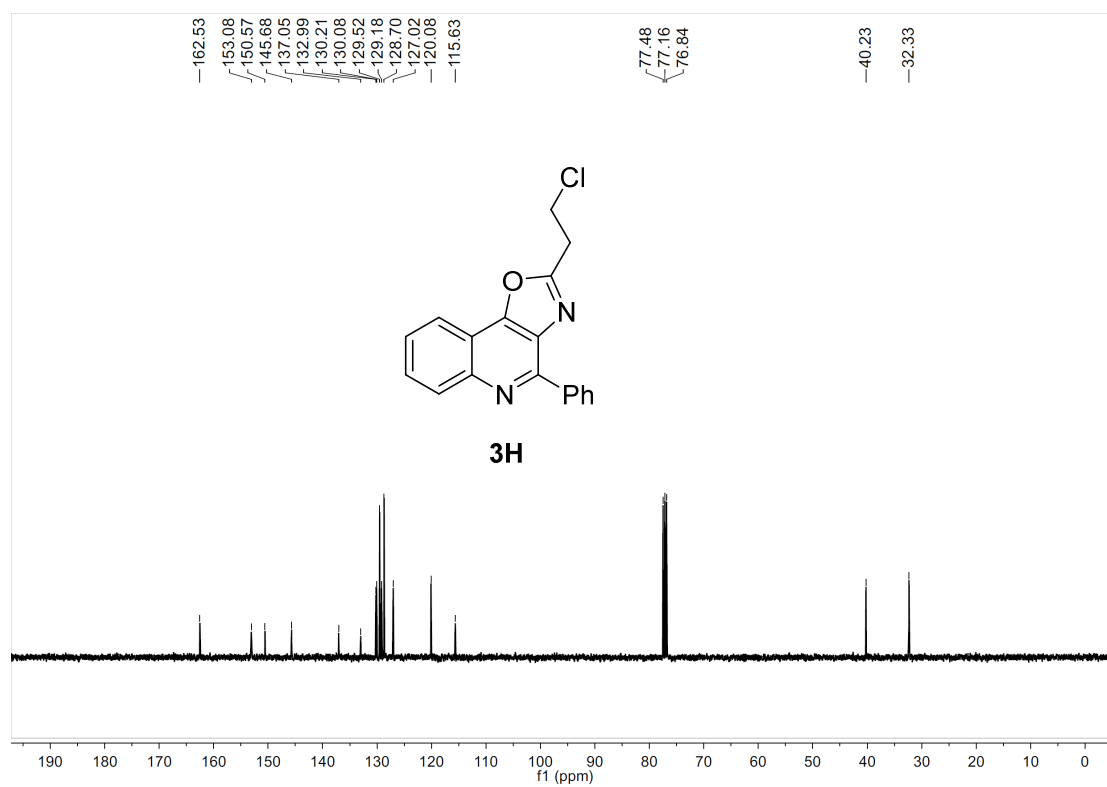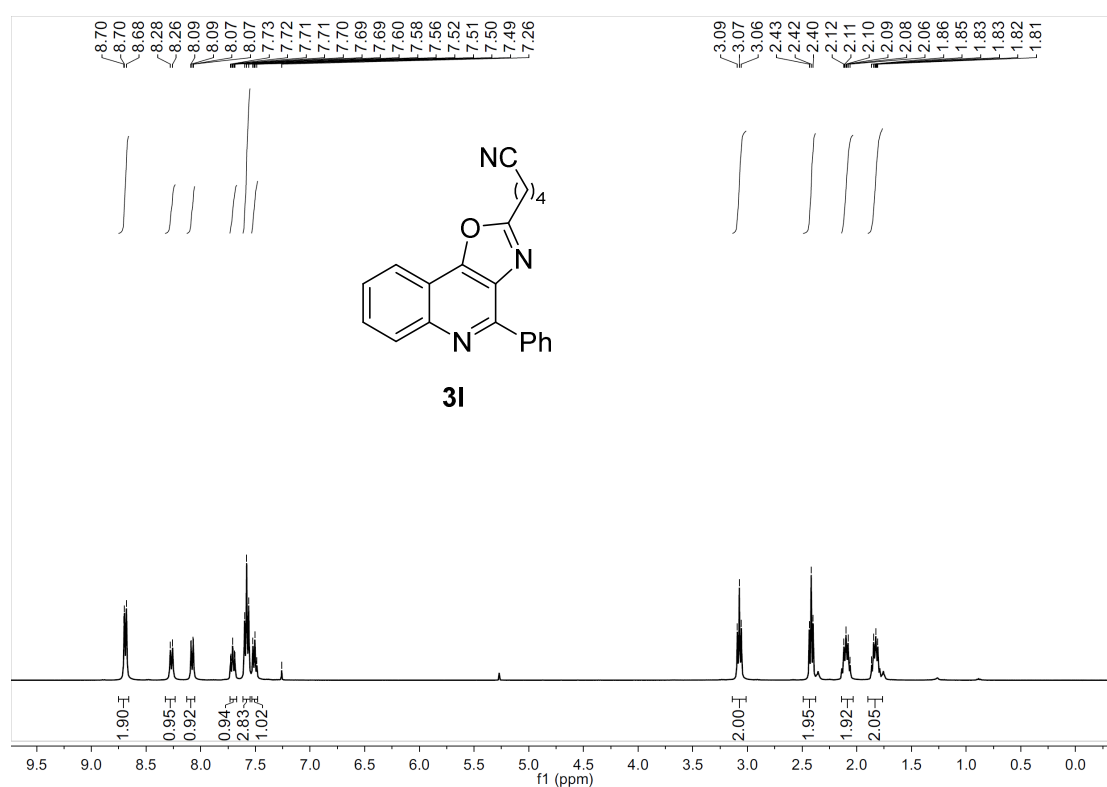

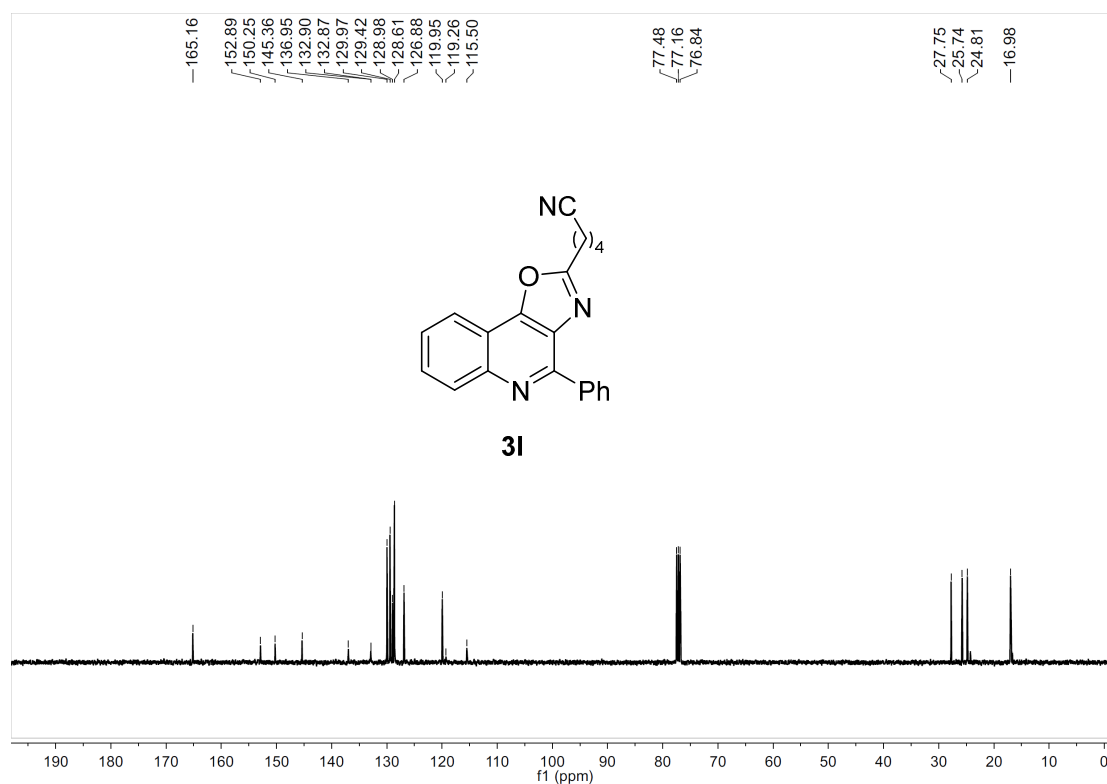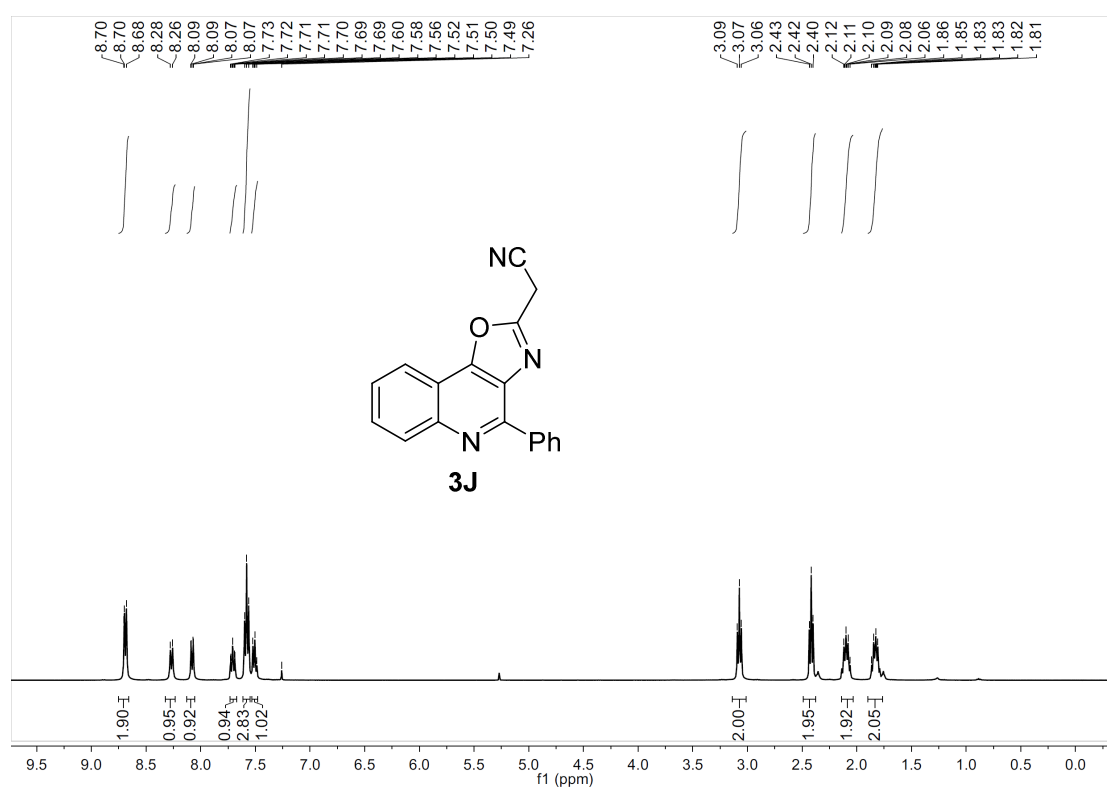

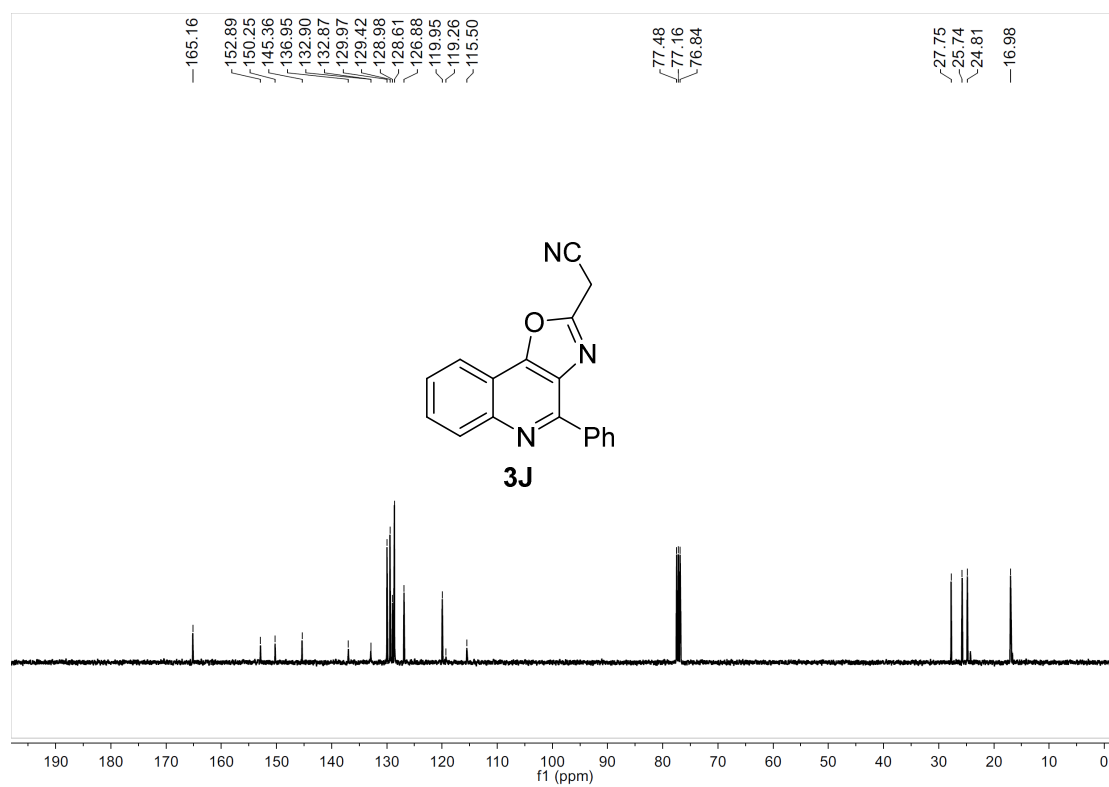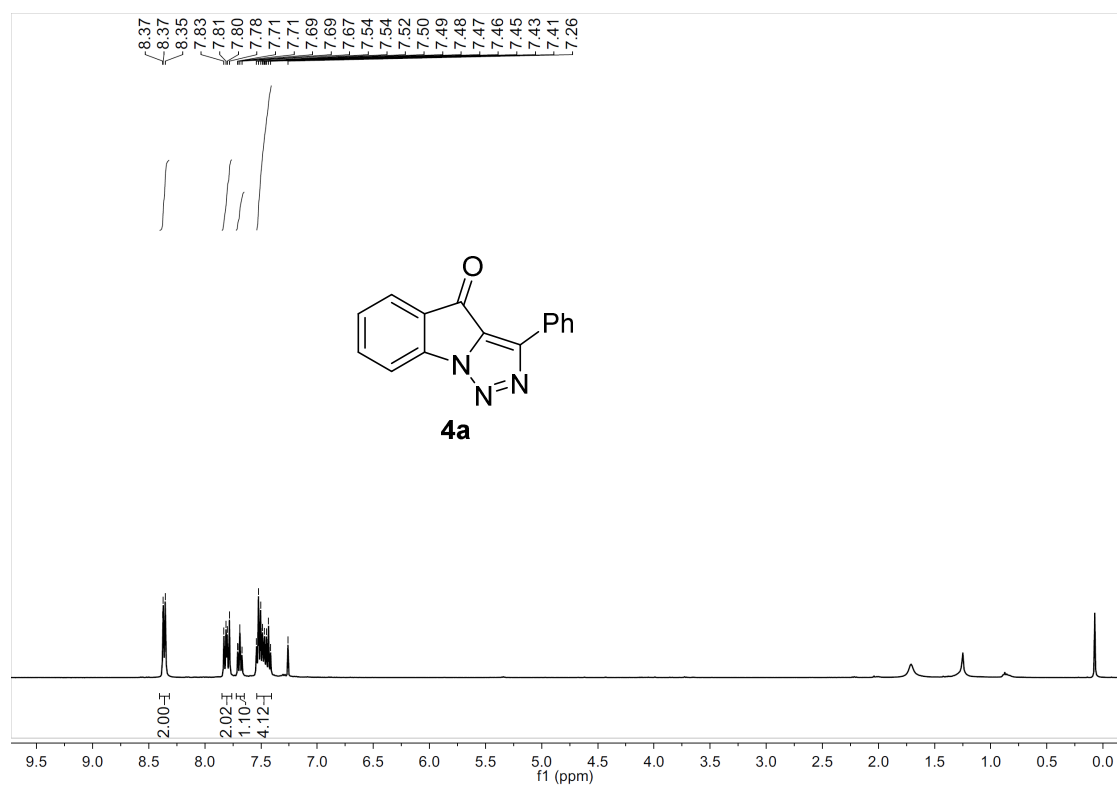

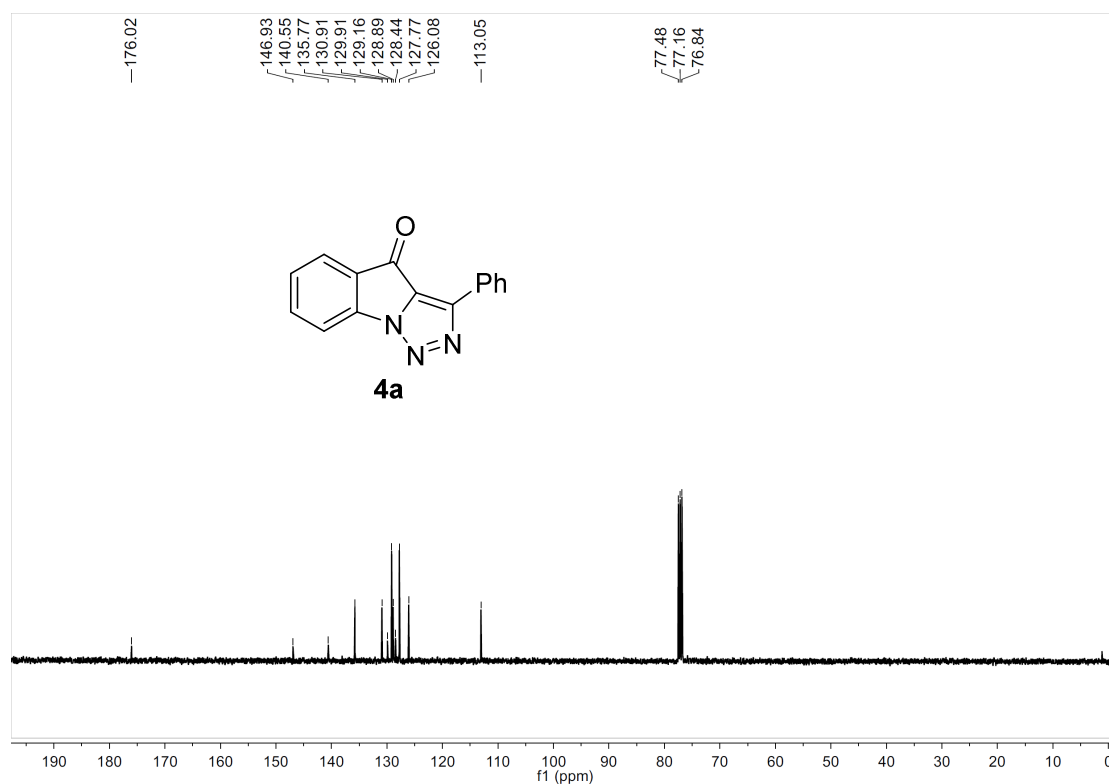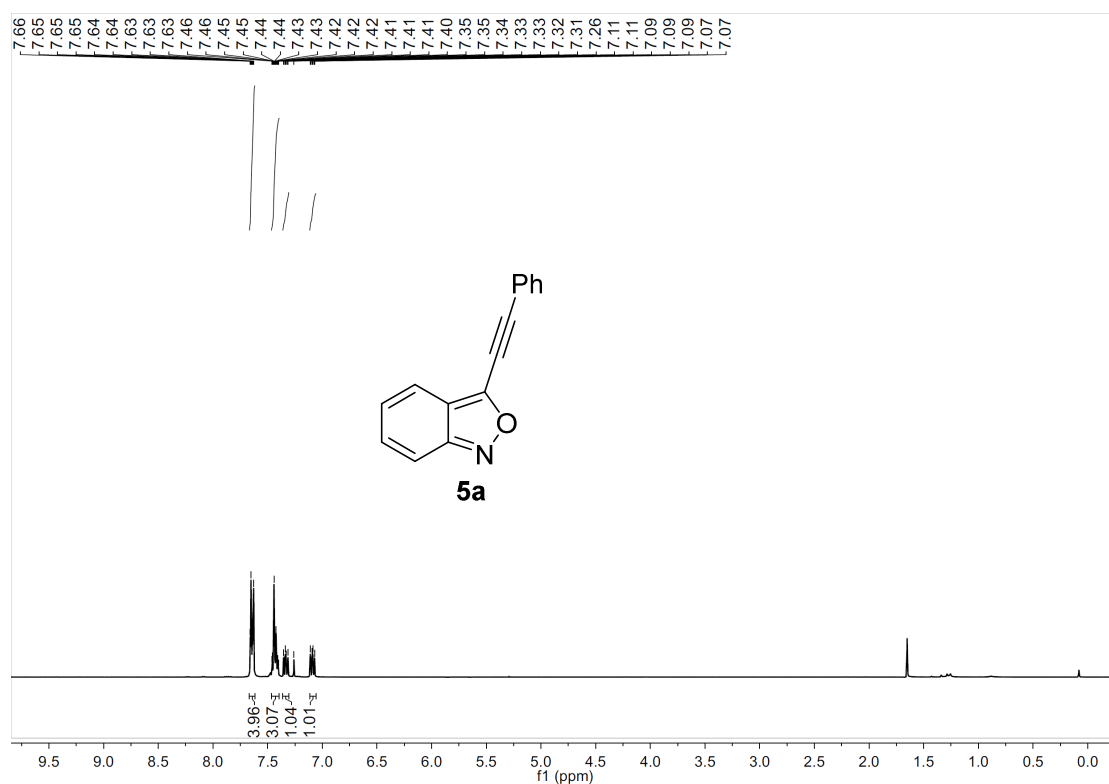

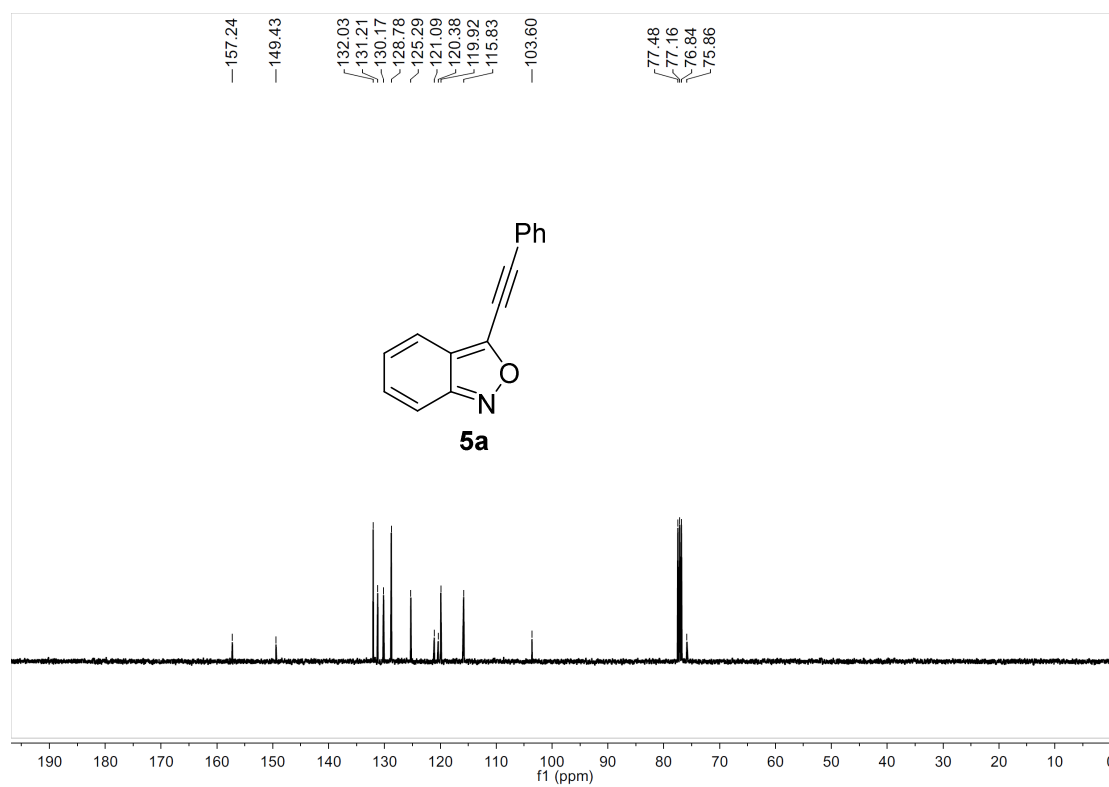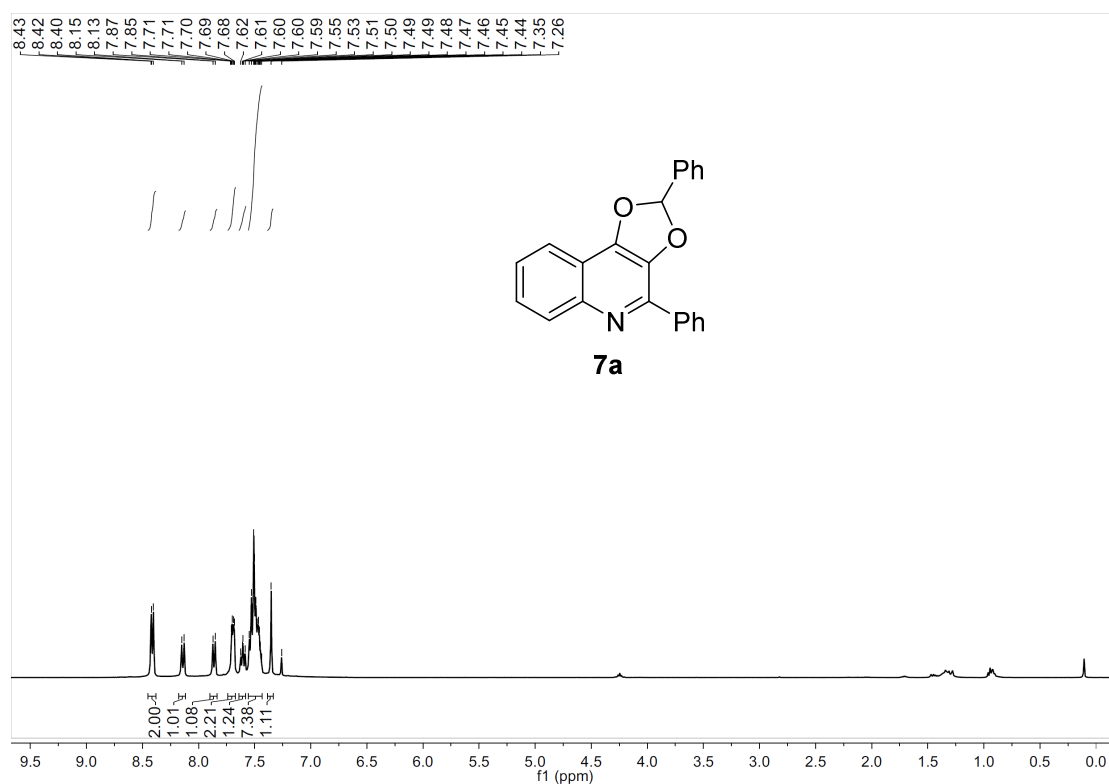



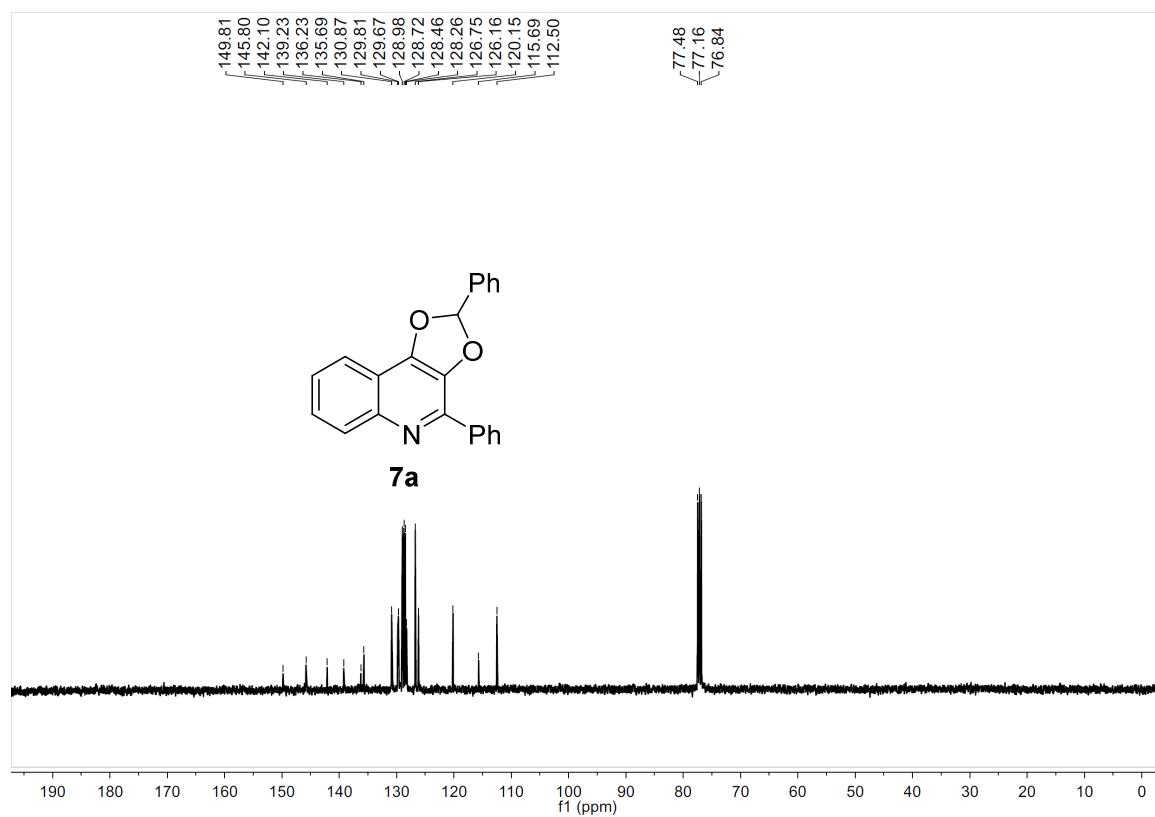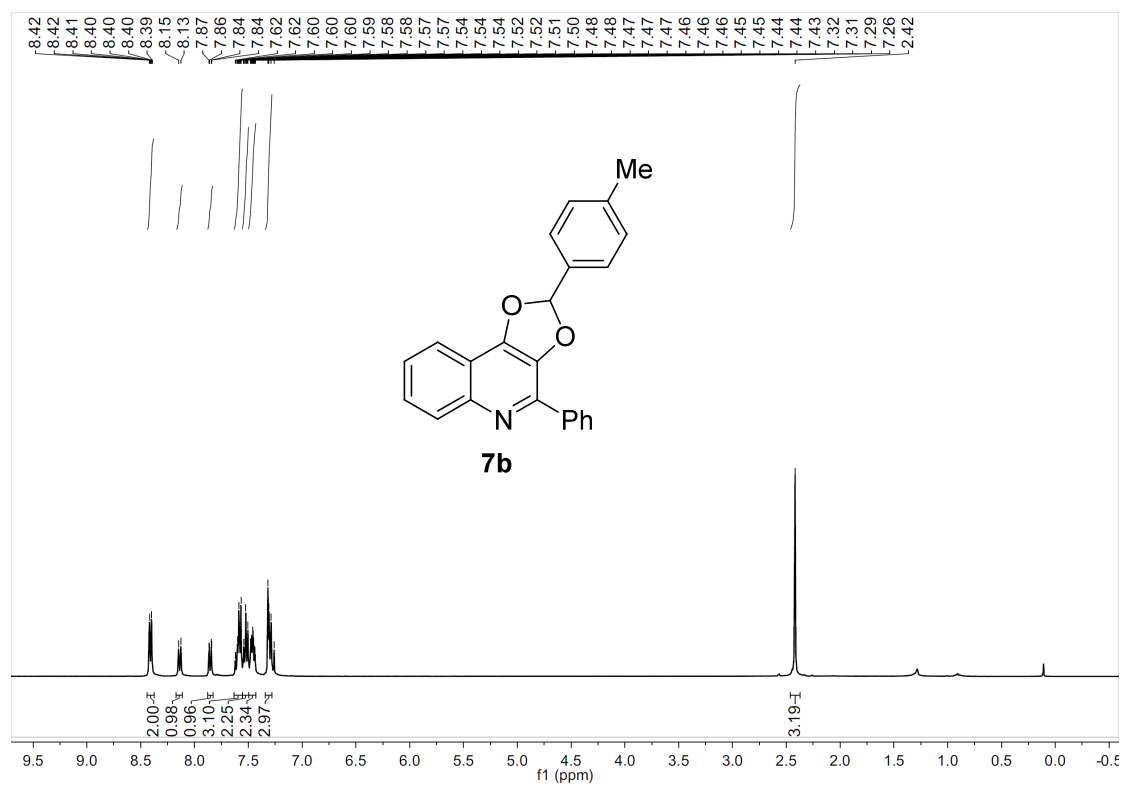

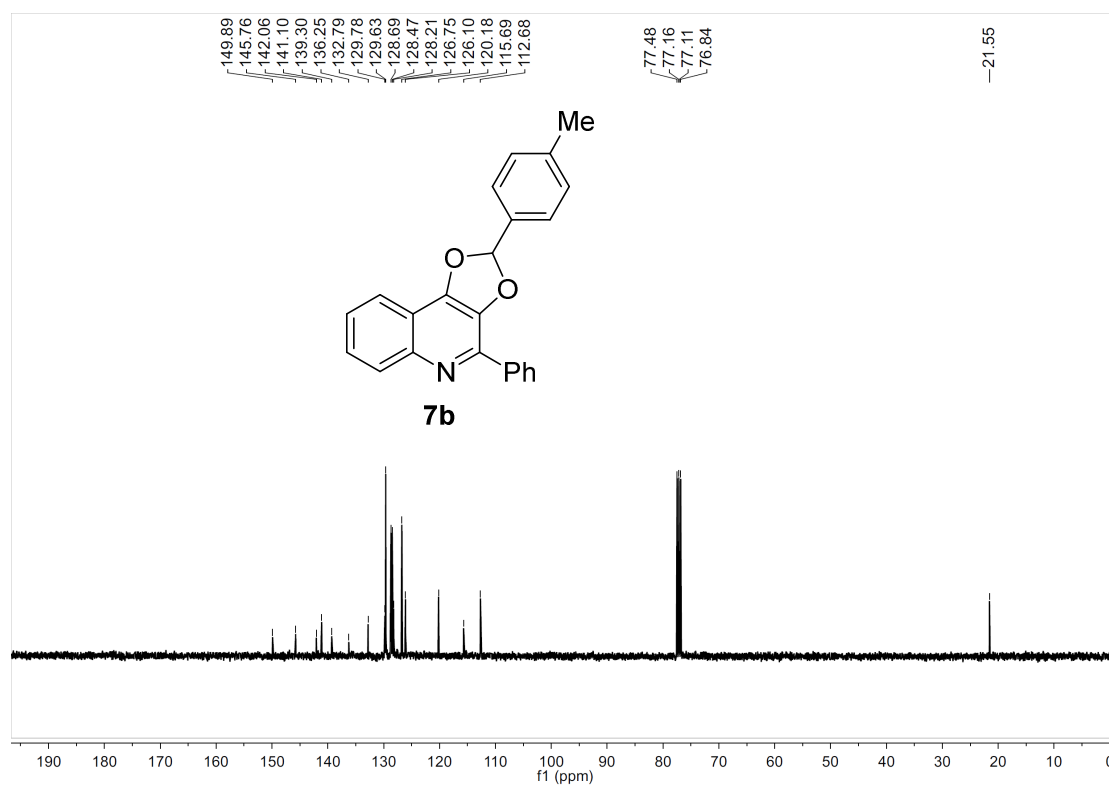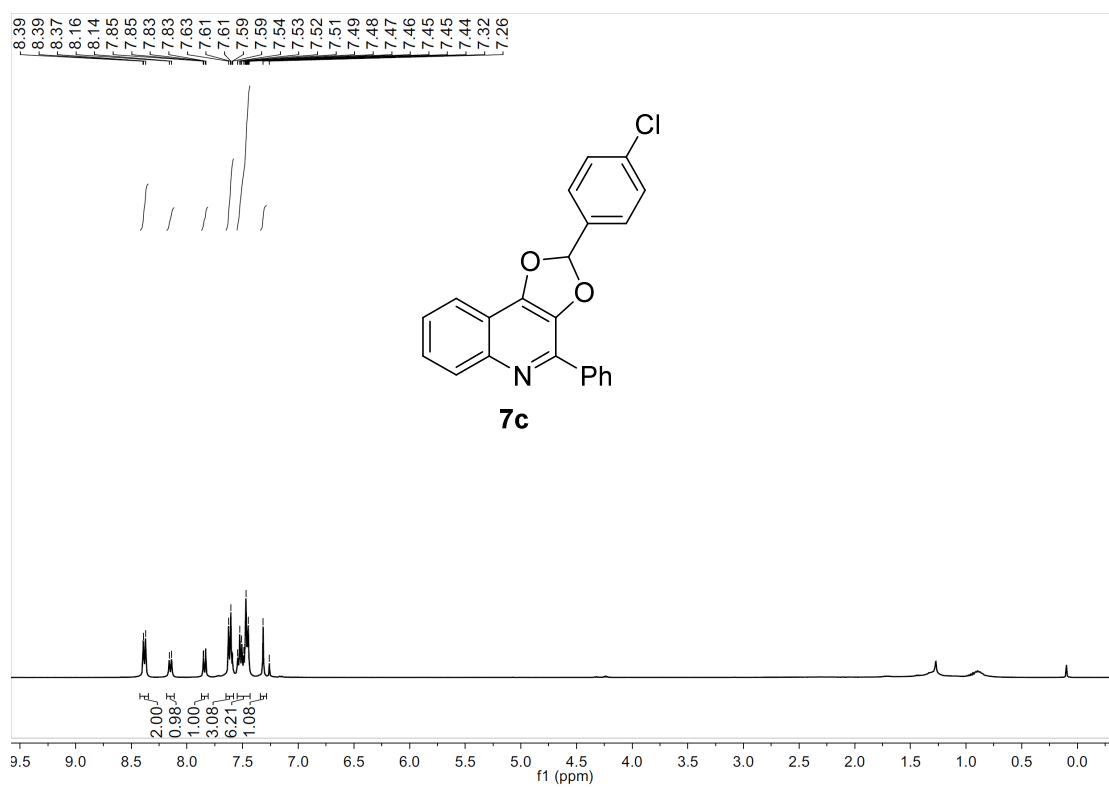

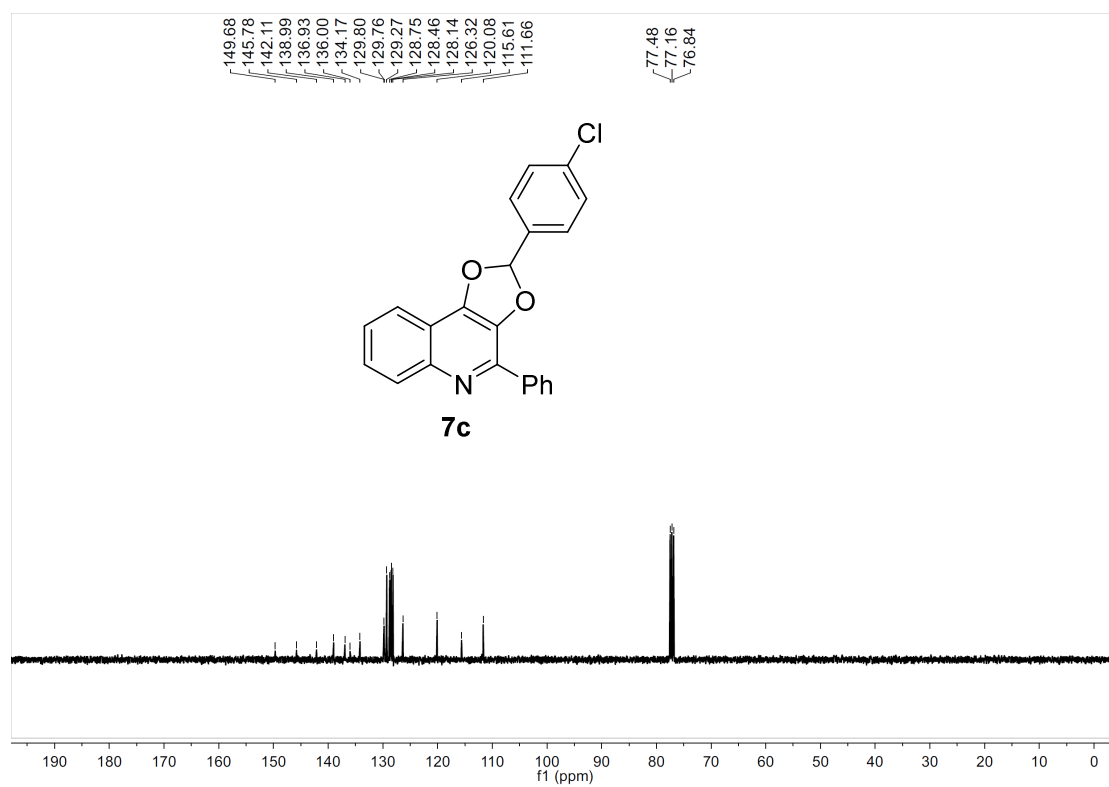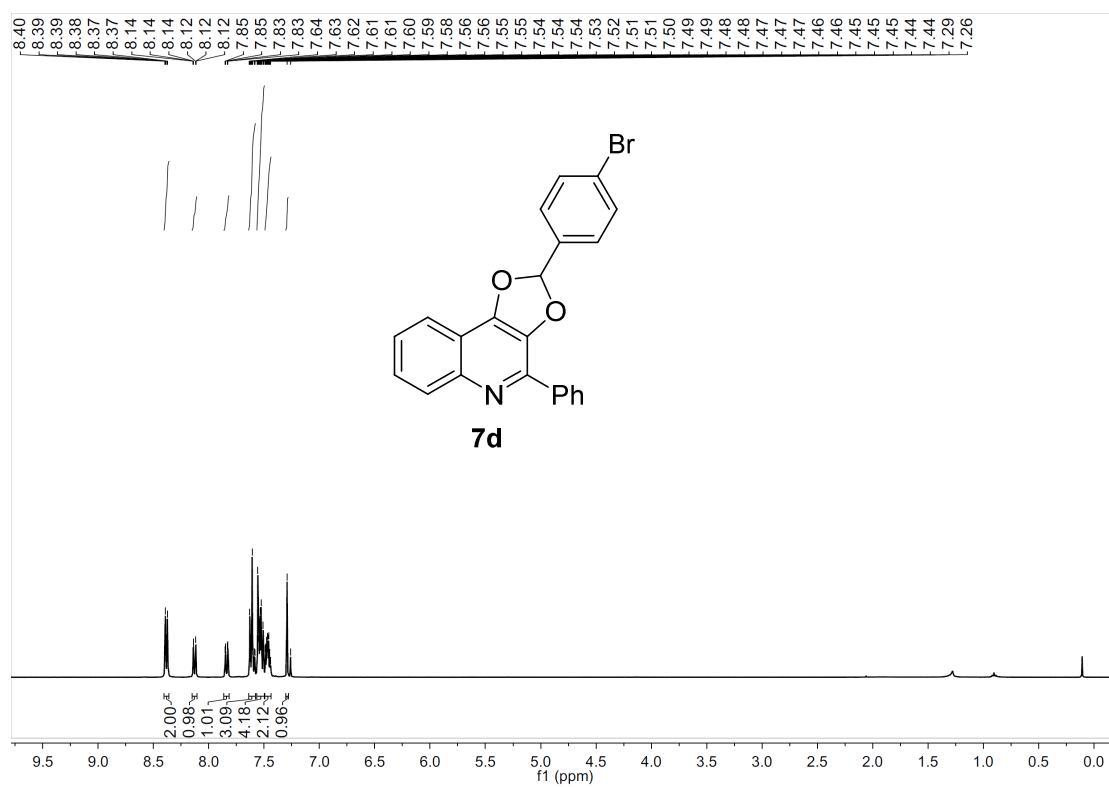

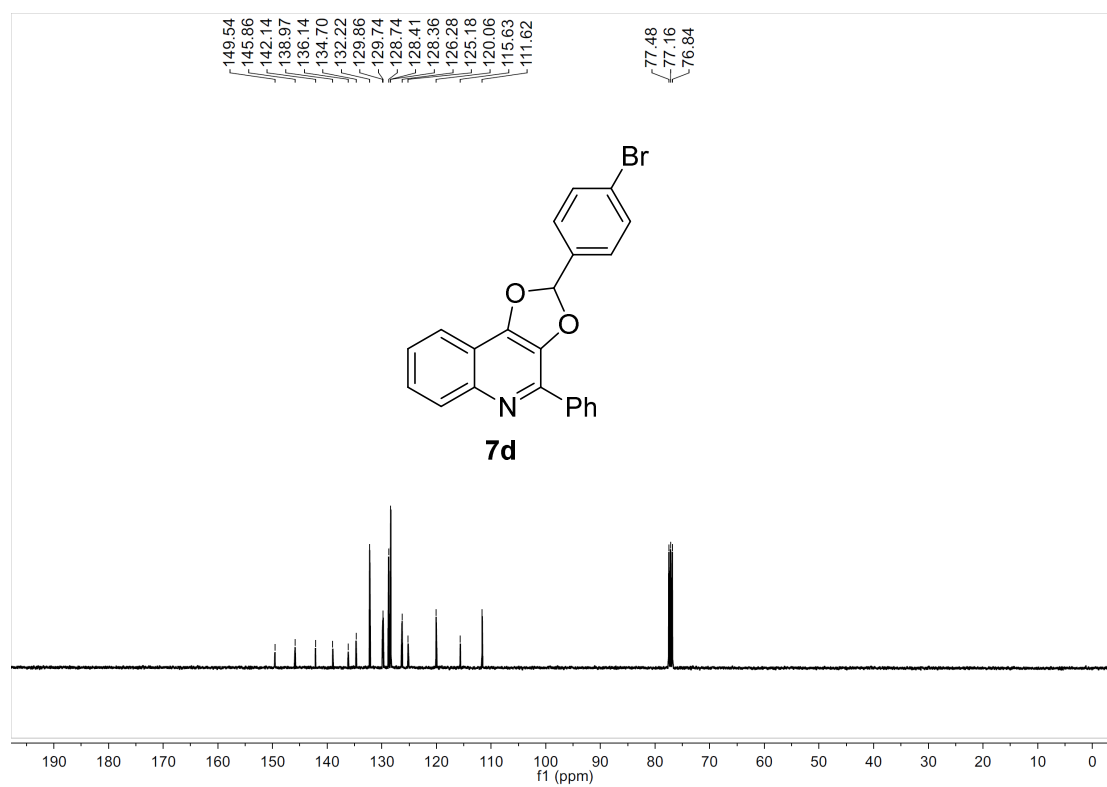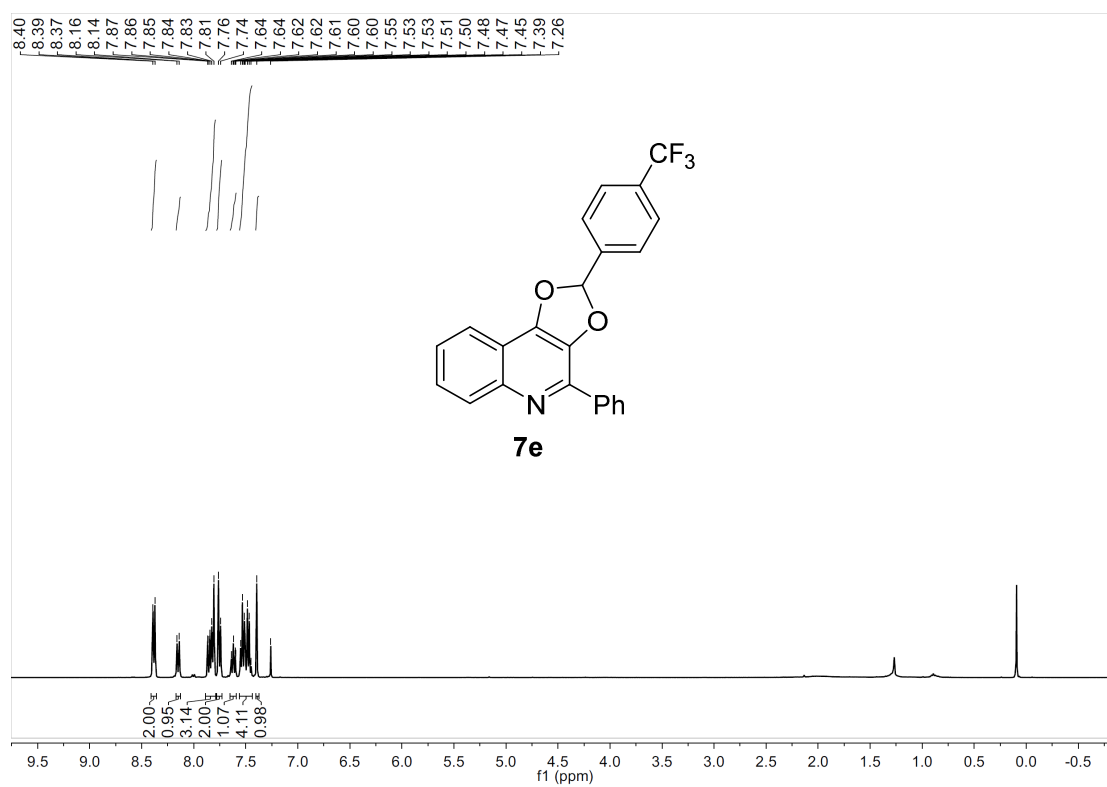

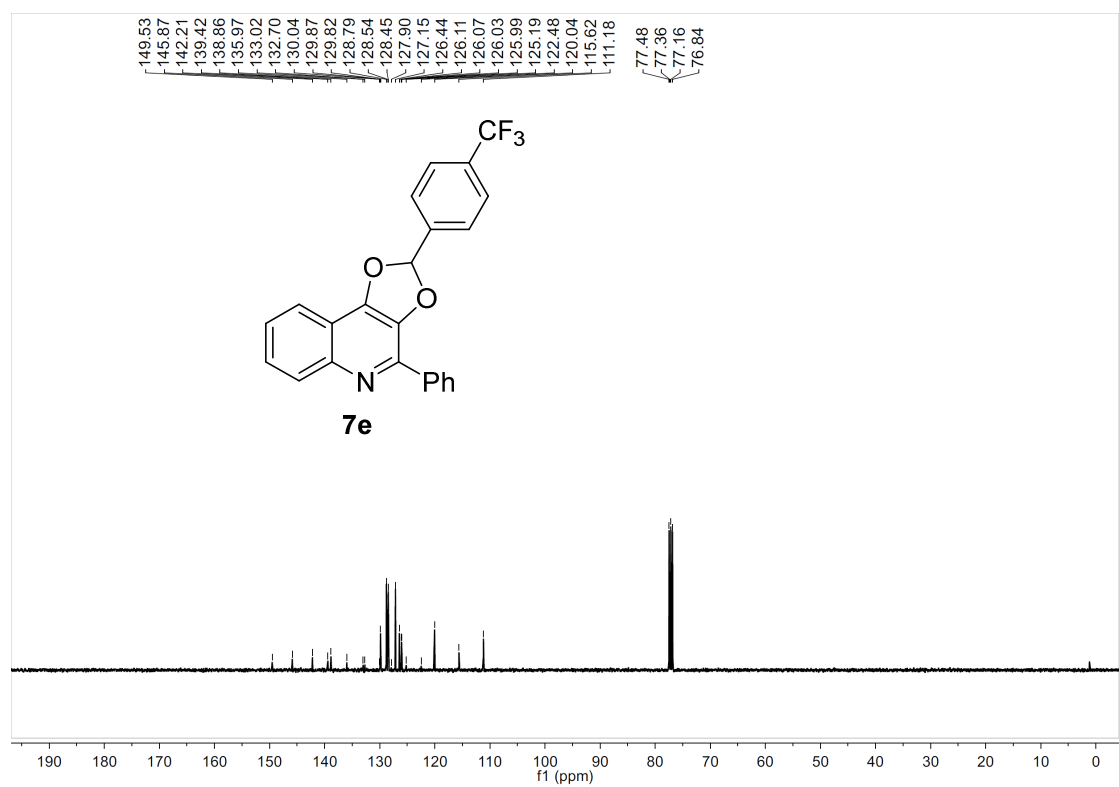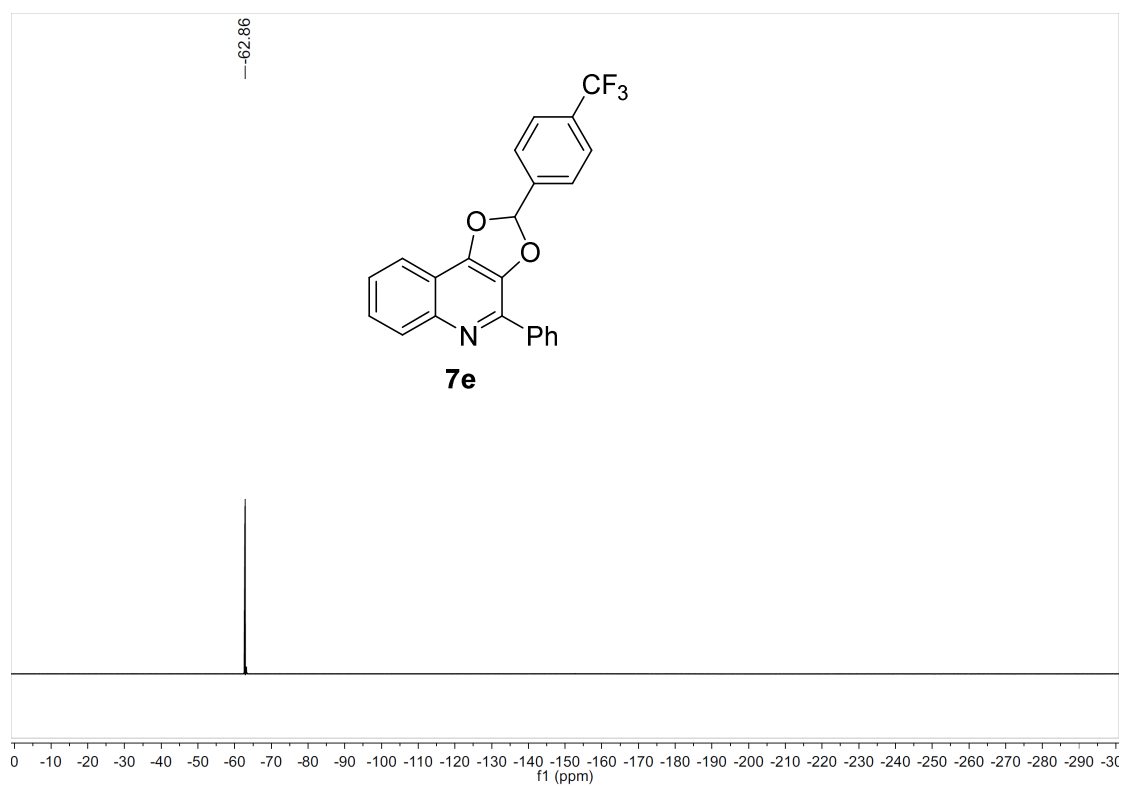

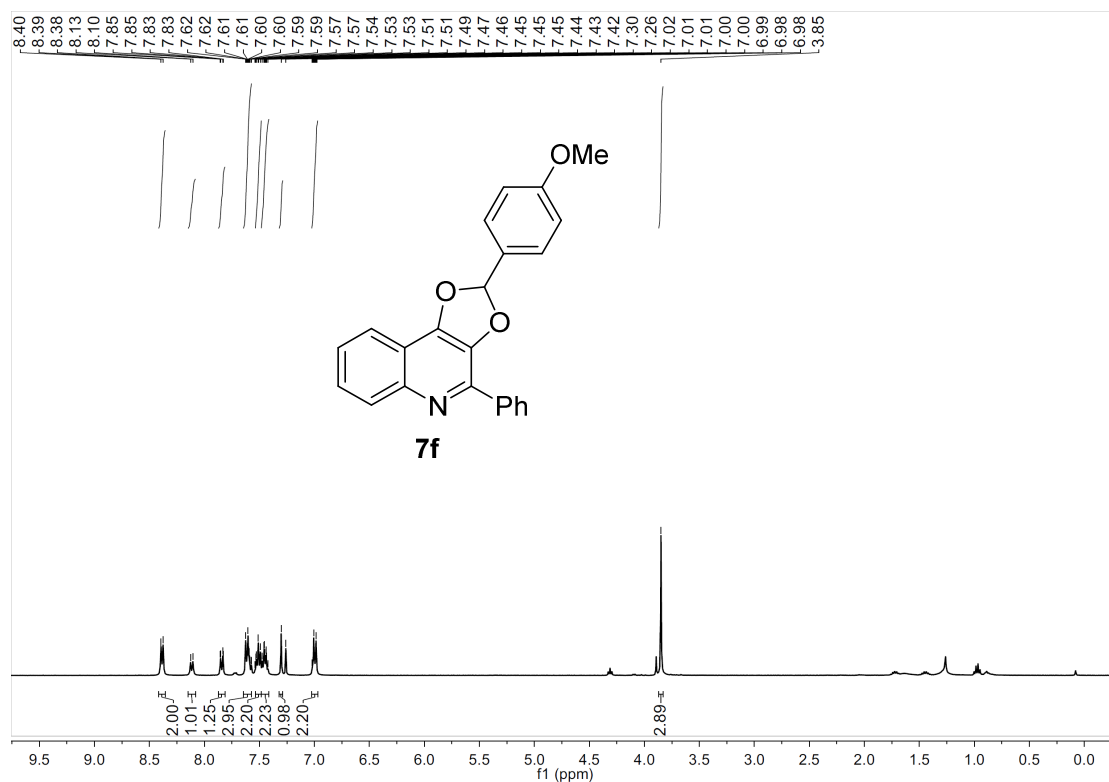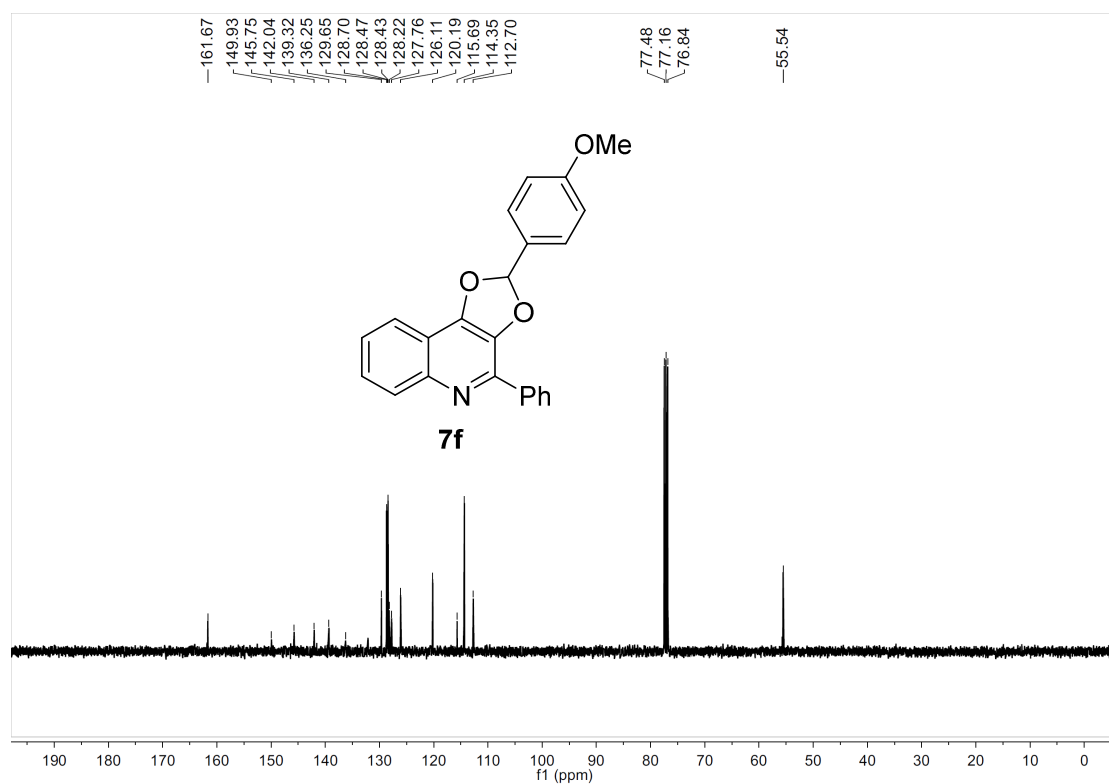

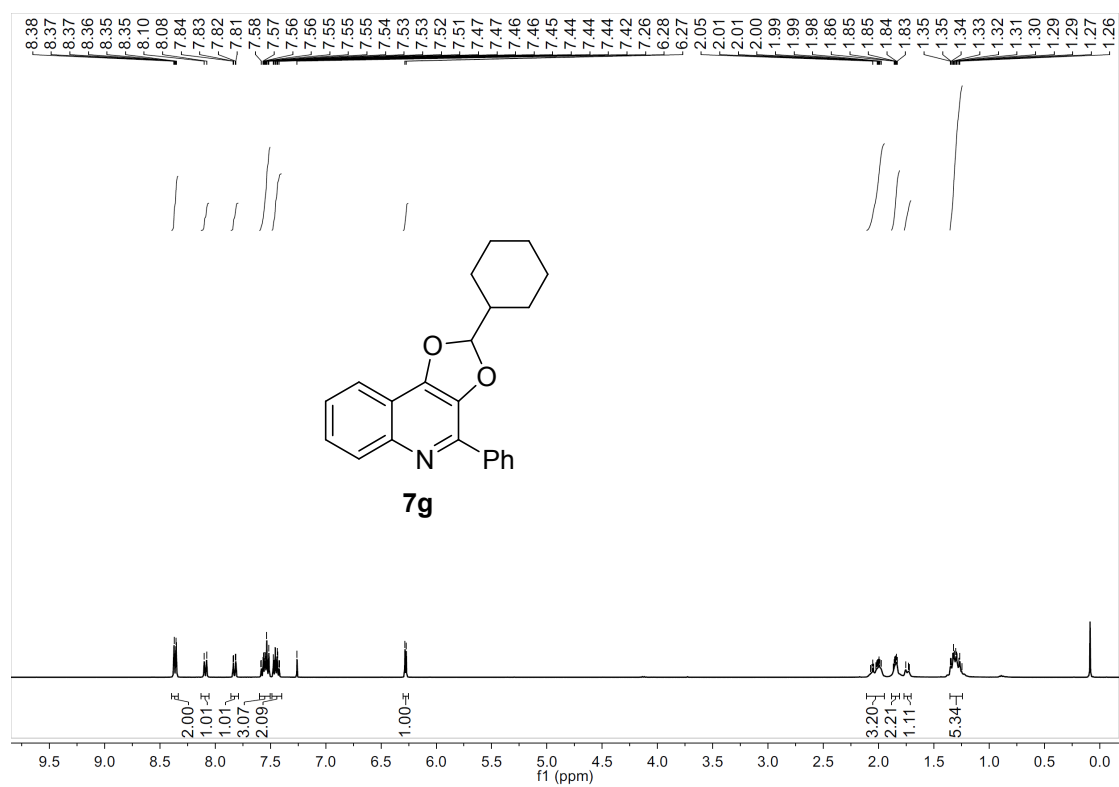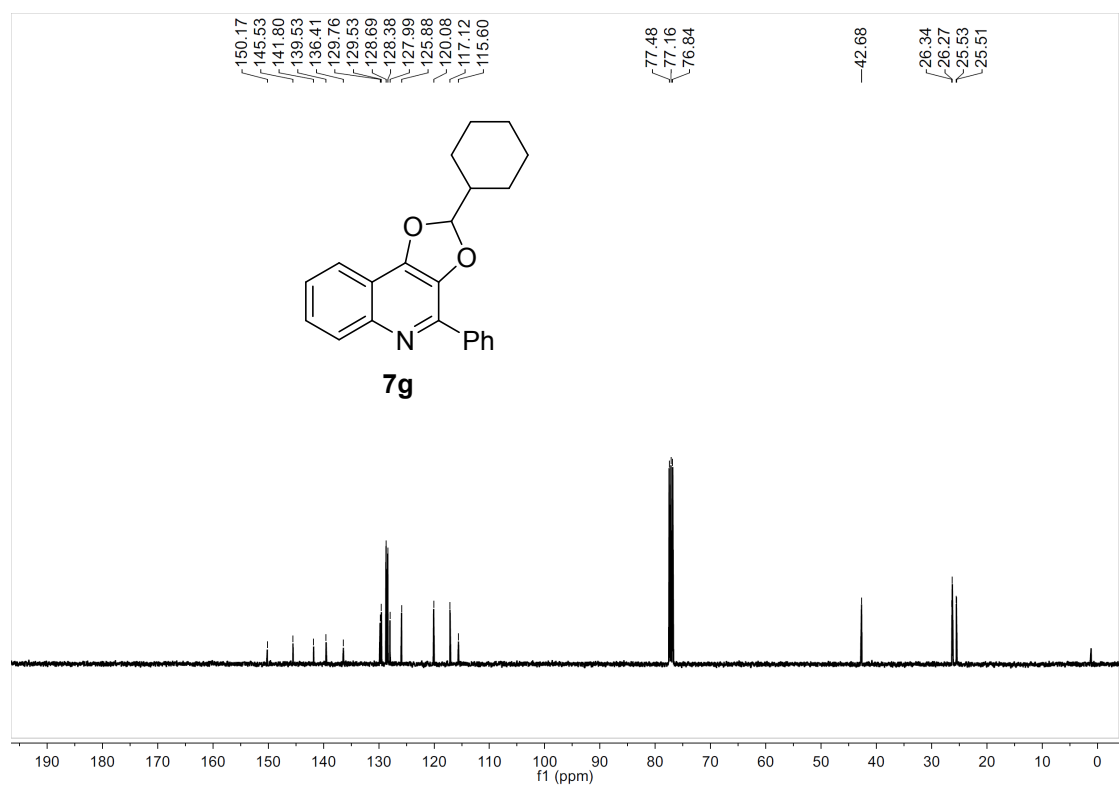

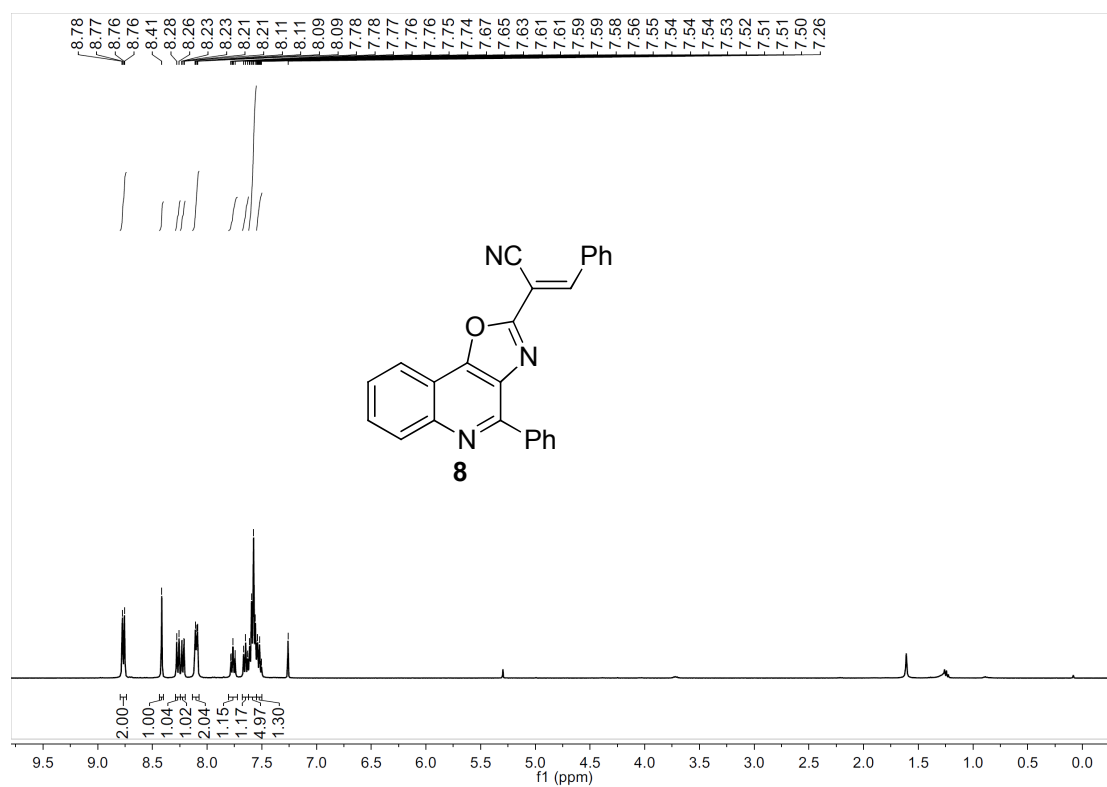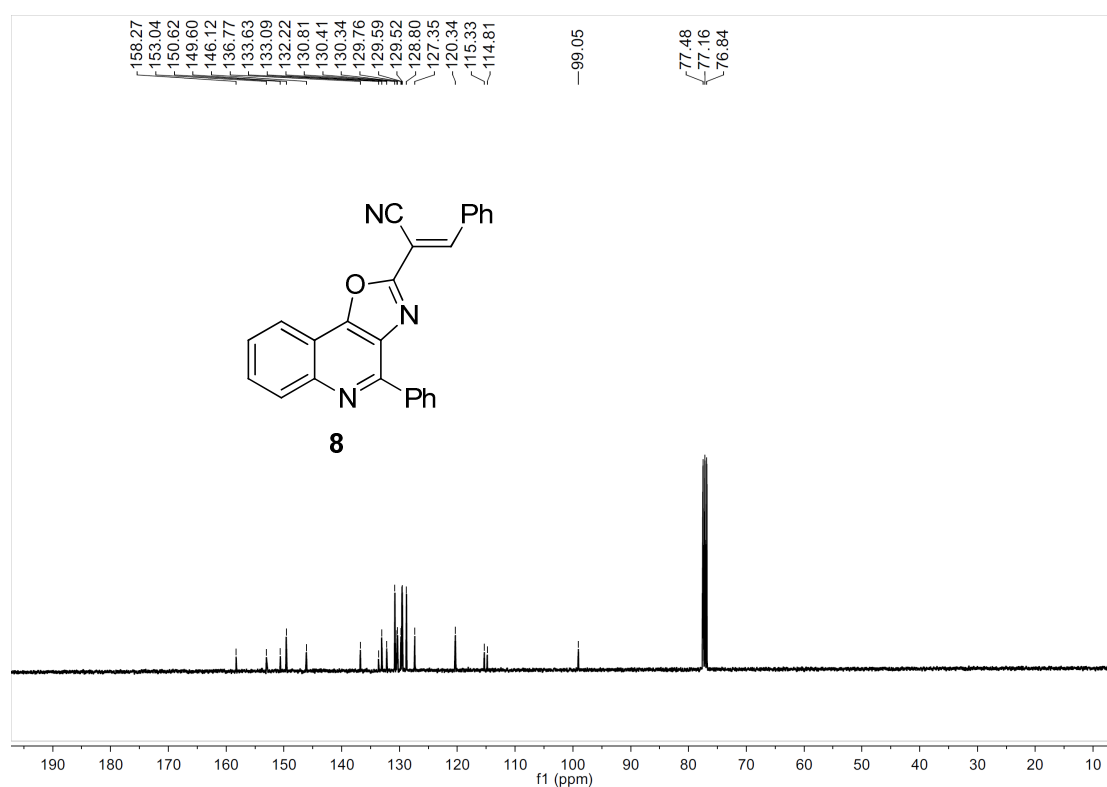



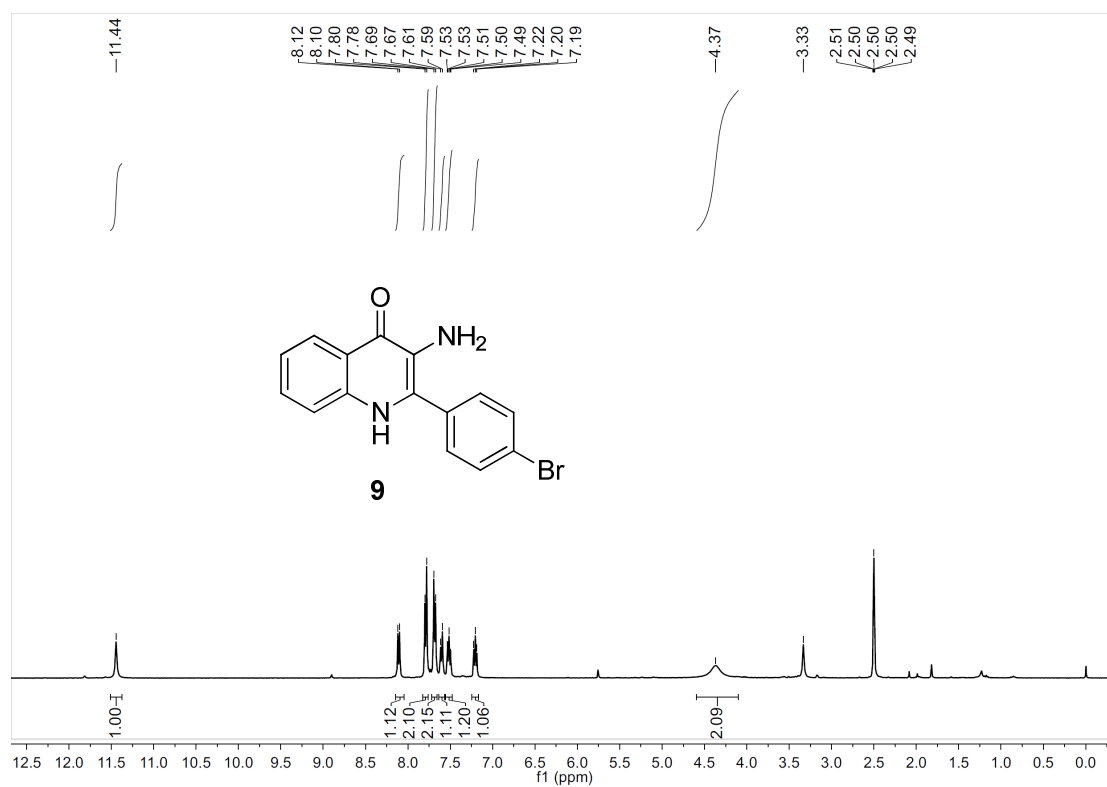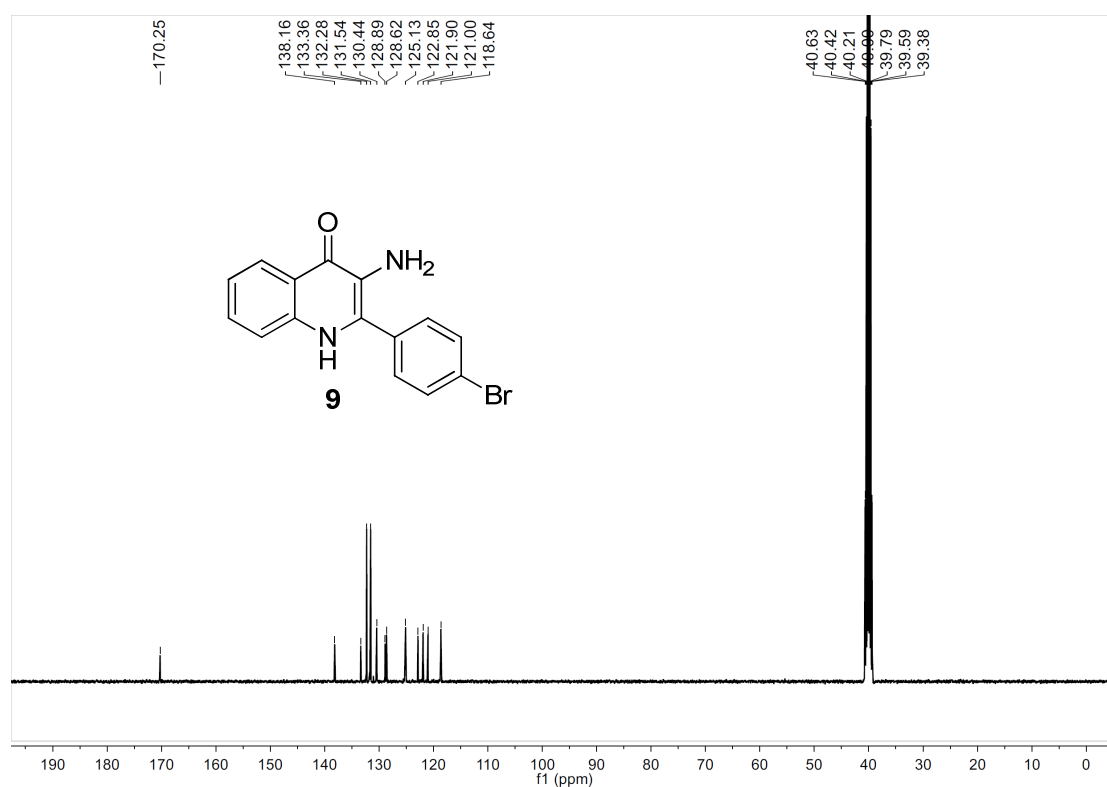

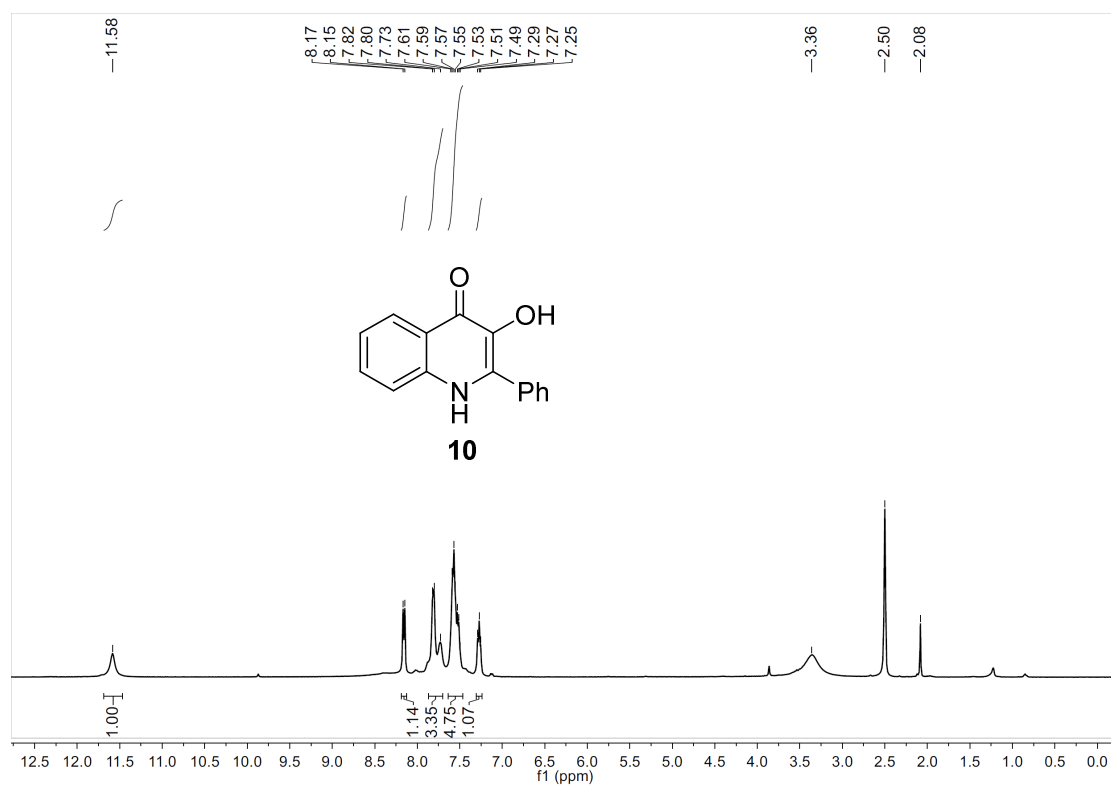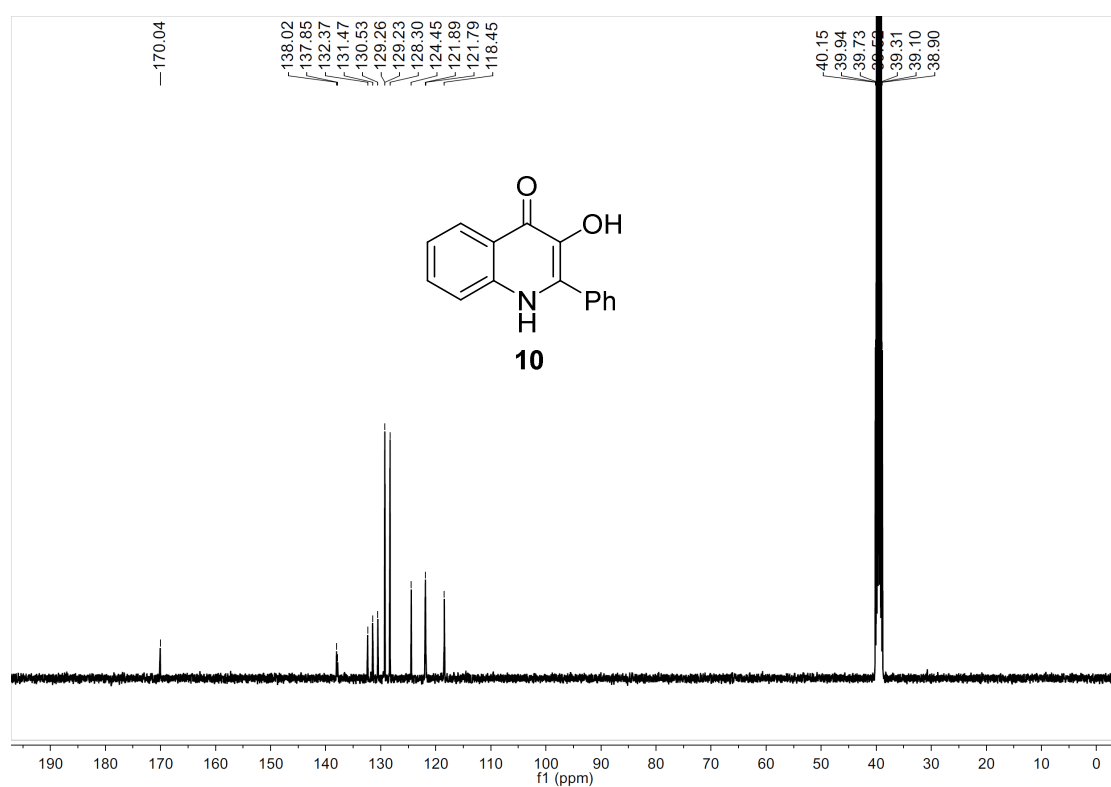

## Crystallographic Data for Compound 3s.

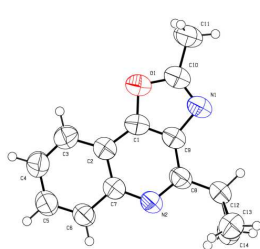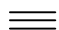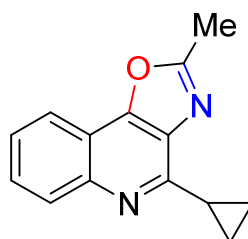

X-ray of **3s** CCDC 1888665

Bond precision: C-C = 0.0023 Å

Wavelength=0.71073

Cell: a=7.2536(6) b=9.2341(9) c=9.3515(10)  
alpha=85.065(8) beta=81.059(8) gamma=68.355(8)  
Temperature: 293 K

|                        | Calculated   | Reported     |
|------------------------|--------------|--------------|
| Volume                 | 574.85(10)   | 574.85(10)   |
| Space group            | P -1         | P -1         |
| Hall group             | -P 1         | -P 1         |
| Moiety formula         | C14 H12 N2 O | C14 H12 N2 O |
| Sum formula            | C14 H12 N2 O | C14 H12 N2 O |
| Mr                     | 224.26       | 224.26       |
| Dx, g cm <sup>-3</sup> | 1.296        | 1.296        |
| Z                      | 2            | 2            |
| Mu (mm <sup>-1</sup> ) | 0.084        | 0.084        |
| F000                   | 236.0        | 236.0        |
| F000'                  | 236.09       |              |
| h,k,lmax               | 10,13,13     | 10,12,13     |
| Nref                   | 3469         | 3111         |
| Tmin,Tmax              | 0.985,0.992  | 0.869,1.000  |
| Tmin'                  | 0.983        |              |

Correction method= # Reported T Limits: Tmin=0.869 Tmax=1.000  
AbsCorr = MULTI-SCAN

Data completeness= 0.897

Theta(max)= 30.351

R(reflections)= 0.0533( 1816)

wR2(reflections)= 0.1669( 3111)

S = 1.016

Npar= 155

## Crystallographic Data for Compound 8.

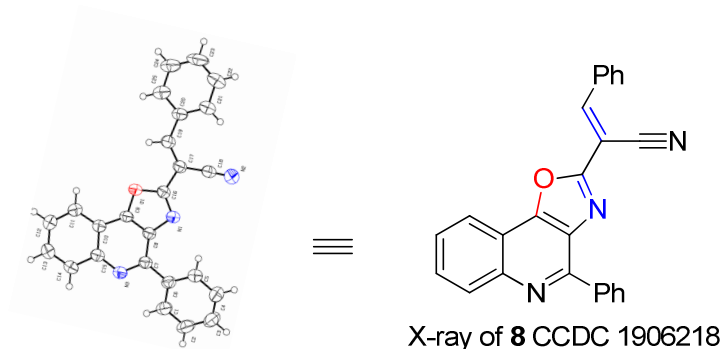


---

|                                                               |                                                  |                                                  |
|---------------------------------------------------------------|--------------------------------------------------|--------------------------------------------------|
| Bond precision:                                               | C-C = 0.0027 Å                                   | Wavelength=0.71073                               |
| Cell:                                                         | a=9.8811 (7)<br>alpha=90                         | b=14.4238 (7)<br>beta=109.258 (7)                |
| Temperature:                                                  | 279 K                                            | c=13.7948 (9)<br>gamma=90                        |
|                                                               | Calculated                                       | Reported                                         |
| Volume                                                        | 1856.1 (2)                                       | 1856.1 (2)                                       |
| Space group                                                   | P 21/n                                           | P 1 21/n 1                                       |
| Hall group                                                    | -P 2yn                                           | -P 2ybc (x-                                      |
| Moiety formula                                                | C <sub>25</sub> H <sub>15</sub> N <sub>3</sub> O | C <sub>25</sub> H <sub>15</sub> N <sub>3</sub> O |
| Sum formula                                                   | C <sub>25</sub> H <sub>15</sub> N <sub>3</sub> O | C <sub>25</sub> H <sub>15</sub> N <sub>3</sub> O |
| Mr                                                            | 373.40                                           | 373.42                                           |
| Dx, g cm <sup>-3</sup>                                        | 1.336                                            | 1.336                                            |
| Z                                                             | 4                                                | 4                                                |
| Mu (mm <sup>-1</sup> )                                        | 0.084                                            | 0.084                                            |
| F <sub>000</sub>                                              | 776.0                                            | 776.3                                            |
| F <sub>000</sub> '                                            | 776.30                                           |                                                  |
| h,k,lmax                                                      | 12,18,17                                         | 12,18,17                                         |
| Nref                                                          | 3788                                             | 3785                                             |
| Tmin,Tmax                                                     | 0.966,0.973                                      | 0.607,1.000                                      |
| Tmin'                                                         | 0.949                                            |                                                  |
| Correction method= # Reported T Limits: Tmin=0.607 Tmax=1.000 |                                                  |                                                  |
| AbsCorr = MULTI-SCAN                                          |                                                  |                                                  |
| Data completeness= 0.999                                      | Theta(max)= 26.370                               |                                                  |
| R(reflections)= 0.0468( 2608)                                 | wR2(reflections)= 0.1255( 3785)                  |                                                  |
| S = 1.066                                                     | Npar= 262                                        |                                                  |

---
